# Supplementary material
Source: publisher figshare collection journal article supplement (https://gsapubs.figshare.com/ndownloader/files/32665046)
Supplement: Supplementary file 1 [file 32665046]

## Sheet: Sample Locations
Sample_ID	River	Latitude	Longitude
18BhR-01	Bighorn River	46.1413	-107.462
18CfR-01	Clark Fork of the Yellowstone	45.5566	-108.825
18GR-02	Gallatin River	45.8873	-111.444
18JR-02	Jefferson River	45.8334	-111.664
18JuR-01	Judith River	47.2739	-109.72
18MaR-02	Madison River	45.8016	-111.51
18MiR-01	Milk River	48.1199	-106.38
18MR-01	Missouri River	45.9401	-111.49
18MR-02	Missouri River	46.0355	-111.423
18MR-03	Missouri River	46.3351	-111.531
18MR-04	Missouri River	47.028	-112.014
18MR-05	Missouri River	47.4305	-111.501
18MR-06	Missouri River	47.5312	-111.235
18MR-07	Missouri River	47.9058	-110.461
18MR-08	Missouri River	48.0315	-110.236
18MR-10	Missouri River	48.0675	-105.541
18MR-11A	Missouri River	48.1227	-104.475
18MR-11	Missouri River	48.1227	-104.475
18MR-11B	Missouri River	48.1227	-104.475
18MR-12A	Missouri River	48.1058	-103.717
18MR-12B	Missouri River	48.1058	-103.717
18MR-12	Missouri River	48.1058	-103.717
18MsR-01	Marias River	47.942	-110.547
18MuR-01	Musselshell River	46.9961	-107.889
18PR-01	Powder River	46.7371	-105.428
18SmR-01	Smith River	47.3547	-111.437
18SuR-01	Sun River	47.5475	-111.531
18ToR-01	Tounge River	46.3955	-105.854
18TR-01	Teton River	47.8447	-110.714
18YR-01	Yellowstone River	45.5965	-110.566
18YR-02	Yellowstone River	45.6117	-108.842
18YR-03	Yellowstone River	45.6882	-108.644
18YR-04	Yellowstone River	46.1417	-107.549
18YR-05	Yellowstone River	46.2571	-107.339
18YR-06	Yellowstone River	46.3465	-106.067
18YR-07	Yellowstone River	46.5319	-105.715
18YR-09A	Yellowstone River	47.8597	-103.968
18YR-09B	Yellowstone River	47.8597	-103.968
18YR-09	Yellowstone River	47.8597	-103.968

## Sheet: DZ U-Pb data
									207/235		206/238		207/206		Best age
Sample #	Grain #	[U] ppm	U/Th	207/235	2σ error	206/238	2σ error	RHO	Age Ma	2σ error	Age (Ma)	2σ error	Age (Ma)	2σ error	(Ma)	2σ error	% Discordance*	Rim/Core
18BhR-01	18BhR-01_1	138	95.4	1.823	0.04	0.1794	0.0021	15	1052	15	1063	11	1025	45	1025	45	3.70732
18BhR-01	18BhR-01_2	689	402	0.0958	0.0029	0.0145	0.00024	2.7	93.1	2.7	92.8	1.5	113	56	92.8	1.5	0.322234
18BhR-01	18BhR-01_3	834	323	0.1015	0.0033	0.01498	0.00026	3	98	3	95.8	1.7	173	62	95.8	1.7	2.2449
18BhR-01	18BhR-01_4	8.33	8.99	4.09	0.25	0.284	0.01	50	1617	50	1604	51	1630	100	1630	100	1.59509
18BhR-01	18BhR-01_5	395	275	0.0992	0.0035	0.01509	0.00024	3.3	95.9	3.3	96.5	1.6	116	73	96.5	1.6	0.625652
18BhR-01	18BhR-01_6	343	212	3.196	0.064	0.2488	0.0038	16	1454	16	1432	20	1492	28	1492	28	4.02145
18BhR-01	18BhR-01_7	462	458	0.0738	0.003	0.01155	0.00019	2.8	72.1	2.8	74	1.2	55	78	74	1.2	2.63523
18BhR-01	18BhR-01_8	497	278	0.1051	0.0041	0.01546	0.00022	3.8	101.3	3.8	98.9	1.4	164	79	98.9	1.4	2.3692
18BhR-01	18BhR-01_9	234	69.2	1.671	0.037	0.1686	0.0039	14	996	14	1004	22	1000	43	1000	43	0.4	Core
18BhR-01	18BhR-01_9	555	239	0.75	0.042	0.0783	0.0024	24	564	24	486	15	910	120	486	15	13.8298	Rim
18BhR-01	18BhR-01_10	108.9	96.3	1.892	0.037	0.1887	0.0026	13	1077	13	1114	14	1022	39	1022	39	9.00196
18BhR-01	18BhR-01_11	680	581.8	1.868	0.023	0.1763	0.0015	8	1068.9	8	1046.4	8	1122	20	1122	20	6.73797
18BhR-01	18BhR-01_13	229	148.8	0.0776	0.0091	0.01175	0.00045	8.6	75.6	8.6	75.3	2.9	100	230	75.3	2.9	0.396825	Rim
18BhR-01	18BhR-01_14	469	72.4	0.631	0.011	0.081	0.001	6.8	495.7	6.8	502.1	6.2	465	38	502.1	6.2	1.2911
18BhR-01	18BhR-01_15	1530	621	0.0987	0.0027	0.01472	0.00017	2.5	95.4	2.5	94.2	1.1	130	54	94.2	1.1	1.25786
18BhR-01	18BhR-01_16	1095	871	0.1002	0.0027	0.0154	0.00018	2.5	96.9	2.5	98.5	1.1	81	53	98.5	1.1	1.65119
18BhR-01	18BhR-01_17	1830	1110	0.1017	0.0024	0.01485	0.00017	2.2	98.3	2.2	95	1.1	186	49	95	1.1	3.35707
18BhR-01	18BhR-01_18	400	123.4	4.481	0.068	0.3091	0.0044	12	1725	12	1735	22	1716	20	1716	20	1.10723
18BhR-01	18BhR-01_19	748	174.3	3.5	0.19	0.244	0.012	44	1516	44	1407	61	1688	30	1688	30	16.6469	Core
18BhR-01	18BhR-01_19	680	504	0.0854	0.0046	0.01258	0.00027	4.3	83	4.3	80.6	1.7	170	100	80.6	1.7	2.89157	Rim
18BhR-01	18BhR-01_20	230	83.2	3.24	0.046	0.258	0.0029	11	1465	11	1479	15	1452	24	1452	24	1.8595
18BhR-01	18BhR-01_21	246	101.4	0.695	0.017	0.0869	0.0012	9.7	535.5	9.7	537	7.2	534	52	537	7.2	0.280112
18BhR-01	18BhR-01_22	194	130.5	3.409	0.048	0.2653	0.0029	11	1505	11	1516	15	1504	26	1504	26	0.797872
18BhR-01	18BhR-01_23	1781	709	0.097	0.0023	0.01478	0.0002	2.2	93.9	2.2	94.6	1.3	103	47	94.6	1.3	0.745474
18BhR-01	18BhR-01_24	365	386	1.84	0.024	0.1798	0.0018	8.6	1058.7	8.6	1065.7	9.6	1063	24	1063	24	0.253998
18BhR-01	18BhR-01_25	159.9	77	3.83	0.12	0.2787	0.0085	26	1596	26	1583	43	1636	45	1636	45	3.23961
18BhR-01	18BhR-01_26	592	319	0.0988	0.0032	0.01465	0.00023	2.9	95.5	2.9	93.7	1.5	159	65	93.7	1.5	1.88482
18BhR-01	18BhR-01_27	314	166.1	0.0697	0.0035	0.01093	0.0002	3.3	68.2	3.3	70.1	1.3	59	93	70.1	1.3	2.78592
18BhR-01	18BhR-01_28	693.5	518.6	3.383	0.067	0.2262	0.0042	16	1498	16	1314	22	1786	22	1786	22	26.4278
18BhR-01	18BhR-01_29	845	406	0.0987	0.0032	0.01499	0.00021	3	95.4	3	95.9	1.4	95	58	95.9	1.4	0.524109
18BhR-01	18BhR-01_30	139	153.9	3.949	0.06	0.2891	0.0039	12	1621	12	1636	20	1619	26	1619	26	1.05003
18BhR-01	18BhR-01_31	151.2	179.4	4.687	0.067	0.3181	0.0032	12	1762	12	1780	16	1763	23	1763	23	0.964265
18BhR-01	18BhR-01_32	986	574	0.1052	0.0032	0.01495	0.00026	3	101.4	3	95.7	1.6	251	59	95.7	1.6	5.6213
18BhR-01	18BhR-01_33	617	185.9	1.762	0.032	0.1689	0.0033	12	1030	12	1005	18	1112	29	1112	29	9.6223
18BhR-01	18BhR-01_34	487	384	2.976	0.051	0.2435	0.004	13	1399	13	1404	21	1415	23	1415	23	0.777385
18BhR-01	18BhR-01_35	585	318	1.679	0.024	0.1671	0.002	9.2	999.2	9.2	996	11	1035	23	1035	23	3.76812
18BhR-01	18BhR-01_36	1420	690	0.1122	0.0032	0.01571	0.00026	2.9	107.9	2.9	100.5	1.7	304	67	100.5	1.7	6.8582
18BhR-01	18BhR-01_37	2330	570	0.054	0.0025	0.00854	0.00021	2.4	53.3	2.4	54.8	1.3	65	89	54.8	1.3	2.81426
18BhR-01	18BhR-01_38	155.3	94.6	3.865	0.054	0.2837	0.0033	11	1604	11	1609	17	1615	23	1615	23	0.371517
18BhR-01	18BhR-01_40	339	246.8	0.0983	0.0041	0.01496	0.00024	3.7	94.9	3.7	95.7	1.6	120	83	95.7	1.6	0.842993
18BhR-01	18BhR-01_41	643	33.1	0.4843	0.0083	0.06547	0.00077	5.7	400.4	5.7	408.8	4.6	360	41	408.8	4.6	2.0979
18BhR-01	18BhR-01_42	330	227	0.0926	0.0041	0.01382	0.00022	3.8	89.6	3.8	88.5	1.4	161	91	88.5	1.4	1.22768
18BhR-01	18BhR-01_43	357.2	375	22.31	0.28	0.6364	0.0075	12	3195	12	3173	29	3215	11	3215	11	1.30638
18BhR-01	18BhR-01_44	501	147	4.561	0.069	0.2998	0.0044	13	1740	13	1689	22	1812	18	1812	18	6.78808
18BhR-01	18BhR-01_45	321	129.1	16.45	0.24	0.5652	0.0089	14	2903	14	2890	36	2922	17	2922	17	1.09514
18BhR-01	18BhR-01_47	234	157	4.428	0.053	0.3083	0.0035	9.5	1717.3	9.5	1732	17	1705	21	1705	21	1.58358
18BhR-01	18BhR-01_48	179.1	147	2.84	0.057	0.2331	0.0037	15	1364	15	1350	19	1392	33	1392	33	3.01724
18BhR-01	18BhR-01_49	1048	201	4.051	0.06	0.2818	0.0036	12	1643	12	1600	18	1709	20	1709	20	6.378
18BhR-01	18BhR-01_50	213.2	356.5	0.559	0.018	0.06772	0.00092	11	449	11	422.3	5.5	572	64	422.3	5.5	5.94655
18BhR-01	18BhR-01_51	345	166.5	0.1009	0.004	0.01538	0.00023	3.7	97.3	3.7	98.4	1.5	94	78	98.4	1.5	1.13052
18BhR-01	18BhR-01_52	658	425	0.1113	0.0046	0.01515	0.00024	4.2	106.9	4.2	97	1.5	314	80	97	1.5	9.26099
18BhR-01	18BhR-01_53	312	103.6	0.775	0.016	0.0961	0.0014	9.2	581.1	9.2	591.3	8.3	538	45	591.3	8.3	1.75529
18BhR-01	18BhR-01_55	277.2	267.1	0.0452	0.0029	0.00683	0.00016	2.8	44.8	2.8	43.9	1.1	130	120	43.9	1.1	2.00893
18BhR-01	18BhR-01_56	471	112.6	1.887	0.053	0.1817	0.0042	18	1073	18	1076	23	1068	35	1068	35	0.749064
18BhR-01	18BhR-01_57	197.1	222.2	0.2543	0.009	0.03624	0.0006	7.3	229.1	7.3	229.4	3.7	222	71	229.4	3.7	0.130947
18BhR-01	18BhR-01_58	460	478	0.1016	0.004	0.01494	0.00024	3.7	98	3.7	95.6	1.5	161	78	95.6	1.5	2.44898
18BhR-01	18BhR-01_59	493	355	0.811	0.012	0.0996	0.0012	6.8	602.3	6.8	612.2	7.2	575	31	612.2	7.2	1.6437
18BhR-01	18BhR-01_60	1756	362	0.0993	0.003	0.01469	0.00033	2.8	96	2.8	94	2.1	154	53	94	2.1	2.08333
18BhR-01	18BhR-01_61	140.8	52.47	0.762	0.023	0.0969	0.0015	13	573	13	595.8	8.8	488	61	595.8	8.8	3.97906
18BhR-01	18BhR-01_62	1160	608	0.0823	0.0028	0.01222	0.00017	2.6	80.1	2.6	78.3	1.1	158	67	78.3	1.1	2.24719
18BhR-01	18BhR-01_63	776	432	3.337	0.045	0.2494	0.0036	10	1488	10	1437	18	1584	18	1584	18	9.2803
18BhR-01	18BhR-01_64	1300	63	13.4	0.85	0.5	0.025	59	2649	59	2600	100	2749	32	2749	32	5.42015
18BhR-01	18BhR-01_65	221	150	0.092	0.0058	0.01409	0.00032	5.3	88.8	5.3	90.2	2	100	110	90.2	2	1.57658
18BhR-01	18BhR-01_66	603	304	3.105	0.035	0.2488	0.0029	8.8	1432.6	8.8	1432	15	1437	16	1437	16	0.347947
18BhR-01	18BhR-01_67	202.3	113.2	0.1311	0.0075	0.01659	0.00057	6.7	124.7	6.7	106	3.6	500	140	106	3.6	14.996
18BhR-01	18BhR-01_68	1071	329	0.1237	0.003	0.01835	0.00021	2.6	118.6	2.6	117.2	1.4	137	47	117.2	1.4	1.18044
18BhR-01	18BhR-01_69	144.7	83.1	3.241	0.05	0.2522	0.0039	12	1465	12	1449	20	1475	29	1475	29	1.76271
18BhR-01	18BhR-01_70	342.4	253.2	13.98	0.13	0.5209	0.005	8.7	2747.2	8.7	2702	21	2768	11	2768	11	2.38439
18BhR-01	18BhR-01_71	100.5	118.3	0.124	0.011	0.01819	0.00047	9.9	117.7	9.9	116.2	3	180	170	116.2	3	1.27443
18BhR-01	18BhR-01_72	10.89	1.06	21.55	0.85	0.509	0.014	36	3139	36	2631	55	3497	35	3497	35	24.7641
18BhR-01	18BhR-01_73	497	255.5	0.1041	0.0035	0.01519	0.00022	3.3	100.8	3.3	97.1	1.4	170	71	97.1	1.4	3.67063
18BhR-01	18BhR-01_74	139.9	78.6	0.712	0.036	0.0859	0.0028	21	544	21	531	17	569	92	531	17	2.38971
18BhR-01	18BhR-01_75	1010	202.9	0.0544	0.0017	0.00804	0.00013	1.6	53.7	1.6	51.63	0.86	158	70	51.63	0.86	3.85475
18BhR-01	18BhR-01_76	232	117.3	1.543	0.025	0.1592	0.0014	10	946	10	952.4	7.9	925	29	925	29	2.96216
18BhR-01	18BhR-01_77	159	70.6	2.507	0.06	0.209	0.0042	17	1271	17	1223	23	1345	30	1345	30	9.07063
18BhR-01	18BhR-01_78	1170	319	0.0563	0.002	0.0084	0.00013	1.9	55.5	1.9	53.95	0.86	124	69	53.95	0.86	2.79279
18BhR-01	18BhR-01_79	228.7	101.8	4.791	0.059	0.3165	0.003	10	1781	10	1772	15	1786	19	1786	19	0.783875
18BhR-01	18BhR-01_80	889	130	1.776	0.025	0.1722	0.002	9.5	1036.1	9.5	1024	11	1054	19	1054	19	2.8463
18BhR-01	18BhR-01_82	259	121.8	5.12	0.058	0.3259	0.0031	9.5	1837.7	9.5	1818	15	1857	17	1857	17	2.10016
18BhR-01	18BhR-01_83	302	107.5	0.1002	0.0046	0.0151	0.00025	4.3	97.2	4.3	96.6	1.6	119	90	96.6	1.6	0.617284
18BhR-01	18BhR-01_84	431	319	0.0768	0.0032	0.01113	0.00017	3	75	3	71.3	1.1	180	85	71.3	1.1	4.93333
18BhR-01	18BhR-01_85	288.5	126.1	2.822	0.036	0.2354	0.003	9.6	1359.6	9.6	1362	16	1364	22	1364	22	0.146628
18BhR-01	18BhR-01_86	33.21	27.7	1.855	0.062	0.1759	0.0035	22	1061	22	1044	19	1081	71	1081	71	3.42276
18BhR-01	18BhR-01_87	830	225	0.1012	0.0033	0.01474	0.00022	3.1	97.8	3.1	94.3	1.4	176	66	94.3	1.4	3.57873
18BhR-01	18BhR-01_88	240	110.2	0.75	0.014	0.0918	0.0012	8.2	566.8	8.2	565.8	7.3	565	44	565.8	7.3	0.176429
18BhR-01	18BhR-01_89	1069	435	0.1066	0.0029	0.01589	0.0002	2.7	102.7	2.7	101.6	1.3	135	54	101.6	1.3	1.07108
18BhR-01	18BhR-01_90	273.7	212.7	0.0997	0.0048	0.01527	0.0003	4.5	96.2	4.5	97.7	1.9	80	91	97.7	1.9	1.55925
18BhR-01	18BhR-01_91	608	181	0.719	0.02	0.0809	0.0018	12	549	12	501	11	735	50	501	11	8.74317
18BhR-01	18BhR-01_92	30.9	74.1	12.53	0.36	0.4362	0.0093	27	2637	27	2331	41	2878	34	2878	34	19.0063
18BhR-01	18BhR-01_95	1244	524	0.0891	0.0024	0.01376	0.00023	2.2	86.6	2.2	88.1	1.4	64	55	88.1	1.4	1.7321
18BhR-01	18BhR-01_96	289.3	181.3	0.1037	0.0054	0.01541	0.0003	4.9	99.8	4.9	98.6	1.9	120	100	98.6	1.9	1.2024
18BhR-01	18BhR-01_97	490	181	6.04	0.12	0.3562	0.007	16	1983	16	1963	33	1983	25	1983	25	1.00857
18BhR-01	18BhR-01_98	442.7	290.1	4.908	0.05	0.3301	0.0036	8.5	1802.4	8.5	1838	17	1748	14	1748	14	5.14874
18BhR-01	18BhR-01_99	714	11.6	1.962	0.025	0.1887	0.0021	8.4	1101.2	8.4	1114	11	1057	18	1057	18	5.39262
18BhR-01	18BhR-01_100	123.5	135.1	3.983	0.078	0.2818	0.0038	16	1633	16	1600	19	1657	33	1657	33	3.43995
18BhR-01	18BhR-01_101	298	93.2	4.334	0.056	0.2989	0.0038	11	1700	11	1685	19	1706	18	1706	18	1.23095
18BhR-01	18BhR-01_102	172	125.5	0.546	0.014	0.0701	0.0013	9.2	441.1	9.2	436.4	7.7	463	63	436.4	7.7	1.06552
18BhR-01	18BhR-01_103	939	438	2.126	0.026	0.1863	0.002	8.3	1156.2	8.3	1101	11	1258	17	1258	17	12.4801
18BhR-01	18BhR-01_104	432	279	0.1104	0.0045	0.0155	0.00027	4.1	106.1	4.1	99.2	1.7	269	89	99.2	1.7	6.5033
18BhR-01	18BhR-01_105	643	332.9	0.0764	0.0027	0.01164	0.00021	2.6	74.6	2.6	74.6	1.4	104	71	74.6	1.4	0
18BhR-01	18BhR-01_106	535	252.7	0.0957	0.0032	0.01449	0.00019	3	92.6	3	92.8	1.2	102	69	92.8	1.2	0.215983
18BhR-01	18BhR-01_107	1126	301	0.0553	0.0019	0.00814	0.00012	1.8	54.6	1.8	52.29	0.79	155	69	52.29	0.79	4.23077
18BhR-01	18BhR-01_108	751	371	0.1103	0.0032	0.01428	0.0002	3	106.1	3	91.4	1.3	406	62	91.4	1.3	13.8549
18BhR-01	18BhR-01_109	30.51	50.2	2.204	0.086	0.1878	0.0041	26	1175	26	1108	22	1270	78	1270	78	12.7559
18BhR-01	18BhR-01_110	230	255	4.014	0.064	0.2873	0.0045	13	1634	13	1626	22	1632	22	1632	22	0.367647
18BhR-01	18BhR-01_111	972	445	0.102	0.0028	0.01515	0.00017	2.6	98.5	2.6	97	1.1	120	55	97	1.1	1.52284
18BhR-01	18BhR-01_113	271.8	58.9	2.878	0.055	0.2276	0.0036	14	1374	14	1321	19	1442	32	1442	32	8.39112
18BhR-01	18BhR-01_114	1329	176.1	7.23	0.12	0.3491	0.0069	15	2139	15	1929	33	2336	24	2336	24	17.4229
18BhR-01	18BhR-01_115	112.5	78.2	0.1104	0.0083	0.01415	0.00038	7.5	105.5	7.5	90.5	2.4	390	150	90.5	2.4	14.218
18BhR-01	18BhR-01_116	669	380	0.1145	0.0053	0.01584	0.00022	4.7	109.7	4.7	101.3	1.4	265	81	101.3	1.4	7.65725
18BhR-01	18BhR-01_117	516	351	0.0736	0.0037	0.01134	0.0002	3.5	72	3.5	72.7	1.3	70	100	72.7	1.3	0.972222
18BhR-01	18BhR-01_118	104.9	66.2	1.749	0.037	0.1701	0.0022	14	1024	14	1012	12	1054	43	1054	43	3.98482
18BhR-01	18BhR-01_119	712	498	0.0728	0.0027	0.01129	0.00018	2.5	71.3	2.5	72.4	1.2	65	68	72.4	1.2	1.54278
18BhR-01	18BhR-01_120	236	188	1.739	0.033	0.1719	0.0024	12	1021	12	1022	13	1024	33	1024	33	0.195312
18BhR-01	18BhR-01_121	28.03	18.66	2.983	0.087	0.2355	0.0044	22	1395	22	1362	23	1439	57	1439	57	5.35094
18BhR-01	18BhR-01_122	268.6	186	0.0696	0.0037	0.01036	0.00023	3.5	68.1	3.5	66.5	1.5	160	100	66.5	1.5	2.34949
18BhR-01	18BhR-01_123	497	373	0.1121	0.004	0.01655	0.00031	3.7	107.6	3.7	105.8	1.9	136	69	105.8	1.9	1.67286
18BhR-01	18BhR-01_124	234	105.4	3.082	0.042	0.2405	0.0022	10	1426	10	1389	11	1456	24	1456	24	4.60165
18BhR-01	18BhR-01_125	715	519	0.0986	0.0032	0.01479	0.00023	2.9	95.4	2.9	94.6	1.4	103	61	94.6	1.4	0.838574
18BhR-01	18BhR-01_126	186.7	68	7.82	0.1	0.401	0.0052	11	2210	11	2175	25	2214	19	2214	19	1.76152
18BhR-01	18BhR-01_127	965	650	0.1006	0.0027	0.01461	0.00024	2.5	97.2	2.5	93.5	1.5	151	56	93.5	1.5	3.80658
18BhR-01	18BhR-01_129	364	97.7	2.813	0.035	0.2303	0.0027	9.2	1357.6	9.2	1336	14	1368	22	1368	22	2.33918
18BhR-01	18BhR-01_130	725	138.2	0.0555	0.0021	0.00821	0.00015	2.1	54.8	2.1	52.73	0.95	120	75	52.73	0.95	3.77737
18BhR-01	18BhR-01_131	705	331	0.076	0.003	0.01157	0.00018	2.8	74.2	2.8	74.1	1.2	73	70	74.1	1.2	0.134771
18BhR-01	18BhR-01_132	452	389.9	2.32	0.049	0.1952	0.003	15	1216	15	1149	16	1321	33	1321	33	13.0204
18BhR-01	18BhR-01_133	591	236	4.172	0.041	0.3004	0.003	8.1	1667.6	8.1	1693	15	1617	16	1617	16	4.70006
18BhR-01	18BhR-01_134	333	240.5	4.552	0.049	0.3132	0.0034	9	1739.1	9	1756	17	1703	18	1703	18	3.11216
18BhR-01	18BhR-01_135	224.9	298	4.185	0.068	0.2883	0.0038	13	1669	13	1632	19	1690	23	1690	23	3.43195
18BhR-01	18BhR-01_137	873	34.6	11.47	0.11	0.4813	0.0041	8.9	2561.1	8.9	2532	18	2573	10	2573	10	1.59347
18BhR-01	18BhR-01_138	257	201.3	1.875	0.033	0.1816	0.0027	12	1074	12	1075	14	1055	29	1055	29	1.89573
18BhR-01	18BhR-01_139	533	420	0.1007	0.0039	0.01462	0.00022	3.6	97.2	3.6	93.6	1.4	169	74	93.6	1.4	3.7037
18BhR-01	18BhR-01_140	618	252	0.0932	0.0027	0.01393	0.00021	2.5	90.4	2.5	89.2	1.4	132	60	89.2	1.4	1.32743
18BhR-01	18BhR-01_141	100.3	84.5	3.244	0.062	0.241	0.0036	15	1464	15	1391	19	1563	29	1563	29	11.0045
18BhR-01	18BhR-01_142	137.3	86.1	4.729	0.089	0.316	0.0047	16	1770	16	1774	24	1758	28	1758	28	0.910125
18BhR-01	18BhR-01_143	615	573	0.0915	0.0032	0.01417	0.00021	3.1	89.5	3.1	90.7	1.3	65	69	90.7	1.3	1.34078
18BhR-01	18BhR-01_144	683	398	0.5247	0.0083	0.06822	0.00065	5.7	428.5	5.7	425.4	3.9	432	36	425.4	3.9	0.723454
18BhR-01	18BhR-01_145	271.6	59	1.997	0.039	0.1917	0.0033	13	1113	13	1130	18	1092	37	1092	37	3.47985
18BhR-01	18BhR-01_146	579	280.4	6.735	0.066	0.3802	0.0036	8.7	2075.9	8.7	2076	17	2078	14	2078	14	0.0962464
18BhR-01	18BhR-01_147	389	135.6	4.668	0.062	0.3239	0.0041	11	1759	11	1807	20	1707	17	1707	17	5.85823
18BhR-01	18BhR-01_148	228	69.3	4.963	0.064	0.3297	0.0039	11	1811	11	1836	19	1791	21	1791	21	2.51256
18BhR-01	18BhR-01_149	198	59.1	6.22	0.1	0.3712	0.0049	14	2004	14	2034	23	1987	24	1987	24	2.36537
18BhR-01	18BhR-01_150	202.1	98.5	3.714	0.079	0.2593	0.0052	17	1572	17	1489	27	1698	35	1698	35	12.3086
18GR-01	18GR-01_1	533	429	0.1137	0.0038	0.01683	0.00018	3.4	109.3	3.4	107.6	1.1	153	65	107.6	1.1	1.55535
18GR-01	18GR-01_2	684	353	9.49	0.12	0.429	0.0057	12	2384	12	2300	26	2461.3	9.1	2461.3	9.1	6.55345
18GR-01	18GR-01_3	445	41.1	8.56	0.17	0.4007	0.0082	19	2288	19	2169	38	2402	13	2402	13	9.70025
18GR-01	18GR-01_4	779	31.4	1.847	0.011	0.17908	0.00098	3.9	1062.6	3.9	1061.9	5.4	1062	10	1062	10	0.0094162
18GR-01	18GR-01_5	125	23.1	0.2196	0.007	0.03253	0.00051	5.9	201	5.9	206.3	3.2	169	68	206.3	3.2	2.63682
18GR-01	18GR-01_6	88.7	51.6	1.833	0.03	0.1756	0.0016	10	1057	10	1042.9	9	1097	27	1097	27	4.93163
18GR-01	18GR-01_7	941	789	0.0914	0.0015	0.013632	9.4e-05	1.4	88.8	1.4	87.28	0.6	133	36	87.28	0.6	1.71171
18GR-01	18GR-01_8	303.5	265.7	15.315	0.087	0.5669	0.0036	5.4	2834.6	5.4	2895	15	2793.2	7.2	2793.2	7.2	3.64457
18GR-01	18GR-01_9	502	176	1.961	0.018	0.1903	0.0014	6.3	1101.7	6.3	1122.6	7.4	1061	16	1061	16	5.80584
18GR-01	18GR-01_10	110.9	72.5	0.555	0.011	0.07324	0.00058	7.1	447.2	7.1	455.6	3.5	399	45	455.6	3.5	1.87835
18GR-01	18GR-01_11	447	226.6	0.0513	0.0015	0.007878	9.3e-05	1.5	50.8	1.5	50.58	0.59	78	58	50.58	0.59	0.433071
18GR-01	18GR-01_12	331	111	11.72	0.38	0.419	0.013	35	2564	35	2244	61	2851.3	9	2851.3	9	21.2991
18GR-01	18GR-01_13	120.4	42.1	1.736	0.02	0.1719	0.0013	7.1	1022	7.1	1022.5	7.1	1020	22	1020	22	0.245098
18GR-01	18GR-01_14	164.8	140.5	3.695	0.055	0.271	0.0035	12	1569	12	1545	18	1599	16	1599	16	3.37711
18GR-01	18GR-01_15	52.8	42.6	14.35	0.14	0.5452	0.0057	9.1	2772.1	9.1	2804	24	2752	14	2752	14	1.88953
18GR-01	18GR-01_16	143.8	76.4	4.467	0.043	0.2973	0.0025	8	1723.8	8	1677	12	1786	15	1786	15	6.10302
18GR-01	18GR-01_17	799	342	0.1299	0.0063	0.01814	0.00048	5.6	123.7	5.6	115.8	3	259	65	115.8	3	6.38642
18GR-01	18GR-01_19	943	265.5	0.1048	0.0016	0.01595	0.00011	1.5	101.2	1.5	102.02	0.69	89	31	102.02	0.69	0.810277
18GR-01	18GR-01_20	148	163	15.33	0.11	0.5763	0.004	6.8	2835.1	6.8	2933	16	2774.3	9.6	2774.3	9.6	5.72036
18GR-01	18GR-01_21	80.7	51.8	0.608	0.014	0.07892	0.00089	8.8	482.6	8.8	489.6	5.3	442	52	489.6	5.3	1.45048
18GR-01	18GR-01_22	337	72.8	4.317	0.036	0.311	0.0022	6.8	1695.8	6.8	1745	11	1641	12	1641	12	6.3376
18GR-01	18GR-01_23	123	115	1.018	0.021	0.1174	0.0018	10	711	10	715	10	701	38	715	10	0.562588
18GR-01	18GR-01_24	188	106.9	1.98	0.019	0.1916	0.0016	6.4	1108.2	6.4	1130	8.6	1071	20	1071	20	5.50887
18GR-01	18GR-01_25	481	136.2	2.768	0.05	0.2243	0.0047	14	1345	14	1307	24	1415	29	1415	29	7.63251
18GR-01	18GR-01_26	379	349	18.97	0.29	0.5503	0.0086	14	3040	14	2824	36	3185	15	3185	15	11.3344
18GR-01	18GR-01_27	249.9	238.2	0.1306	0.0061	0.01671	0.00018	5.4	124.1	5.4	106.8	1.2	432	94	106.8	1.2	13.9404
18GR-01	18GR-01_28	85	35.9	3.943	0.058	0.2888	0.0033	12	1620	12	1635	17	1603	19	1603	19	1.99626
18GR-01	18GR-01_29	916	407	0.0969	0.0016	0.01486	0.00013	1.5	93.8	1.5	95.06	0.84	90	35	95.06	0.84	1.34328
18GR-01	18GR-01_30	384	196	0.1076	0.0025	0.01617	0.00017	2.3	103.7	2.3	103.4	1.1	133	50	103.4	1.1	0.289296
18GR-01	18GR-01_31	1310	731	0.0833	0.0018	0.01262	0.00018	1.6	81.2	1.6	80.8	1.1	102	41	80.8	1.1	0.492611
18GR-01	18GR-01_32	101	154	20.4	0.27	0.6156	0.0066	13	3108	13	3091	26	3124	12	3124	12	1.05634
18GR-01	18GR-01_33	805	213	12.16	0.1	0.401	0.026	7.9	2616.6	7.9	2150	130	3010	120	3010	120	28.5714
18GR-01	18GR-01_36	207.5	143.3	0.1937	0.006	0.02762	0.00034	5.1	179.3	5.1	175.6	2.2	226	60	175.6	2.2	2.06358
18GR-01	18GR-01_38	231	85.4	5.091	0.077	0.2993	0.005	13	1833	13	1687	25	2011	22	2011	22	16.1114
18GR-01	18GR-01_39	677.6	493	0.6024	0.0073	0.06847	0.00092	4.6	478.5	4.6	426.9	5.5	740	27	426.9	5.5	10.7837
18GR-01	18GR-01_40	85.6	66.5	15.08	0.13	0.5639	0.0048	7.9	2819.4	7.9	2882	20	2776	11	2776	11	3.81844
18GR-01	18GR-01_41	418	332	0.074	0.0025	0.01089	0.00012	2.3	72.4	2.3	69.85	0.74	133	58	69.85	0.74	3.5221
18GR-01	18GR-01_42	113.1	247	12.78	0.17	0.4932	0.0054	12	2663	12	2583	23	2732	16	2732	16	5.45388
18GR-01	18GR-01_43	732	27.6	0.463	0.011	0.0563	0.0013	7.9	385.7	7.9	353.2	7.9	581	79	353.2	7.9	8.42624	Rim
18GR-01	18GR-01_44	199	97	23.76	0.37	0.6599	0.0086	15	3255	15	3264	34	3249.4	9.9	3249.4	9.9	0.449314
18GR-01	18GR-01_45	299.2	371	0.0776	0.0023	0.01114	0.00015	2.2	75.8	2.2	71.39	0.97	212	60	71.39	0.97	5.81794
18GR-01	18GR-01_46	1620	775	0.0732	0.0012	0.011077	8.3e-05	1.1	71.7	1.1	71.01	0.53	103	36	71.01	0.53	0.962343
18GR-01	18GR-01_48	362.9	176.9	3.474	0.039	0.2489	0.0027	8.8	1520.4	8.8	1432	14	1647	15	1647	15	13.054
18GR-01	18GR-01_49	578	204	0.1031	0.0035	0.01381	0.00018	3.2	99.5	3.2	88.4	1.1	337	65	88.4	1.1	11.1558
18GR-01	18GR-01_50	294	216	4.346	0.039	0.3083	0.0023	7.3	1702.5	7.3	1732	12	1662	14	1662	14	4.21179
18GR-01	18GR-01_51	152	116	14.84	0.11	0.5523	0.0041	7	2804.1	7	2834	17	2777	10	2777	10	2.05257
18GR-01	18GR-01_52	281	294	17.54	0.23	0.5154	0.0066	12	2963	12	2678	28	3161.3	9.8	3161.3	9.8	15.288
18GR-01	18GR-01_54	111	40.4	1.894	0.028	0.1797	0.0019	9.8	1077.4	9.8	1065	10	1093	26	1093	26	2.56176
18GR-01	18GR-01_55	94.2	45.3	2.117	0.028	0.1984	0.0017	9.5	1154.5	9.5	1166.4	9.1	1122	26	1122	26	3.95722
18GR-01	18GR-01_56	256	69.3	10.27	0.16	0.4641	0.007	15	2456	15	2455	31	2450	11	2450	11	0.204082
18GR-01	18GR-01_57	122.7	70.7	2.033	0.025	0.1863	0.0014	8.5	1125.5	8.5	1101.1	7.4	1162	25	1162	25	5.24096
18GR-01	18GR-01_58	311	191	0.0504	0.0019	0.007685	8.4e-05	1.9	49.9	1.9	49.35	0.54	97	75	49.35	0.54	1.1022
18GR-01	18GR-01_59	142.3	39.6	4.841	0.036	0.3165	0.002	6.2	1792.3	6.2	1772.4	9.7	1806	13	1806	13	1.86047
18GR-01	18GR-01_60	186.8	92.3	2.794	0.033	0.2297	0.0021	8.6	1354	8.6	1332	11	1380	20	1380	20	3.47826
18GR-01	18GR-01_61	82.5	79.9	24.89	0.22	0.6722	0.0058	8.7	3302.8	8.7	3313	23	3290.8	9.1	3290.8	9.1	0.674608
18GR-01	18GR-01_62	54.3	46.3	21.18	0.33	0.6161	0.0073	15	3145	15	3093	29	3168	21	3168	21	2.36742
18GR-01	18GR-01_63	401	256.2	10.592	0.086	0.463	0.0031	7.7	2487.5	7.7	2453	14	2514.4	8.1	2514.4	8.1	2.44193	Core
18GR-01	18GR-01_63	436	36.8	4.967	0.068	0.3204	0.0043	12	1813	12	1791	21	1834	21	1834	21	2.3446	Rim
18GR-01	18GR-01_64	205.4	117.5	2.145	0.019	0.1984	0.0011	6.1	1162.7	6.1	1166.8	6	1149	16	1149	16	1.54917
18GR-01	18GR-01_65	269.6	206.6	0.0926	0.0035	0.0124	0.00015	3.2	89.7	3.2	79.42	0.96	335	76	79.42	0.96	11.4604
18GR-01	18GR-01_66	314	126	3.256	0.085	0.2271	0.006	20	1468	20	1318	31	1696	18	1696	18	22.2877	Core
18GR-01	18GR-01_66	2380	646	0.1066	0.0025	0.01585	0.0003	2.3	102.8	2.3	101.4	1.9	149	39	101.4	1.9	1.36187	Rim
18GR-01	18GR-01_67	631	500	0.1056	0.0021	0.01542	0.00012	1.9	101.9	1.9	98.66	0.75	173	42	98.66	0.75	3.17959
18GR-01	18GR-01_69	192.8	205.3	22.99	0.13	0.649	0.0041	5.4	3226	5.4	3224	16	3224.6	6.7	3224.6	6.7	0.018607
18GR-01	18GR-01_70	421.9	377.8	0.0743	0.0022	0.01127	0.00015	2.1	72.7	2.1	72.22	0.93	111	58	72.22	0.93	0.660248
18GR-01	18GR-01_71	289.5	307.3	13.439	0.08	0.5181	0.0032	5.6	2710.6	5.6	2691	14	2725.3	7.9	2725.3	7.9	1.25858
18GR-01	18GR-01_72	148.2	212	23.14	0.17	0.6531	0.0047	7.3	3232.3	7.3	3240	18	3229.6	8.8	3229.6	8.8	0.322021
18GR-01	18GR-01_73	573	521	0.3667	0.0053	0.04888	0.00046	3.9	317	3.9	307.6	2.8	378	34	307.6	2.8	2.9653
18GR-01	18GR-01_74	358	272	20.33	0.23	0.5707	0.0054	11	3105	11	2909	22	3240	13	3240	13	10.216
18GR-01	18GR-01_76	114.3	36.4	0.1186	0.0045	0.01756	0.00023	4.1	113.5	4.1	112.2	1.4	161	77	112.2	1.4	1.14537
18GR-01	18GR-01_77	157	72.2	24.71	0.17	0.6728	0.0047	6.8	3296.1	6.8	3316	18	3288	7	3288	7	0.851582
18GR-01	18GR-01_78	148.1	60.1	2.71	0.028	0.2288	0.0016	7.6	1330.2	7.6	1328.2	8.4	1335	19	1335	19	0.509363
18GR-01	18GR-01_80	202	107.7	21.94	0.17	0.5995	0.0046	7.5	3180	7.5	3027	18	3282.2	9.6	3282.2	9.6	7.77527
18GR-01	18GR-01_82	801	388.8	0.105	0.0019	0.01509	0.00014	1.7	101.3	1.7	96.52	0.91	216	38	96.52	0.91	4.71866
18GR-01	18GR-01_83	130	112	15.18	0.12	0.5672	0.0046	7.7	2825.5	7.7	2898	18	2777	11	2777	11	4.35722
18GR-01	18GR-01_84	580	366	14.406	0.066	0.5302	0.003	4.4	2776.6	4.4	2742	13	2805.5	6.7	2805.5	6.7	2.26341
18GR-01	18GR-01_85	160	29.6	2.527	0.024	0.2204	0.0018	6.7	1280.2	6.7	1283.9	9.7	1273	18	1273	18	0.856245
18GR-01	18GR-01_86	790	338	0.0999	0.0023	0.01508	0.00017	2.1	96.9	2.1	96.5	1	130	51	96.5	1	0.412797
18GR-01	18GR-01_87	82.8	65	1.764	0.027	0.1691	0.0017	10	1031	10	1007.2	9.2	1082	30	1082	30	6.91312
18GR-01	18GR-01_88	99.2	79.6	13.73	0.2	0.5207	0.0065	14	2729	14	2701	27	2753	13	2753	13	1.88885
18GR-01	18GR-01_89	651	437	0.1023	0.0019	0.01445	0.00012	1.8	98.9	1.8	92.47	0.76	252	45	92.47	0.76	6.50152
18GR-01	18GR-01_90	720	403.8	0.1041	0.0021	0.01509	0.00013	2	100.5	2	96.56	0.85	195	46	96.56	0.85	3.9204
18GR-01	18GR-01_91	859	666	0.105	0.002	0.01567	0.00016	1.8	101.3	1.8	100.2	1	130	38	100.2	1	1.08588
18GR-01	18GR-01_92	294.4	207.3	25.02	0.22	0.6459	0.0045	8.7	3308	8.7	3211	17	3368.9	8.7	3368.9	8.7	4.68699
18GR-01	18GR-01_94	425	281	0.089	0.0023	0.01336	0.00014	2.1	86.5	2.1	85.58	0.88	126	53	85.58	0.88	1.06358
18GR-01	18GR-01_95	364	270.4	0.073	0.0022	0.01126	0.00012	2	71.4	2	72.16	0.79	67	59	72.16	0.79	1.06443
18GR-01	18GR-01_96	187.9	95.8	0.0938	0.0034	0.01418	0.00018	3.2	90.8	3.2	90.8	1.2	102	71	90.8	1.2	0
18GR-01	18GR-01_97	195.5	88.7	2.662	0.038	0.2154	0.0025	10	1316	10	1257	13	1411	21	1411	21	10.9142
18GR-01	18GR-01_98	146.2	113.7	0.2811	0.0096	0.03987	0.00053	7.6	251	7.6	252	3.3	229	75	252	3.3	0.398406	Core
18GR-01	18GR-01_98	1030	84.3	0.1821	0.0045	0.02672	0.00037	3.8	169.7	3.8	170	2.3	167	45	170	2.3	0.176783	Rim
18GR-01	18GR-01_99	68.9	65	0.859	0.018	0.10218	0.00087	9.9	627.5	9.9	627.1	5.1	610	47	627.1	5.1	0.063745
18GR-01	18GR-01_100	370	172.9	2.281	0.031	0.203	0.0026	9.7	1204.7	9.7	1191	14	1221	19	1221	19	2.457
18GR-01	18GR-01_101	274	227	0.0759	0.0024	0.01136	0.00014	2.2	74.2	2.2	72.82	0.91	120	66	72.82	0.91	1.85984
18GR-01	18GR-01_102	546	412	0.4094	0.006	0.04946	0.00052	4.5	348.7	4.5	311.2	3.2	598	34	311.2	3.2	10.7542
18GR-01	18GR-01_103	187.3	73.8	0.1325	0.0051	0.01755	0.0004	4.6	126	4.6	112.1	2.6	362	77	112.1	2.6	11.0317
18GR-01	18GR-01_104	169.5	63	1.783	0.022	0.1731	0.0013	7.9	1038.1	7.9	1028.8	7.1	1042	26	1042	26	1.26679
18GR-01	18GR-01_105	462	376	0.0927	0.0026	0.01282	0.00016	2.5	89.9	2.5	82.1	1	274	59	82.1	1	8.67631
18GR-01	18GR-01_106	223	135	0.094	0.0041	0.01437	0.00022	3.8	91	3.8	91.9	1.4	84	87	91.9	1.4	0.989011
18GR-01	18GR-01_107	146.8	150.5	0.0716	0.0038	0.01107	0.00019	3.6	70	3.6	71	1.2	43	95	71	1.2	1.42857
18GR-01	18GR-01_108	189.8	77.4	1.825	0.021	0.1763	0.0015	7.5	1053.4	7.5	1046.6	8	1056	23	1056	23	0.890152
18GR-01	18GR-01_109	164.6	93.1	0.1737	0.0057	0.024	0.00029	4.9	162.2	4.9	152.9	1.8	273	68	152.9	1.8	5.73366
18GR-01	18GR-01_110	502	145	2.196	0.015	0.2001	0.0011	4.9	1179.4	4.9	1176	5.9	1175	13	1175	13	0.0851064
18GR-01	18GR-01_111	309	237	0.0829	0.0026	0.01169	0.00014	2.4	80.8	2.4	74.9	0.92	240	65	74.9	0.92	7.30198
18GR-01	18GR-01_112	205.2	87.1	5.004	0.038	0.3312	0.0019	6.4	1819.3	6.4	1844.1	9.3	1781	14	1781	14	3.54295
18GR-01	18GR-01_113	219.4	96.2	3.361	0.031	0.2585	0.0017	7.2	1494.5	7.2	1482.2	8.7	1505	16	1505	16	1.51495
18GR-01	18GR-01_114	317	210.3	3.974	0.038	0.2854	0.0026	7.7	1628	7.7	1618	13	1638	13	1638	13	1.221
18GR-01	18GR-01_115	306.5	279.5	21.68	0.17	0.6175	0.0044	7.4	3168.7	7.4	3099	18	3208.2	8.6	3208.2	8.6	3.40378
18GR-01	18GR-01_116	505	463	16.11	0.41	0.461	0.011	24	2874	24	2440	50	3200	12	3200	12	23.75
18GR-01	18GR-01_117	207.1	173.8	4.431	0.038	0.3019	0.002	7.1	1717.5	7.1	1700.7	9.7	1734	14	1734	14	1.92042
18GR-01	18GR-01_118	53.4	20.88	0.134	0.0089	0.01772	0.0004	7.8	126.7	7.8	113.2	2.5	320	120	113.2	2.5	10.6551
18GR-01	18GR-01_119	227.9	193	4.108	0.03	0.2945	0.0021	6	1655.3	6	1664	10	1643	13	1643	13	1.27815
18GR-01	18GR-01_120	72.3	44.7	13.29	0.16	0.5091	0.006	11	2699	11	2652	26	2734	16	2734	16	2.99927	Core
18GR-01	18GR-01_120	395	240	0.056	0.0057	0.00802	0.00027	5.5	55.2	5.5	51.5	1.7	210	190	51.5	1.7	6.7029	Rim
18GR-01	18GR-01_122	458	349	0.0779	0.002	0.01187	0.0001	1.9	76.1	1.9	76.04	0.64	89	53	76.04	0.64	0.0788436
18GR-01	18GR-01_124	431	178.8	3.467	0.028	0.2682	0.0021	6.5	1519.2	6.5	1532	11	1500	14	1500	14	2.13333
18GR-01	18GR-01_126	621	421	0.0758	0.0017	0.01141	0.0001	1.6	74.1	1.6	73.12	0.66	121	46	73.12	0.66	1.32254
18GR-01	18GR-01_128	240.2	210	0.0765	0.003	0.01149	0.00014	2.7	75	2.7	73.64	0.92	114	74	73.64	0.92	1.81333
18GR-01	18GR-01_129	117.9	252	23.53	0.15	0.6617	0.0044	6.2	3248.5	6.2	3273	17	3235	8.9	3235	8.9	1.17465
18GR-01	18GR-01_130	191	100.2	0.7199	0.0099	0.0895	0.00076	5.8	550	5.8	552.5	4.5	540	31	552.5	4.5	0.454545
18GR-01	18GR-01_131	422	145	0.0521	0.0018	0.00818	0.00011	1.7	51.5	1.7	52.54	0.73	40	65	52.54	0.73	2.01942
18GR-01	18GR-01_132	66	52.2	1.792	0.028	0.1721	0.0014	10	1041	10	1023.7	8	1075	31	1075	31	4.77209
18GR-01	18GR-01_133	248.4	104.5	0.1059	0.0027	0.01595	0.00017	2.5	102.1	2.5	102	1.1	122	55	102	1.1	0.0979432
18GR-01	18GR-01_134	841	842	0.0723	0.0019	0.01031	0.0001	1.8	70.8	1.8	66.12	0.65	223	52	66.12	0.65	6.61017
18GR-01	18GR-01_135	325.1	269.2	21.55	0.2	0.6122	0.0048	9	3162.7	9	3078	19	3220.8	8.9	3220.8	8.9	4.43368
18GR-01	18GR-01_136	335.9	332	21.05	0.23	0.6069	0.0057	11	3139	11	3056	23	3198.2	8.8	3198.2	8.8	4.44625
18GR-01	18GR-01_137	206.7	334	3.26	0.074	0.225	0.0059	17	1467	17	1306	31	1722	19	1722	19	24.158
18GR-01	18GR-01_138	246	141.3	1.989	0.023	0.1845	0.0015	7.5	1111.7	7.5	1091.1	8.2	1149	20	1149	20	5.03916
18GR-01	18GR-01_140	132	99.7	1.682	0.02	0.1695	0.0015	7.7	1000.8	7.7	1009	8	989	24	989	24	2.02224
18GR-01	18GR-01_141	103	52.5	5.01	0.055	0.3187	0.0032	9.1	1820.7	9.1	1783	16	1867	16	1867	16	4.4992
18GR-01	18GR-01_142	362.9	43.4	1.97	0.018	0.1906	0.0014	6.1	1104.8	6.1	1124.5	7.6	1074	16	1074	16	4.70205
18GR-01	18GR-01_143	185	67.2	31.02	0.2	0.7361	0.0051	6.3	3519.1	6.3	3555	19	3505.9	6.8	3505.9	6.8	1.4005
18GR-01	18GR-01_144	178	157.3	0.0815	0.004	0.01155	0.00019	3.7	79.3	3.7	74	1.2	222	93	74	1.2	6.68348
18GR-01	18GR-01_146	315.9	105.9	23.04	0.16	0.6481	0.0042	6.8	3228	6.8	3220	16	3237.1	8.2	3237.1	8.2	0.528251
18GR-01	18GR-01_147	204.4	366	14.3	0.12	0.5358	0.0047	7.7	2768.7	7.7	2765	20	2777	14	2777	14	0.432121
18GR-01	18GR-01_148	166.1	49	3.852	0.033	0.2816	0.0017	7	1602.9	7	1599	8.6	1612	16	1612	16	0.806452
18GR-01	18GR-01_149	142	78.9	5.576	0.063	0.3472	0.0035	9.7	1910.7	9.7	1923	17	1902	17	1902	17	1.1041
18GR-01	18GR-01_150	75.7	8	6.04	0.075	0.2992	0.0029	11	1980	11	1689	14	2304	17	2304	17	26.6927
18GR-02	18GR-02_2	153.5	80.9	0.104	0.0058	0.01475	0.00035	5.3	99.9	5.3	94.4	2.3	220	100	94.4	2.3	5.50551
18GR-02	18GR-02_3	357	204.3	0.074	0.003	0.01075	0.00016	2.8	72.3	2.8	68.9	1	204	84	68.9	1	4.70263
18GR-02	18GR-02_4	319	196	0.0721	0.0029	0.01108	0.00019	2.8	70.6	2.8	71	1.2	91	74	71	1.2	0.566572
18GR-02	18GR-02_5	183	47.5	4.958	0.056	0.3021	0.0029	9.4	1811.7	9.4	1701	14	1945	16	1945	16	12.545
18GR-02	18GR-02_6	274.3	233	21.3	0.21	0.6068	0.005	10	3150	10	3056	20	3213.3	9.4	3213.3	9.4	4.89528
18GR-02	18GR-02_7	175	51	23.73	0.42	0.625	0.01	18	3252	18	3124	41	3336.3	8.9	3336.3	8.9	6.36334
18GR-02	18GR-02_8	303	180.2	20.02	0.2	0.5472	0.0045	9.8	3090.9	9.8	2813	19	3277.9	9.7	3277.9	9.7	14.1829
18GR-02	18GR-02_9	1360	482	0.0889	0.0021	0.01375	0.00013	1.9	86.5	1.9	88.01	0.85	54	44	88.01	0.85	1.74566
18GR-02	18GR-02_10	1114	448.9	0.1033	0.0021	0.01521	0.00013	1.9	99.7	1.9	97.28	0.83	163	41	97.28	0.83	2.42728
18GR-02	18GR-02_11	486	80.7	6.467	0.045	0.3636	0.0024	6.2	2040.9	6.2	1999	11	2087	12	2087	12	4.21658
18GR-02	18GR-02_12	772	746	0.0775	0.0021	0.01152	0.00011	1.9	75.7	1.9	73.81	0.72	133	54	73.81	0.72	2.4967
18GR-02	18GR-02_13	638	910	8.91	0.27	0.387	0.011	29	2319	29	2105	53	2525.6	8.7	2525.6	8.7	16.6535
18GR-02	18GR-02_14	348	71.2	1.675	0.016	0.166	0.0013	6.1	998.5	6.1	989.6	7.1	1022	19	1022	19	3.17025
18GR-02	18GR-02_15	119.8	77.6	10.05	0.12	0.4362	0.0048	11	2437	11	2332	22	2529	14	2529	14	7.78964
18GR-02	18GR-02_16	678	715	0.0768	0.0022	0.01144	0.00012	2.1	75.1	2.1	73.35	0.79	135	58	73.35	0.79	2.33023
18GR-02	18GR-02_17	338	108.3	20.87	0.17	0.6052	0.0048	8.1	3131.6	8.1	3050	20	3184	10	3184	10	4.20854
18GR-02	18GR-02_18	174	49.5	18.63	0.38	0.5599	0.0071	20	3017	20	2864	29	3124	29	3124	29	8.32266
18GR-02	18GR-02_20	374.1	316	23.08	0.23	0.6248	0.0045	9.2	3231.7	9.2	3128	18	3295	11	3295	11	5.06829
18GR-02	18GR-02_21	300	125.1	4.312	0.049	0.2907	0.0027	9.5	1694.7	9.5	1645	13	1758	18	1758	18	6.42776
18GR-02	18GR-02_22	252	110.7	11.36	0.14	0.4353	0.0053	12	2552	12	2329	24	2738	12	2738	12	14.9379
18GR-02	18GR-02_23	243.6	141.9	0.0839	0.0034	0.01308	0.00021	3.2	81.6	3.2	83.7	1.4	52	79	83.7	1.4	2.57353
18GR-02	18GR-02_24	134	150	1.735	0.028	0.1708	0.0016	10	1021	10	1016.2	8.6	1029	30	1029	30	1.24393
18GR-02	18GR-02_25	364.6	334	0.0804	0.003	0.01127	0.00014	2.7	78.7	2.7	72.24	0.92	269	74	72.24	0.92	8.20839
18GR-02	18GR-02_26	458	202	23.58	0.65	0.565	0.015	28	3239	28	2878	61	3472	18	3472	18	17.1083
18GR-02	18GR-02_27	242	182	12.81	0.3	0.479	0.011	22	2664	22	2516	47	2775	13	2775	13	9.33333
18GR-02	18GR-02_28	111.4	96.9	2.774	0.042	0.2185	0.0023	11	1346	11	1274	12	1462	26	1462	26	12.8591
18GR-02	18GR-02_29	79.4	17.7	10.55	0.14	0.4538	0.0046	12	2482	12	2413	20	2534	16	2534	16	4.77506
18GR-02	18GR-02_30	769	609	0.1	0.0022	0.0151	0.00013	2	96.7	2	96.58	0.82	102	44	96.58	0.82	0.124095
18GR-02	18GR-02_31	97.9	43.8	1.998	0.03	0.182	0.002	10	1113	10	1077	11	1174	31	1174	31	8.26235
18GR-02	18GR-02_32	384	132.1	27.19	0.33	0.6784	0.0092	12	3389	12	3336	35	3426	17	3426	17	2.62697
18GR-02	18GR-02_33	388	287	0.1026	0.0035	0.01559	0.0002	3.2	99	3.2	99.7	1.3	96	70	99.7	1.3	0.707071
18GR-02	18GR-02_35	455	517	20.46	0.16	0.5789	0.0043	7.5	3112.7	7.5	2946	18	3215	10	3215	10	8.36703
18GR-02	18GR-02_36	399	166.1	0.0502	0.0024	0.00765	0.00012	2.4	49.6	2.4	49.12	0.75	83	92	49.12	0.75	0.967742
18GR-02	18GR-02_38	207.9	126	0.003	0.0014	1.6e-05	1.5e-05	1.5	3	1.5	0.1	0.099	-22000	13000	0.1	0.099	96.6667
18GR-02	18GR-02_39	268	135.4	5.832	0.049	0.3441	0.0021	7.3	1950.4	7.3	1906	10	1989	13	1989	13	4.17295
18GR-02	18GR-02_40	90	48.7	15.92	0.74	0.456	0.021	50	2849	50	2401	95	3195	14	3195	14	24.8513
18GR-02	18GR-02_41	215	207	14.33	0.088	0.5364	0.0031	5.8	2771.3	5.8	2768	13	2766	11	2766	11	0.0723066
18GR-02	18GR-02_42	392.9	220	18.56	0.32	0.5403	0.0081	25	3007	25	2782	35	3158	22	3158	22	11.9063
18GR-02	18GR-02_43	226	128.9	1.789	0.024	0.1749	0.0015	8.6	1040.2	8.6	1038.6	8.3	1041	26	1041	26	0.230548
18GR-02	18GR-02_44	130.4	200.4	0.599	0.021	0.06536	0.00097	13	474	13	408.1	5.9	829	91	408.1	5.9	13.903
18GR-02	18GR-02_45	284	133.4	4.612	0.049	0.3052	0.0028	8.9	1749.9	8.9	1716	14	1791	15	1791	15	4.1876
18GR-02	18GR-02_46	120	177.4	1.562	0.036	0.1554	0.0025	14	953	14	931	14	995	42	995	42	6.43216
18GR-02	18GR-02_47	614	71.7	12.24	0.11	0.5037	0.0033	8.7	2622.3	8.7	2629	14	2615	13	2615	13	0.535373
18GR-02	18GR-02_48	226	181	0.0844	0.0041	0.01261	0.00018	3.9	82	3.9	80.8	1.2	122	94	80.8	1.2	1.46341
18GR-02	18GR-02_49	206.3	149.5	0.0186	0.0034	0.001292	6e-05	3.3	18.5	3.3	8.32	0.39	870	310	8.32	0.39	55.027
18GR-02	18GR-02_50	137.6	60.3	21.61	0.38	0.617	0.011	18	3164	18	3094	44	3208	19	3208	19	3.55362
18GR-02	18GR-02_51	350	168	0.0495	0.0027	0.00735	0.00015	2.6	49	2.6	47.2	0.96	130	110	47.2	0.96	3.67347
18GR-02	18GR-02_52	304.6	348.6	11.15	0.15	0.429	0.0057	12	2534	12	2300	26	2716	12	2716	12	15.3166
18GR-02	18GR-02_53	76.7	1.2	18.48	0.32	0.5346	0.0075	16	3014	16	2759	32	3186	17	3186	17	13.4024
18GR-02	18GR-02_54	161	180	3.801	0.044	0.2687	0.0027	9.3	1591.8	9.3	1534	14	1667	19	1667	19	7.9784
18GR-02	18GR-02_56	547	594	0.0781	0.0029	0.0114	0.00017	2.8	76.5	2.8	73.1	1.1	157	74	73.1	1.1	4.44444
18GR-02	18GR-02_57	2660	957	0.1092	0.0013	0.01606	0.00011	1.2	105.2	1.2	102.7	0.7	158	27	102.7	0.7	2.37643
18GR-02	18GR-02_58	287	182.9	0.0909	0.0035	0.01355	0.00019	3.3	88.2	3.3	86.8	1.2	128	76	86.8	1.2	1.5873
18GR-02	18GR-02_59	491	252.9	0.4735	0.0075	0.06051	0.00059	5.2	393.3	5.2	378.7	3.6	466	35	378.7	3.6	3.71218
18GR-02	18GR-02_60	489	107	1.427	0.039	0.1452	0.0036	18	902	18	873	20	969	21	969	21	9.90712
18GR-02	18GR-02_61	982	322	0.1004	0.0019	0.01494	0.00013	1.8	97.1	1.8	95.58	0.85	130	42	95.58	0.85	1.5654
18GR-02	18GR-02_62	249.8	167.2	21.34	0.21	0.6025	0.0056	9.5	3154	9.5	3039	23	3228	11	3228	11	5.85502
18GR-02	18GR-02_63	730	277	0.1003	0.0021	0.01511	0.00015	1.9	96.9	1.9	96.68	0.95	108	46	96.68	0.95	0.227038
18GR-02	18GR-02_64	116	55.7	1.624	0.024	0.1609	0.0015	9.1	977.9	9.1	961.9	8.1	1011	29	1011	29	4.85658
18GR-02	18GR-02_65	271	138.4	13.339	0.09	0.5106	0.004	6.5	2704.1	6.5	2659	17	2737	11	2737	11	2.84984
18GR-02	18GR-02_66	461	49.6	13.254	0.071	0.5134	0.0033	5.1	2697.4	5.1	2671	14	2716.3	8.7	2716.3	8.7	1.66771
18GR-02	18GR-02_67	98.1	57.7	14.14	0.18	0.5291	0.0068	13	2756	13	2739	28	2775	20	2775	20	1.2973
18GR-02	18GR-02_68	308.9	113	24.86	0.44	0.6621	0.0085	18	3300	18	3279	32	3317	14	3317	14	1.14561
18GR-02	18GR-02_69	495	222.5	0.1079	0.0048	0.01579	0.00058	4.4	103.7	4.4	101	3.7	213	80	101	3.7	2.60366
18GR-02	18GR-02_70	159.3	136.9	14.55	0.11	0.5479	0.004	7.1	2785.2	7.1	2816	17	2767	10	2767	10	1.77087
18GR-02	18GR-02_71	770	24.4	10.62	0.17	0.411	0.025	14	2491	14	2190	120	2760	120	2760	120	20.6522
18GR-02	18GR-02_72	116	149	1.84	0.031	0.1767	0.0016	11	1057	11	1048.8	8.8	1083	32	1083	32	3.15789
18GR-02	18GR-02_73	139.3	60.8	21.49	0.25	0.611	0.0055	12	3159	12	3073	22	3216	13	3216	13	4.44652
18GR-02	18GR-02_74	252.8	60.2	4.45	0.051	0.2989	0.0027	9.4	1720.4	9.4	1685	14	1778	21	1778	21	5.2306
18GR-02	18GR-02_75	57.7	37.81	10.06	0.13	0.456	0.0047	12	2439	12	2421	21	2462	17	2462	17	1.66531
18GR-02	18GR-02_76	109.3	60.3	3.889	0.049	0.2786	0.0024	10	1610	10	1584	12	1654	22	1654	22	4.23216
18GR-02	18GR-02_77	74.5	30.4	1.598	0.03	0.161	0.0017	12	967	12	962	9.4	988	37	988	37	2.63158
18GR-02	18GR-02_78	912	407	0.052	0.0015	0.008076	9e-05	1.4	51.5	1.4	51.85	0.57	60	56	51.85	0.57	0.679612
18GR-02	18GR-02_79	311	258	0.1018	0.0054	0.01556	0.00031	5	98	5	99.6	2	110	100	99.6	2	1.63265
18GR-02	18GR-02_81	163.9	131.9	21.93	0.15	0.6233	0.004	6.8	3179.8	6.8	3122	16	3215.2	9.5	3215.2	9.5	2.89873
18GR-02	18GR-02_82	398	275	0.1117	0.0034	0.01641	0.0002	3.1	107.4	3.1	104.9	1.2	160	64	104.9	1.2	2.32775
18GR-02	18GR-02_83	451	441	0.0998	0.0029	0.01458	0.00019	2.6	96.5	2.6	93.3	1.2	191	64	93.3	1.2	3.31606
18GR-02	18GR-02_84	147	78.4	12.77	0.27	0.4962	0.0078	20	2658	20	2595	34	2710	17	2710	17	4.24354
18GR-02	18GR-02_85	174.6	67.2	2.905	0.035	0.229	0.0018	9.1	1382.2	9.1	1328.8	9.5	1467	19	1467	19	9.42059
18GR-02	18GR-02_86	537	136.1	2.601	0.094	0.2035	0.0068	25	1302	25	1192	36	1486	36	1486	36	19.7847
18GR-02	18GR-02_87	111.7	43.6	0.1315	0.0079	0.01886	0.00035	7	124.7	7	120.4	2.2	190	120	120.4	2.2	3.44828
18GR-02	18GR-02_88	1448	564	0.1068	0.0017	0.01611	0.00019	1.6	103	1.6	103	1.2	121	34	103	1.2	0
18GR-02	18GR-02_89	380	359	20.55	0.23	0.5935	0.0054	11	3116	11	3003	22	3191.4	9.4	3191.4	9.4	5.90337
18GR-02	18GR-02_90	668	465	0.0756	0.0022	0.01156	0.00014	2.1	73.9	2.1	74.09	0.9	86	57	74.09	0.9	0.257104
18GR-02	18GR-02_91	1278	1209	0.02546	0.00091	0.003615	5.5e-05	0.93	25.64	0.93	23.26	0.35	267	80	23.26	0.35	9.28237
18GR-02	18GR-02_94	390	203	0.2896	0.0063	0.04036	0.00038	5	257.8	5	255	2.4	286	45	255	2.4	1.08611
18GR-02	18GR-02_95	276	138.4	0.1883	0.005	0.02681	0.00034	4.3	174.9	4.3	170.6	2.1	244	56	170.6	2.1	2.45855
18GR-02	18GR-02_96	323	83.2	4.977	0.036	0.3268	0.0025	6.1	1814.8	6.1	1822	12	1808	14	1808	14	0.774336
18GR-02	18GR-02_97	759	139.7	10.47	0.11	0.4102	0.0039	9.5	2475.7	9.5	2215	18	2696.9	7.8	2696.9	7.8	17.8687
18GR-02	18GR-02_99	259	152.9	1.348	0.036	0.1214	0.0018	15	865	15	738	10	1201	37	738	10	14.6821
18GR-02	18GR-02_100	69.5	44.6	4.082	0.076	0.2889	0.0037	15	1648	15	1635	18	1655	27	1655	27	1.20846
18GR-02	18GR-02_101	89.2	30.24	12.13	0.15	0.502	0.0052	12	2615	12	2621	22	2611	15	2611	15	0.382995
18GR-02	18GR-02_102	435	246	14.75	0.18	0.5421	0.0055	11	2798	11	2791	23	2805	14	2805	14	0.499109
18GR-02	18GR-02_103	404	159	21.88	0.18	0.6316	0.0049	7.9	3177.6	7.9	3155	19	3195.2	9.7	3195.2	9.7	1.25814
18GR-02	18GR-02_104	121.7	103.7	12.44	0.18	0.491	0.0064	14	2635	14	2573	28	2686	24	2686	24	4.207
18GR-02	18GR-02_105	168.2	71.9	1.823	0.022	0.1754	0.0011	8	1052.6	8	1041.7	6.2	1077	24	1077	24	3.27762
18GR-02	18GR-02_106	154.2	183	26.21	0.22	0.6954	0.0064	8	3353.6	8	3402	24	3325	13	3325	13	2.31579
18GR-02	18GR-02_107	341	101.8	3.117	0.034	0.2529	0.0025	8.4	1435.7	8.4	1453	13	1413	18	1413	18	2.83086
18GR-02	18GR-02_108	392	185.4	1.798	0.039	0.1745	0.0042	14	1042	14	1040	24	1048	42	1048	42	0.763359
18GR-02	18GR-02_109	494	316	0.1095	0.0053	0.01597	0.00023	4.8	105.3	4.8	102.1	1.5	190	97	102.1	1.5	3.03894
18GR-02	18GR-02_111	384	164	17.59	0.46	0.531	0.011	25	2959	25	2741	48	3118	17	3118	17	12.0911
18GR-02	18GR-02_112	429	144.3	1.76	0.019	0.1725	0.0013	7.1	1030.2	7.1	1025.9	7.2	1040	20	1040	20	1.35577
18GR-02	18GR-02_113	326.4	233.6	0.6982	0.0092	0.08591	0.0007	5.5	537.1	5.5	531.3	4.2	566	29	531.3	4.2	1.07987
18GR-02	18GR-02_115	181	33.2	20.06	0.79	0.59	0.014	42	3074	42	2984	57	3152	33	3152	33	5.32995
18GR-02	18GR-02_116	186.8	106.7	2.019	0.033	0.1789	0.0017	11	1120	11	1060.9	9	1246	31	1246	31	14.8555
18GR-02	18GR-02_117	574	571	0.0804	0.0032	0.01193	0.00023	3	78.5	3	76.4	1.4	150	87	76.4	1.4	2.67516
18GR-02	18GR-02_118	370	239.3	0.1112	0.0036	0.01628	0.00022	3.3	106.9	3.3	104.1	1.4	168	62	104.1	1.4	2.61927
18GR-02	18GR-02_119	535	274	2.99	0.088	0.2091	0.0031	23	1398	23	1223	17	1691	40	1691	40	27.6759
18GR-02	18GR-02_120	319	91.1	10.96	0.13	0.4619	0.0041	11	2518	11	2447	18	2573	15	2573	15	4.89701
18GR-02	18GR-02_121	167	101.3	2.514	0.042	0.2185	0.0025	12	1274	12	1274	13	1274	28	1274	28	0
18GR-02	18GR-02_122	1304	845	0.3773	0.0056	0.04653	0.0004	4.1	324.8	4.1	293.1	2.4	543	36	293.1	2.4	9.75985
18GR-02	18GR-02_123	385	149.2	4.768	0.036	0.319	0.0023	6.3	1778.7	6.3	1785	11	1766	13	1766	13	1.07588
18GR-02	18GR-02_124	109.1	87.7	11.87	0.17	0.4768	0.0054	13	2592	13	2517	25	2647	18	2647	18	4.91122
18GR-02	18GR-02_125	368	246	4.441	0.034	0.2977	0.0021	6.4	1719.3	6.4	1680	10	1760	12	1760	12	4.54545
18GR-02	18GR-02_126	196.7	143.5	4.033	0.036	0.2854	0.0019	7	1641	7	1618.3	9.6	1661	16	1661	16	2.57074
18GR-02	18GR-02_127	107.1	197.3	8.02	0.1	0.346	0.0038	11	2232	11	1915	18	2534	16	2534	16	24.4278
18GR-02	18GR-02_128	50.4	36.9	2.996	0.054	0.2314	0.0033	14	1407	14	1341	17	1506	35	1506	35	10.9562
18GR-02	18GR-02_129	94.7	62.6	13.72	0.14	0.5253	0.0049	10	2731	10	2721	21	2731	16	2731	16	0.366166
18GR-02	18GR-02_130	141.2	137.1	13.01	0.23	0.4954	0.0058	17	2678	17	2593	25	2736	20	2736	20	5.22661
18GR-02	18GR-02_131	122.4	56	2.083	0.036	0.1835	0.0022	12	1141	12	1086	12	1240	36	1240	36	12.4194
18GR-02	18GR-02_132	127	62.1	8.64	0.21	0.4059	0.0073	25	2293	25	2193	34	2381	22	2381	22	7.89584
18GR-02	18GR-02_133	808	169.4	1.142	0.026	0.1081	0.0021	12	776	12	662	12	1109	32	662	12	14.6907
18GR-02	18GR-02_134	266	230	0.0827	0.0037	0.01174	0.00019	3.5	80.4	3.5	75.2	1.2	230	93	75.2	1.2	6.46766
18GR-02	18GR-02_135	48	46.6	0.785	0.027	0.0905	0.0016	15	585	15	558	9.5	663	71	558	9.5	4.61538
18GR-02	18GR-02_136	429	328	2.169	0.031	0.1865	0.0022	10	1169	10	1102	12	1301	29	1301	29	15.2959
18GR-02	18GR-02_137	790	202.3	1.705	0.02	0.1655	0.0016	7.5	1009.4	7.5	987	9.1	1057	20	1057	20	6.62252
18GR-02	18GR-02_138	227	110.4	2.229	0.035	0.2013	0.0026	11	1189	11	1182	14	1202	22	1202	22	1.66389
18GR-02	18GR-02_139	86.1	3.46	4.072	0.068	0.2728	0.0026	13	1646	13	1555	13	1770	28	1770	28	12.1469
18GR-02	18GR-02_140	184.1	82.2	3.984	0.048	0.2761	0.0023	9.5	1629.6	9.5	1572	12	1700	20	1700	20	7.52941
18GR-02	18GR-02_141	197	173	25.41	0.16	0.6805	0.0043	6.3	3323.4	6.3	3346	17	3311.5	8.5	3311.5	8.5	1.04182
18GR-02	18GR-02_143	115	87.7	13.09	0.15	0.5013	0.0062	11	2685	11	2618	26	2739	17	2739	17	4.41767
18GR-02	18GR-02_144	222.3	216	23.6	0.28	0.624	0.008	11	3252	11	3124	32	3330	12	3330	12	6.18619
18GR-02	18GR-02_145	209	210	5.052	0.05	0.3321	0.0023	8.3	1827.1	8.3	1848	11	1805	17	1805	17	2.38227
18GR-02	18GR-02_146	89.6	73.6	14.46	0.14	0.5463	0.0051	9	2779.4	9	2809	21	2763	14	2763	14	1.66486
18GR-02	18GR-02_147	339.7	247	21.69	0.17	0.6223	0.0047	7.6	3169.1	7.6	3118	19	3203.5	7.9	3203.5	7.9	2.66896
18GR-02	18GR-02_149	40.3	77.4	9.44	0.14	0.398	0.0051	14	2380	14	2159	23	2579	21	2579	21	16.2854
18JR-01	18JR-01_1	320	310	0.0956	0.0059	0.01228	0.00017	5.4	92.2	5.4	78.7	1.1	420	120	78.7	1.1	14.6421
18JR-01	18JR-01_2	582	34.1	9.02	0.14	0.3682	0.0054	16	2338	16	2020	26	2609	22	2609	22	22.5757
18JR-01	18JR-01_3	182.3	152	0.883	0.012	0.10468	0.00072	6.5	641.6	6.5	641.7	4.2	631	28	641.7	4.2	0.015586
18JR-01	18JR-01_4	366.5	283.6	0.01132	0.00084	0.001648	4.2e-05	0.85	11.41	0.85	10.62	0.27	150	140	10.62	0.27	6.92375
18JR-01	18JR-01_5	224.8	134.8	5.697	0.067	0.3358	0.0036	10	1930	10	1866	17	1999	14	1999	14	6.65333
18JR-01	18JR-01_7	230	145.8	0.0749	0.0027	0.01177	0.00018	2.6	73.2	2.6	75.4	1.1	66	76	75.4	1.1	3.00546
18JR-01	18JR-01_8	670	205	0.0762	0.0034	0.0118	0.00021	3.2	74.5	3.2	75.6	1.3	44	80	75.6	1.3	1.47651	Rim
18JR-01	18JR-01_9	164.2	218	0.0847	0.0039	0.01243	0.00018	3.6	82.3	3.6	79.6	1.2	155	88	79.6	1.2	3.28068
18JR-01	18JR-01_10	187	36.2	4.805	0.047	0.3169	0.0028	8.2	1784.6	8.2	1774	14	1798	12	1798	12	1.33482
18JR-01	18JR-01_11	1140	209	0.0791	0.0023	0.01195	0.00012	2.2	77.2	2.2	76.58	0.73	86	54	76.58	0.73	0.803109
18JR-01	18JR-01_13	557	529	0.0778	0.0024	0.01202	0.00015	2.3	76	2.3	77	0.97	72	61	77	0.97	1.31579
18JR-01	18JR-01_14	187.2	153.9	0.0768	0.0032	0.01184	0.00015	3	75	3	75.9	0.98	71	80	75.9	0.98	1.2
18JR-01	18JR-01_15	124.6	71.6	0.0732	0.0038	0.01131	0.00022	3.6	71.5	3.6	72.5	1.4	80	100	72.5	1.4	1.3986
18JR-01	18JR-01_16	119.7	46.3	0.0825	0.0042	0.01184	0.00021	3.9	80.2	3.9	75.9	1.3	250	110	75.9	1.3	5.3616
18JR-01	18JR-01_17	394	202	3.319	0.055	0.2678	0.0047	13	1484	13	1528	24	1460	42	1460	42	4.65753
18JR-01	18JR-01_18	698	332	0.0723	0.0015	0.01095	0.00012	1.4	70.8	1.4	70.23	0.73	109	45	70.23	0.73	0.805085
18JR-01	18JR-01_19	320	274	0.0765	0.0032	0.01188	0.00019	3	74.8	3	76.2	1.2	72	84	76.2	1.2	1.87166
18JR-01	18JR-01_20	379	106.6	3.984	0.038	0.2874	0.0027	7.9	1630.3	7.9	1628	14	1640	15	1640	15	0.731707
18JR-01	18JR-01_22	155.7	148.8	12.88	0.14	0.5025	0.0048	10	2669	10	2627	21	2704	11	2704	11	2.84763
18JR-01	18JR-01_23	557	362	0.0829	0.0021	0.01239	0.00013	1.9	80.8	1.9	79.35	0.82	133	57	79.35	0.82	1.79455
18JR-01	18JR-01_24	258	93	9.9	0.27	0.474	0.016	26	2423	26	2498	69	2381	36	2381	36	4.9139	Core
18JR-01	18JR-01_24	623	41.5	3.926	0.059	0.2635	0.0037	12	1617	12	1507	19	1770	14	1770	14	14.8588	Rim
18JR-01	18JR-01_25	773	226	4.034	0.059	0.2662	0.0037	12	1641	12	1521	19	1797	13	1797	13	15.3589	Core
18JR-01	18JR-01_25	1390	594	0.0831	0.0062	0.01187	0.00047	5.7	80.9	5.7	76.1	3	215	94	76.1	3	5.93325	Rim
18JR-01	18JR-01_26	75	31.1	4.76	0.063	0.304	0.0035	11	1776	11	1710	17	1858	20	1858	20	7.96555
18JR-01	18JR-01_27	98.9	48	1.62	0.026	0.1576	0.0016	10	978	10	943.4	9.2	1058	32	1058	32	10.8318
18JR-01	18JR-01_28	265.1	82.1	4.537	0.042	0.31	0.0019	7.6	1736.9	7.6	1740.7	9.4	1733	13	1733	13	0.444316
18JR-01	18JR-01_29	1008	112.6	3.276	0.087	0.2196	0.0052	21	1470	21	1278	28	1769	16	1769	16	27.7558
18JR-01	18JR-01_30	369	752	3.879	0.031	0.2812	0.002	6.4	1608.6	6.4	1597	10	1628	12	1628	12	1.90418
18JR-01	18JR-01_31	48.7	32.9	13.69	0.15	0.5178	0.0055	11	2727	11	2688	23	2758	14	2758	14	2.53807
18JR-01	18JR-01_32	443	328	0.0789	0.0024	0.01167	0.00013	2.3	77	2.3	74.8	0.82	159	59	74.8	0.82	2.85714
18JR-01	18JR-01_33	82.08	1.3	4.462	0.057	0.3012	0.0035	11	1723	11	1697	17	1763	25	1763	25	3.74362
18JR-01	18JR-01_34	195	177	0.0777	0.0034	0.01164	0.00018	3.2	75.8	3.2	74.6	1.1	124	84	74.6	1.1	1.58311
18JR-01	18JR-01_35	386	296	0.089	0.0029	0.01219	0.00015	2.7	86.4	2.7	78.09	0.96	308	68	78.09	0.96	9.61806
18JR-01	18JR-01_37	896	676	5.421	0.058	0.3162	0.0033	9.2	1886.8	9.2	1770	16	2023	10	2023	10	12.5062
18JR-01	18JR-01_38	362	75.2	4.381	0.037	0.3001	0.0024	7.2	1709	7.2	1691	12	1734	14	1734	14	2.47982
18JR-01	18JR-01_39	587	93.8	9.97	0.16	0.4386	0.0073	15	2428	15	2342	33	2511	11	2511	11	6.73039
18JR-01	18JR-01_40	124.2	28.6	24.14	0.22	0.6512	0.0062	8.8	3272.9	8.8	3231	24	3302	10	3302	10	2.15021
18JR-01	18JR-01_43	264	230	0.0899	0.0036	0.01194	0.00016	3.3	87.2	3.3	76.5	1	353	83	76.5	1	12.2706
18JR-01	18JR-01_44	454	468.3	13.14	0.11	0.4926	0.0034	7.9	2689.2	7.9	2581	15	2771	9.8	2771	9.8	6.85673	Core
18JR-01	18JR-01_44	677	249	0.0736	0.0066	0.01135	0.00038	6.3	72	6.3	72.7	2.4	90	190	72.7	2.4	0.972222	Rim
18JR-01	18JR-01_45	230.2	149.8	9.72	0.11	0.4393	0.0047	9.4	2409	9.4	2346	21	2455	15	2455	15	4.43992
18JR-01	18JR-01_46	366	64	4.516	0.083	0.2837	0.0047	16	1730	16	1608	24	1888	15	1888	15	14.8305
18JR-01	18JR-01_47	318	185.7	0.0977	0.0029	0.01435	0.00017	2.6	94.5	2.6	91.8	1.1	169	61	91.8	1.1	2.85714
18JR-01	18JR-01_48	148.4	68	3.131	0.029	0.2496	0.0018	7.1	1439.5	7.1	1436.3	9.2	1443	19	1443	19	0.46431
18JR-01	18JR-01_49	551	583	14.61	0.24	0.545	0.011	15	2789	15	2801	46	2777	21	2777	21	0.864242
18JR-01	18JR-01_50	175.1	188.1	0.0796	0.0035	0.01153	0.00017	3.2	77.6	3.2	73.9	1.1	197	90	73.9	1.1	4.76804
18JR-01	18JR-01_51	514	335	10.78	0.082	0.4781	0.004	7	2503.6	7	2519	17	2494	11	2494	11	1.00241
18JR-01	18JR-01_52	339	266	0.0882	0.0034	0.01214	0.00013	3.1	85.6	3.1	77.8	0.82	299	77	77.8	0.82	9.11215
18JR-01	18JR-01_53	270	260.9	0.0763	0.0029	0.01147	0.0002	2.7	74.5	2.7	73.5	1.3	108	73	73.5	1.3	1.34228
18JR-01	18JR-01_56	196	128	0.0817	0.0037	0.01226	0.00018	3.5	79.9	3.5	78.5	1.2	128	88	78.5	1.2	1.75219
18JR-01	18JR-01_57	568	322	4.548	0.046	0.307	0.0031	8.4	1738.8	8.4	1726	15	1756	11	1756	11	1.70843
18JR-01	18JR-01_58	142.1	147.3	0.0809	0.0037	0.01195	0.00019	3.5	78.7	3.5	76.6	1.2	136	86	76.6	1.2	2.66836
18JR-01	18JR-01_59	132.3	73.1	5.413	0.062	0.3518	0.0035	9.5	1886.9	9.5	1942	17	1824	18	1824	18	6.4693
18JR-01	18JR-01_60	399	251	0.0939	0.0024	0.01379	0.00013	2.2	91	2.2	88.27	0.8	148	54	88.27	0.8	3
18JR-01	18JR-01_61	101	45.5	5.217	0.077	0.3373	0.0035	12	1853	12	1873	17	1828	21	1828	21	2.46171
18JR-01	18JR-01_62	480	147.4	4.72	0.11	0.3114	0.0054	19	1767	19	1747	26	1797	27	1797	27	2.78242
18JR-01	18JR-01_63	273	131.1	0.079	0.0031	0.01195	0.00019	2.9	77.1	2.9	76.6	1.2	106	75	76.6	1.2	0.648508
18JR-01	18JR-01_64	761	101.1	4.06	0.047	0.2733	0.0035	9.5	1645.3	9.5	1557	17	1763	13	1763	13	11.6846
18JR-01	18JR-01_65	106.9	79	5.131	0.052	0.3322	0.0026	8.6	1839.9	8.6	1848	13	1827	16	1827	16	1.14943
18JR-01	18JR-01_66	271.5	64.2	5.201	0.046	0.3277	0.0024	7.5	1851.9	7.5	1827	12	1882	11	1882	11	2.92242
18JR-01	18JR-01_67	172.8	55.5	0.0532	0.0025	0.0082	0.00013	2.4	52.6	2.4	52.63	0.84	78	92	52.63	0.84	0.0570342
18JR-01	18JR-01_68	178	169	0.0365	0.003	0.00551	0.00015	3.1	37	3.1	35.39	0.97	90	150	35.39	0.97	4.35135
18JR-01	18JR-01_69	360	190	0.0733	0.0029	0.01151	0.00018	2.8	71.7	2.8	73.8	1.2	47	80	73.8	1.2	2.92887
18JR-01	18JR-01_70	349	408	13.89	0.11	0.5185	0.0052	7.6	2741.6	7.6	2692	22	2773	12	2773	12	2.92102	Core
18JR-01	18JR-01_70	352	206	0.0735	0.0044	0.01111	0.00029	4.1	71.9	4.1	71.2	1.8	110	120	71.2	1.8	0.973574	Rim
18JR-01	18JR-01_71	1135	274	3.649	0.037	0.2512	0.0014	8	1559.3	8	1444.7	7.4	1721	15	1721	15	16.0546
18JR-01	18JR-01_72	157.3	148.3	0.0989	0.004	0.0153	0.0002	3.7	95.5	3.7	97.9	1.3	66	78	97.9	1.3	2.51309
18JR-01	18JR-01_73	495	349	0.0781	0.0022	0.0116	0.00012	2.1	76.3	2.1	74.35	0.78	132	54	74.35	0.78	2.5557
18JR-01	18JR-01_74	652	52.8	4.399	0.071	0.3012	0.0048	13	1711	13	1697	24	1732	16	1732	16	2.02079	Core
18JR-01	18JR-01_75	246	319	0.079	0.0023	0.01199	0.00013	2.2	77.1	2.2	76.83	0.85	102	59	76.83	0.85	0.350195
18JR-01	18JR-01_76	278	129.6	0.0742	0.0025	0.01122	0.00013	2.3	72.6	2.3	71.92	0.8	112	66	71.92	0.8	0.936639
18JR-01	18JR-01_78	242	98.5	0.0734	0.0033	0.01007	0.00015	3.1	71.7	3.1	64.58	0.94	288	85	64.58	0.94	9.93026
18JR-01	18JR-01_79	274	10.4	14.14	0.22	0.5157	0.0071	15	2755	15	2679	30	2817	18	2817	18	4.89883
18JR-01	18JR-01_80	368	199	0.0775	0.0023	0.01173	0.00014	2.2	75.7	2.2	75.2	0.89	107	59	75.2	0.89	0.660502
18JR-01	18JR-01_81	588	522	0.0774	0.0019	0.01203	0.00013	1.8	75.6	1.8	77.1	0.81	59	52	77.1	0.81	1.98413
18JR-01	18JR-01_82	309	135	0.0733	0.003	0.01131	0.00015	2.9	71.7	2.9	72.49	0.94	73	81	72.49	0.94	1.10181
18JR-01	18JR-01_83	552	28.1	4.7	0.039	0.3121	0.0024	7	1766.8	7	1751	12	1789	14	1789	14	2.12409
18JR-01	18JR-01_85	288	93.9	4.35	0.14	0.2939	0.0096	26	1693	26	1655	48	1763	50	1763	50	6.12592
18JR-01	18JR-01_86	322	461	3.063	0.034	0.226	0.0022	8.5	1422.6	8.5	1313	12	1596	17	1596	17	17.7318
18JR-01	18JR-01_87	310	300	0.077	0.0023	0.01167	0.00016	2.2	75.2	2.2	74.8	1	134	67	74.8	1	0.531915
18JR-01	18JR-01_88	277	128.9	0.0878	0.0042	0.01191	0.00018	3.9	85.2	3.9	76.3	1.2	330	100	76.3	1.2	10.446
18JR-01	18JR-01_89	542	71.8	4.475	0.063	0.2952	0.0033	11	1728	11	1667	17	1806	16	1806	16	7.69657
18JR-01	18JR-01_90	78.3	61.4	4.25	0.048	0.2963	0.0026	9.2	1682.5	9.2	1673	13	1693	22	1693	22	1.18133
18JR-01	18JR-01_92	126	89.8	13.25	0.14	0.499	0.0043	9.7	2695.7	9.7	2609	18	2762	11	2762	11	5.53946
18JR-01	18JR-01_93	770	255	0.0751	0.0025	0.01189	0.0002	2.4	73.7	2.4	76.2	1.3	36	65	76.2	1.3	3.39213
18JR-01	18JR-01_94	277	52.6	4.059	0.061	0.2819	0.0039	12	1644	12	1600	20	1702	15	1702	15	5.99295
18JR-01	18JR-01_95	621	342	0.077	0.0019	0.01117	0.00014	1.8	75.2	1.8	71.62	0.88	186	53	71.62	0.88	4.76064
18JR-01	18JR-01_96	461	172.1	0.082	0.0032	0.01135	0.00014	3	79.8	3	72.74	0.88	297	81	72.74	0.88	8.84712
18JR-01	18JR-01_97	303	330.2	0.0811	0.0026	0.01208	0.00012	2.4	79.1	2.4	77.44	0.79	135	65	77.44	0.79	2.09861
18JR-01	18JR-01_98	208	103.8	36.09	0.22	0.7906	0.0046	6.1	3669.1	6.1	3755	17	3621.2	6.7	3621.2	6.7	3.69491
18JR-01	18JR-01_99	179	139	0.1257	0.0086	0.01615	0.00032	7.7	119.7	7.7	103.3	2	400	140	103.3	2	13.7009
18JR-01	18JR-01_100	241.2	76	3.63	0.17	0.255	0.011	37	1550	37	1460	56	1680	30	1680	30	13.0952	Core
18JR-01	18JR-01_100	430	266.9	0.0728	0.003	0.0113	0.00021	2.8	71.3	2.8	72.4	1.4	59	86	72.4	1.4	1.54278	Rim
18JR-01	18JR-01_101	577	141.9	0.532	0.0064	0.06831	0.00051	4.2	432.8	4.2	426	3.1	462	24	426	3.1	1.57116
18JR-01	18JR-01_102	88.1	98.7	0.0809	0.0047	0.01154	0.00023	4.4	78.6	4.4	74	1.4	220	120	74	1.4	5.85242
18JR-01	18JR-01_103	68.2	42.6	1.714	0.032	0.1693	0.0021	12	1011	12	1008	12	1017	35	1017	35	0.884956
18JR-01	18JR-01_104	82.3	37.1	2.425	0.03	0.2105	0.002	8.9	1248.8	8.9	1231	11	1271	29	1271	29	3.14713
18JR-01	18JR-01_105	88.9	77.4	3.882	0.048	0.2779	0.0024	9.9	1608.2	9.9	1580	12	1643	21	1643	21	3.83445
18JR-01	18JR-01_107	588	372	0.0559	0.0025	0.00858	0.00017	2.4	55.1	2.4	55	1.1	79	77	55	1.1	0.181488
18JR-01	18JR-01_108	211.8	148	0.0105	0.0011	0.001611	5e-05	1.1	10.6	1.1	10.38	0.32	60	180	10.38	0.32	2.07547
18JR-01	18JR-01_109	190.8	129.6	4.576	0.039	0.3118	0.0022	7.2	1744.1	7.2	1750	11	1733	16	1733	16	0.980958
18JR-01	18JR-01_110	780	394	0.0837	0.0026	0.01195	0.00014	2.4	81.5	2.4	76.58	0.88	218	64	76.58	0.88	6.03681
18JR-01	18JR-01_111	148.2	152.2	15.49	0.12	0.5547	0.0042	7.2	2845.1	7.2	2846	17	2843	10	2843	10	0.105522
18JR-01	18JR-01_112	138.1	53.6	1.897	0.022	0.1813	0.0013	7.7	1078.9	7.7	1073.9	6.8	1085	21	1085	21	1.02304
18JR-01	18JR-01_113	44.91	37.6	2.291	0.05	0.202	0.0026	15	1207	15	1186	14	1239	40	1239	40	4.27764
18JR-01	18JR-01_114	578	137	0.0568	0.002	0.00857	0.00014	1.9	56.1	1.9	55.03	0.88	105	62	55.03	0.88	1.90731
18JR-01	18JR-01_115	147	110.3	4.338	0.036	0.2992	0.0021	6.9	1699.8	6.9	1687	10	1714	14	1714	14	1.57526
18JR-01	18JR-01_116	212	58.6	0.754	0.017	0.0901	0.0013	10	569	10	556.2	7.9	614	42	556.2	7.9	2.24956
18JR-01	18JR-01_117	251	129.2	25.46	0.15	0.6887	0.0043	5.8	3325.5	5.8	3377	16	3293.9	7.5	3293.9	7.5	2.52285
18JR-01	18JR-01_118	240.9	314.7	3.41	0.026	0.2646	0.0016	6	1507.1	6	1513.1	8	1497	15	1497	15	1.07548
18JR-01	18JR-01_120	647	171	4.532	0.03	0.3044	0.0019	5.4	1736.9	5.4	1712.7	9.4	1762.7	8.5	1762.7	8.5	2.83656
18JR-01	18JR-01_121	454	55	4.767	0.046	0.3158	0.0026	8.2	1778.1	8.2	1769	13	1787	12	1787	12	1.00727
18JR-01	18JR-01_122	321	103.1	4.326	0.047	0.2964	0.0026	9	1697.2	9	1673	13	1728	14	1728	14	3.18287
18JR-01	18JR-01_123	323	161.1	1.721	0.015	0.1709	0.0012	5.6	1015.9	5.6	1017.1	6.4	1011	18	1011	18	0.603363
18JR-01	18JR-01_124	379	210	0.0925	0.0032	0.01381	0.00032	3	89.7	3	88.4	2	161	68	88.4	2	1.44928
18JR-01	18JR-01_125	188.7	181.1	4.065	0.037	0.2906	0.0021	7.4	1646.4	7.4	1644	10	1648	15	1648	15	0.242718
18JR-01	18JR-01_126	430	406	0.0798	0.0026	0.01176	0.00016	2.4	77.9	2.4	75.4	1	158	70	75.4	1	3.20924
18JR-01	18JR-01_127	288	209	0.075	0.003	0.01169	0.00016	2.9	73.6	2.9	74.93	0.99	50	80	74.93	0.99	1.80707
18JR-01	18JR-01_128	129.5	73.3	0.0835	0.0046	0.01199	0.0002	4.2	81.1	4.2	76.8	1.3	190	100	76.8	1.3	5.3021
18JR-01	18JR-01_129	106.9	60.5	2.913	0.034	0.2418	0.0018	8.8	1383.9	8.8	1395.7	9.6	1364	22	1364	22	2.32405
18JR-01	18JR-01_130	599	428	0.0897	0.0019	0.01335	0.00016	1.8	87.1	1.8	85.5	1	133	42	85.5	1	1.83697
18JR-01	18JR-01_131	86.6	79.8	0.0806	0.0048	0.01176	0.00023	4.5	78.3	4.5	75.3	1.5	170	120	75.3	1.5	3.83142
18JR-01	18JR-01_132	155.8	38.9	1.923	0.036	0.1749	0.0032	12	1087	12	1039	17	1195	37	1195	37	13.0544
18JR-01	18JR-01_133	440	189.4	5.663	0.038	0.3373	0.0021	5.7	1925.2	5.7	1873	10	1981.8	9.8	1981.8	9.8	5.48996
18JR-01	18JR-01_134	105	71.7	6.615	0.065	0.3709	0.0029	8.7	2060.1	8.7	2033	13	2092	15	2092	15	2.82027
18JR-01	18JR-01_135	193	64.8	0.1328	0.0068	0.01829	0.00028	6	125.9	6	116.8	1.8	280	97	116.8	1.8	7.22796
18JR-01	18JR-01_136	161	149	0.0771	0.0039	0.01188	0.00022	3.7	75.6	3.7	76.2	1.4	75	97	76.2	1.4	0.793651
18JR-01	18JR-01_137	557	266	4.266	0.028	0.2889	0.0017	5.3	1686.4	5.3	1636.1	8.5	1748.2	8.9	1748.2	8.9	6.41231
18JR-01	18JR-01_138	110.5	21.3	4.446	0.046	0.3053	0.0022	8.6	1719.8	8.6	1717	11	1719	19	1719	19	0.116347
18JR-01	18JR-01_139	1100	365	0.08	0.0037	0.0121	0.00032	3.4	78.1	3.4	77.6	2.1	115	82	77.6	2.1	0.640205	Rim
18JR-01	18JR-01_141	565	585	0.0771	0.0021	0.01161	0.00016	2	75.4	2	74.4	1	125	56	74.4	1	1.32626
18JR-01	18JR-01_142	180	68.3	23.68	0.18	0.635	0.0042	7.4	3254.5	7.4	3169	17	3306.2	8.2	3306.2	8.2	4.14978
18JR-01	18JR-01_143	201	142.8	4.295	0.033	0.2965	0.002	6.4	1691.8	6.4	1673.8	9.9	1714	13	1714	13	2.34539
18JR-01	18JR-01_144	145.8	52.5	5.195	0.057	0.3359	0.0027	9.3	1850.2	9.3	1866	13	1830	15	1830	15	1.96721
18JR-01	18JR-01_145	233	137.4	10.82	0.29	0.44	0.013	24	2499	24	2344	56	2635	14	2635	14	11.0436
18JR-01	18JR-01_146	80.7	24.6	1.883	0.029	0.1765	0.0021	11	1076	11	1047	11	1129	32	1129	32	7.26306
18JR-01	18JR-01_147	243.1	183.1	10.415	0.073	0.4654	0.0035	6.3	2472.8	6.3	2463	16	2477	10	2477	10	0.5652
18JR-01	18JR-01_148	613	543	0.0792	0.002	0.01116	0.00011	1.9	77.4	1.9	71.53	0.71	253	57	71.53	0.71	7.58398
18JR-01	18JR-01_149	209	106	0.088	0.0042	0.01301	0.00028	3.9	85.4	3.9	83.3	1.8	141	83	83.3	1.8	2.45902
18JR-01	18JR-01_150	481	258.9	4.683	0.03	0.3175	0.0017	5.3	1763.7	5.3	1777.1	8.1	1744.7	9	1744.7	9	1.85705
18JR-02	18JR-02_55	947	34.7	14.16	0.27	0.438	0.016	18	2757	18	2346	70	3080	57	3080	57	23.8312
18JR-02	18JR-02_56	786	941	0.0792	0.002	0.01199	0.00014	1.9	77.3	1.9	76.83	0.91	98	51	76.83	0.91	0.608021
18JR-02	18JR-02_57	1002	37.3	7.57	0.11	0.3508	0.0025	13	2178	13	1938	12	2403	28	2403	28	19.3508
18JR-02	18JR-02_58	240	18.1	13.99	0.21	0.49	0.0048	14	2747	14	2570	21	2875	22	2875	22	10.6087
18JR-02	18JR-02_59	1060	783	0.076	0.0019	0.01184	0.00014	1.8	74.3	1.8	75.85	0.87	40	47	75.85	0.87	2.08614
18JR-02	18JR-02_60	304	239.4	0.0718	0.0025	0.01121	0.00015	2.3	70.3	2.3	71.86	0.93	39	66	71.86	0.93	2.21906
18JR-02	18JR-02_61	63.5	76	0.0716	0.0068	0.01073	0.00031	6.4	69.5	6.4	68.8	2	70	170	68.8	2	1.00719
18JR-02	18JR-02_62	209.8	74.6	4.406	0.047	0.304	0.0031	8.9	1712.4	8.9	1710	15	1706	19	1706	19	0.234467
18JR-02	18JR-02_63	1270	830	0.0802	0.0016	0.01217	0.00011	1.5	78.3	1.5	77.97	0.72	90	44	77.97	0.72	0.421456
18JR-02	18JR-02_64	386	241	0.0837	0.0029	0.01177	0.00019	2.7	81.5	2.7	75.4	1.2	252	76	75.4	1.2	7.48466
18JR-02	18JR-02_65	398	159	0.1089	0.0038	0.01522	0.00017	3.5	104.8	3.5	97.4	1.1	266	72	97.4	1.1	7.06107
18JR-02	18JR-02_66	487	346	0.0782	0.0026	0.01201	0.00022	2.5	76.3	2.5	77	1.4	78	68	77	1.4	0.917431
18JR-02	18JR-02_67	319	139.7	10.41	0.094	0.4687	0.0042	8.4	2471	8.4	2477	18	2460	13	2460	13	0.691057
18JR-02	18JR-02_68	331	69.2	4.358	0.033	0.3004	0.0017	6.2	1703.6	6.2	1692.9	8.3	1711	11	1711	11	1.05786
18JR-02	18JR-02_69	325	101.3	4.434	0.042	0.3034	0.0027	7.8	1717.6	7.8	1707	13	1722	17	1722	17	0.87108
18JR-02	18JR-02_70	425	232	0.0796	0.0028	0.01193	0.00014	2.6	77.6	2.6	76.42	0.91	110	69	76.42	0.91	1.52062
18JR-02	18JR-02_71	207.3	202.2	2.089	0.024	0.1929	0.0016	8	1144.2	8	1137	8.5	1144	23	1144	23	0.611888
18JR-02	18JR-02_72	357	262	0.0787	0.0032	0.01207	0.00021	3	76.8	3	77.3	1.3	88	80	77.3	1.3	0.651042
18JR-02	18JR-02_73	299	104.4	0.0549	0.0024	0.00839	0.00011	2.3	54.2	2.3	53.83	0.71	99	89	53.83	0.71	0.682657
18JR-02	18JR-02_74	750	855	0.086	0.0027	0.01283	0.00017	2.5	83.7	2.5	82.2	1.1	116	60	82.2	1.1	1.79211
18JR-02	18JR-02_75	75.2	23	0.1495	0.0098	0.01906	0.00035	8.7	141.1	8.7	121.7	2.2	380	120	121.7	2.2	13.7491
18JR-02	18JR-02_77	498	149	4.617	0.033	0.308	0.0018	5.9	1751.7	5.9	1730.7	8.8	1768	11	1768	11	2.10973
18JR-02	18JR-02_78	879	537	0.0305	0.001	0.004643	5.8e-05	0.99	30.49	0.99	29.86	0.37	90	70	29.86	0.37	2.06625
18JR-02	18JR-02_79	286.5	75.7	12.709	0.096	0.4885	0.0037	7.5	2659.1	7.5	2564	16	2723	10	2723	10	5.83915
18JR-02	18JR-02_80	291	135.9	4.349	0.045	0.2972	0.0027	8.2	1702.9	8.2	1677	13	1725	18	1725	18	2.78261
18JR-02	18JR-02_82	798	594.6	4.45	0.055	0.2799	0.0028	9.8	1722.5	9.8	1591	14	1876	12	1876	12	15.1919
18JR-02	18JR-02_83	167	102.2	16.94	0.29	0.5287	0.0065	16	2929	16	2735	27	3060	20	3060	20	10.6209
18JR-02	18JR-02_84	49.8	35.5	23.93	0.36	0.653	0.0096	15	3262	15	3236	38	3279	21	3279	21	1.31138
18JR-02	18JR-02_85	181.4	133.9	0.0804	0.0036	0.01179	0.00019	3.3	78.4	3.3	75.6	1.2	153	89	75.6	1.2	3.57143
18JR-02	18JR-02_86	370	321	0.0785	0.0027	0.01195	0.00014	2.5	76.6	2.5	76.55	0.86	87	66	76.55	0.86	0.0652742
18JR-02	18JR-02_87	192.9	66.1	4.58	0.04	0.3116	0.0024	7	1745.9	7	1748	12	1734	15	1734	15	0.807382
18JR-02	18JR-02_88	162.2	68.9	10.91	0.14	0.4791	0.005	12	2515	12	2523	22	2505	21	2505	21	0.718563
18JR-02	18JR-02_89	269	131.1	4.363	0.049	0.2997	0.0032	9.2	1704.2	9.2	1689	16	1717	21	1717	21	1.63075
18JR-02	18JR-02_90	29.47	19.04	1.402	0.043	0.1501	0.0025	18	884	18	901	14	839	60	839	14	1.92308
18JR-02	18JR-02_91	165	85.2	2.415	0.034	0.1825	0.0016	10	1246	10	1080.7	8.8	1535	25	1535	25	29.5961
18JR-02	18JR-02_94	305	245	0.0743	0.0033	0.01171	0.00018	3.1	72.6	3.1	75	1.1	32	84	75	1.1	3.30579
18JR-02	18JR-02_95	326	469	0.0825	0.0031	0.01247	0.00016	2.9	80.3	2.9	79.9	1	96	71	79.9	1	0.498132
18JR-02	18JR-02_96	183.2	108.8	4.143	0.039	0.2924	0.0023	7.8	1661.9	7.8	1653	11	1669	17	1669	17	0.958658
18JR-02	18JR-02_97	184	175	13.35	0.13	0.5123	0.0039	9.4	2703.5	9.4	2666	17	2726	12	2726	12	2.20103
18JR-02	18JR-02_98	150.3	47.1	4.657	0.038	0.3125	0.0019	6.9	1758.8	6.9	1752.9	9.5	1764	15	1764	15	0.629252
18JR-02	18JR-02_99	147.9	20	23.93	0.25	0.6553	0.0075	10	3264	10	3247	29	3271	13	3271	13	0.733721
18JR-02	18JR-02_100	702	534	0.0763	0.002	0.01127	0.00015	1.9	74.6	1.9	72.24	0.93	150	51	72.24	0.93	3.16354
18JR-02	18JR-02_101	425	96	2.163	0.018	0.2009	0.0012	5.9	1168.8	5.9	1180.2	6.6	1143	17	1143	17	3.25459
18JR-02	18JR-02_102	168	143	4.639	0.071	0.3095	0.0035	12	1758	12	1738	17	1776	26	1776	26	2.13964
18JR-02	18JR-02_103	112.6	47.72	2.669	0.042	0.2214	0.0025	12	1318	12	1289	13	1360	31	1360	31	5.22059
18JR-02	18JR-02_104	308	284	0.079	0.0033	0.0118	0.00022	3.1	77	3.1	75.6	1.4	107	78	75.6	1.4	1.81818
18JR-02	18JR-02_105	283.6	141.6	4.942	0.04	0.3263	0.0023	6.9	1808.6	6.9	1820	11	1798	13	1798	13	1.22358
18JR-02	18JR-02_106	651	386	0.0907	0.0026	0.01414	0.00016	2.4	88.1	2.4	90.5	1	54	57	90.5	1	2.72418
18JR-02	18JR-02_107	1107	508	0.0519	0.0014	0.00779	0.0001	1.4	51.3	1.4	50.03	0.65	118	53	50.03	0.65	2.47563
18JR-02	18JR-02_109	168	125	23.52	0.17	0.6527	0.0049	7	3248	7	3238	19	3254.8	9.4	3254.8	9.4	0.516161
18JR-02	18JR-02_110	142.6	182	0.0818	0.0044	0.01246	0.00023	4.2	79.5	4.2	79.8	1.5	90	100	79.8	1.5	0.377358
18JR-02	18JR-02_111	195.4	198.7	29.69	0.5	0.688	0.01	17	3472	17	3371	40	3537	21	3537	21	4.69324
18JR-02	18JR-02_112	216	109	0.0934	0.0057	0.01221	0.00022	5.2	90.2	5.2	78.2	1.4	340	120	78.2	1.4	13.3038
18JR-02	18JR-02_115	143.1	42.7	4.45	0.086	0.2985	0.0041	16	1720	16	1684	20	1753	32	1753	32	3.93611
18JR-02	18JR-02_116	924	382	4.623	0.053	0.3139	0.0036	9.7	1752.2	9.7	1759	18	1742	16	1742	16	0.97589
18JR-02	18JR-02_117	266	85.4	4.364	0.041	0.2965	0.0027	7.9	1704.4	7.9	1674	13	1744	15	1744	15	4.01376
18JR-02	18JR-02_118	122.6	40.4	2.199	0.052	0.1923	0.0031	16	1176	16	1133	17	1247	43	1247	43	9.14194
18JR-02	18JR-02_119	249	74.2	4.752	0.046	0.3165	0.0026	8	1775.6	8	1772	13	1781	16	1781	16	0.505334
18JR-02	18JR-02_121	921	325	0.0912	0.0045	0.01378	0.0004	4.2	88.6	4.2	88.2	2.5	108	91	88.2	2.5	0.451467	Rim
18JR-02	18JR-02_122	188.7	55.2	4.709	0.039	0.3112	0.0022	7	1768.9	7	1746	11	1796	14	1796	14	2.78396
18JR-02	18JR-02_123	224.1	124.3	6.027	0.048	0.3568	0.0027	7	1978.8	7	1967	13	1995	13	1995	13	1.40351
18JR-02	18JR-02_125	277	94.6	0.0768	0.0029	0.0113	0.00016	2.7	75	2.7	72.5	1	161	78	72.5	1	3.33333
18JR-02	18JR-02_126	262.1	83	2.422	0.023	0.2143	0.0014	6.8	1248.4	6.8	1251.4	7.4	1250	18	1250	18	0.112
18JR-02	18JR-02_127	438	227	0.0764	0.0023	0.01182	0.00014	2.2	74.7	2.2	75.73	0.91	76	60	75.73	0.91	1.37885
18JR-02	18JR-02_128	518	230.1	0.0906	0.0032	0.01429	0.00019	2.9	87.9	2.9	91.5	1.2	29	65	91.5	1.2	4.09556
18JR-02	18JR-02_129	201	67.6	4.713	0.039	0.3187	0.002	7	1768.9	7	1783.1	9.9	1763	15	1763	15	1.1401
18JR-02	18JR-02_130	721	194	4.342	0.066	0.277	0.0044	12	1700	12	1576	22	1867	24	1867	24	15.5865
18JR-02	18JR-02_131	409.8	275	4.196	0.057	0.2737	0.0035	11	1672	11	1559	18	1827	17	1827	17	14.6689
18JR-02	18JR-02_133	554	284	4.419	0.046	0.303	0.003	8.7	1714.4	8.7	1705	15	1735	17	1735	17	1.72911
18JR-02	18JR-02_134	763	1371	0.0762	0.0016	0.01179	0.00012	1.5	74.6	1.5	75.54	0.76	81	47	75.54	0.76	1.26005
18JR-02	18JR-02_135	1100	1175	0.0478	0.0012	0.007209	6.7e-05	1.2	47.4	1.2	46.3	0.43	113	52	46.3	0.43	2.32068
18JR-02	18JR-02_136	294	170	0.0758	0.0036	0.01162	0.00021	3.4	73.9	3.4	74.5	1.3	113	89	74.5	1.3	0.811908
18JR-02	18JR-02_137	298	143.6	0.0896	0.0048	0.012	0.0002	4.5	86.8	4.5	76.9	1.2	370	110	76.9	1.2	11.4055
18JR-02	18JR-02_138	486	164.7	1.792	0.029	0.1683	0.0026	11	1043	11	1002	15	1134	20	1134	20	11.6402
18JR-02	18JR-02_139	311.3	141.7	11.88	0.13	0.4514	0.0051	10	2594	10	2401	22	2760	14	2760	14	13.0072
18JR-02	18JR-02_144	122.7	74.2	23.45	0.48	0.63	0.011	19	3250	19	3146	43	3317	13	3317	13	5.15526
18JR-02	18JR-02_145	905	14.5	4.408	0.066	0.2779	0.0032	12	1712	12	1580	16	1893	21	1893	21	16.5346
18JR-02	18JR-02_146	800	222	0.0745	0.0037	0.01173	0.00019	3.5	72.9	3.5	75.2	1.2	52	93	75.2	1.2	3.15501
18JR-02	18JR-02_147	80.9	69.2	0.1233	0.0083	0.01566	0.00045	7.5	117.5	7.5	100.1	2.8	450	140	100.1	2.8	14.8085
18JR-02	18JR-02_148	240	153	0.0788	0.0046	0.01195	0.00021	4.3	76.7	4.3	76.6	1.4	130	120	76.6	1.4	0.130378
18JR-02	18JR-02_149	46.3	23	2.002	0.045	0.1885	0.0023	15	1113	15	1113	12	1119	49	1119	49	0.536193
18JR-02	18JR-02_150	70	39.5	24.27	0.24	0.6623	0.006	9.8	3277.7	9.8	3275	23	3292.2	9.9	3292.2	9.9	0.522447
18JR-02	18JR-02_156	171.6	145.6	0.079	0.0039	0.0118	0.00018	3.8	77.4	3.8	75.6	1.1	126	96	75.6	1.1	2.32558
18JR-02	18JR-02_157	118.1	75.8	4.132	0.046	0.2888	0.0029	9.1	1659.6	9.1	1635	14	1680	21	1680	21	2.67857
18JR-02	18JR-02_158	258	162.6	5.058	0.038	0.3262	0.0018	6.5	1828.4	6.5	1819.9	8.7	1832	12	1832	12	0.66048
18JR-02	18JR-02_159	121.5	72	3.518	0.059	0.2635	0.0043	13	1528	13	1506	22	1561	26	1561	26	3.52338
18JR-02	18JR-02_160	485	78.3	4.657	0.024	0.3128	0.0015	4.3	1759.2	4.3	1754.3	7.3	1758.7	9.9	1758.7	9.9	0.250185
18JR-02	18JR-02_161	482	297	10.709	0.081	0.477	0.0035	7.1	2497.3	7.1	2514	15	2479.5	9.4	2479.5	9.4	1.39141
18JR-02	18JR-02_162	367	87.5	8.59	0.45	0.415	0.016	53	2259	53	2225	76	2323	40	2323	40	4.21868
18JR-02	18JR-02_163	549	172.7	3.218	0.076	0.2156	0.0038	18	1457	18	1258	20	1755	27	1755	27	28.3191
18JR-02	18JR-02_164	1210	520	0.0785	0.002	0.01176	0.00014	1.9	76.7	1.9	75.34	0.89	112	53	75.34	0.89	1.77314
18JR-02	18JR-02_165	101.2	167	10.97	0.17	0.464	0.0072	14	2517	14	2455	32	2566	18	2566	18	4.3258
18JR-02	18JR-02_166	432	260	0.0776	0.0041	0.01179	0.00018	3.8	75.7	3.8	75.5	1.2	110	110	75.5	1.2	0.264201
18JR-02	18JR-02_167	275.3	47.1	4.907	0.044	0.3228	0.0027	7.5	1802.5	7.5	1803	13	1797	14	1797	14	0.33389
18JR-02	18JR-02_168	170.7	79.2	24.21	0.51	0.648	0.015	21	3272	21	3219	59	3301	28	3301	28	2.4841
18JR-02	18JR-02_169	1020	383	0.0854	0.0059	0.01249	0.0005	5.4	83	5.4	80	3.2	151	87	80	3.2	3.61446
18JR-02	18JR-02_170	420	242.6	10.297	0.084	0.4589	0.0038	7.6	2460.9	7.6	2434	17	2477.1	8.9	2477.1	8.9	1.73994
18JR-02	18JR-02_172	101.1	96.5	5.26	0.12	0.3323	0.0082	20	1856	20	1846	40	1863	38	1863	38	0.912507
18JR-02	18JR-02_173	303	219	5.07	0.11	0.3205	0.0065	19	1830	19	1791	32	1860	22	1860	22	3.70968
18JR-02	18JR-02_174	500	263	0.0804	0.0038	0.01144	0.0002	3.6	78.4	3.6	73.3	1.3	219	95	73.3	1.3	6.5051
18JR-02	18JR-02_175	1593	378	4.838	0.044	0.319	0.003	7.7	1791.3	7.7	1785	15	1783	13	1783	13	0.11217
18JR-02	18JR-02_176	272.4	159.1	4.265	0.032	0.3009	0.0021	6.3	1686	6.3	1696	10	1664	15	1664	15	1.92308
18JR-02	18JR-02_177	225.4	154.6	2.38	0.022	0.2091	0.0013	6.7	1235.9	6.7	1223.6	7.2	1255	18	1255	18	2.50199
18JR-02	18JR-02_178	199	141.4	0.725	0.014	0.08878	0.00096	7.9	553.5	7.9	548.2	5.7	552	39	548.2	5.7	0.957543
18JR-02	18JR-02_179	46.3	49.3	14.92	0.23	0.5443	0.0073	15	2807	15	2799	30	2806	20	2806	20	0.249465
18JR-02	18JR-02_180	616.6	276.2	3.994	0.054	0.28	0.0038	11	1635	11	1591	19	1685	22	1685	22	5.57864
18JR-02	18JR-02_181	390	468	0.0828	0.0032	0.01173	0.00014	3	80.6	3	75.2	0.9	214	79	75.2	0.9	6.69975
18JR-02	18JR-02_182	205	88.1	20.66	0.57	0.587	0.016	28	3113	28	2970	65	3207	31	3207	31	7.39008
18JR-02	18JR-02_183	313.1	150.6	4.26	0.043	0.2911	0.0024	8.3	1684.5	8.3	1646	12	1725	16	1725	16	4.57971
18JR-02	18JR-02_184	69.2	45.9	10.94	0.13	0.391	0.0042	10	2518	10	2127	19	2842	16	2842	16	25.1583
18JR-02	18JR-02_185	669	31.3	10.64	0.11	0.4622	0.0044	9.7	2490.9	9.7	2448	20	2516	12	2516	12	2.7027
18JR-02	18JR-02_186	129	77.8	13.95	0.12	0.5337	0.0045	8.4	2744.8	8.4	2756	19	2730	14	2730	14	0.952381
18JR-02	18JR-02_187	316	61.9	3.087	0.036	0.243	0.0022	8.8	1428.5	8.8	1402	12	1461	16	1461	16	4.03833
18JR-02	18JR-02_188	322.7	125.8	4.43	0.065	0.2882	0.0042	12	1716	12	1632	21	1827	21	1827	21	10.6732
18JR-02	18JR-02_190	970	602	0.077	0.0024	0.01148	0.00016	2.3	75.3	2.3	73.6	1	125	61	73.6	1	2.25764
18JR-02	18JR-02_191	275	287	0.0762	0.0034	0.0116	0.00018	3.2	74.4	3.2	74.3	1.1	100	88	74.3	1.1	0.134409
18JR-02	18JR-02_192	168.8	168.9	5.113	0.046	0.3219	0.0027	7.6	1837.4	7.6	1799	13	1876	16	1876	16	4.10448
18JR-02	18JR-02_193	207.5	226	0.765	0.019	0.08608	0.00097	11	576	11	532.3	5.8	735	45	532.3	5.8	7.58681
18JR-02	18JR-02_194	517	101.8	4.349	0.037	0.2963	0.0025	7	1702.1	7	1673	12	1724	15	1724	15	2.95824
18JR-02	18JR-02_195	385	315	0.0805	0.0027	0.01196	0.00016	2.6	78.8	2.6	76.7	1	138	68	76.7	1	2.66497
18JR-02	18JR-02_196	162	63	9.618	0.079	0.4358	0.0031	7.5	2398	7.5	2332	14	2443	13	2443	13	4.54359
18JR-02	18JR-02_197	168.5	87.4	4.871	0.046	0.3045	0.0025	8	1796.2	8	1713	12	1886	16	1886	16	9.17285
18JR-02	18JR-02_198	180	109.4	0.0917	0.0061	0.0118	0.00047	5.6	88.7	5.6	75.6	3	390	120	75.6	3	14.7689
18JR-02	18JR-02_199	120.2	64.1	1.023	0.019	0.1163	0.0011	9.4	714	9.4	709	6.5	714	38	709	6.5	0.70028
18JR-02	18JR-02_200	667	117	4.37	0.16	0.2853	0.0093	30	1701	30	1616	47	1809	36	1809	36	10.6689
18JR-02	18JR-02_202	533	229.4	0.1069	0.0038	0.01551	0.00037	3.5	102.9	3.5	99.2	2.4	181	67	99.2	2.4	3.59572
18JR-02	18JR-02_204	256.6	106.3	0.0693	0.0027	0.01099	0.00016	2.5	68	2.5	70.4	1	6	68	70.4	1	3.52941
18JR-02	18JR-02_205	221	197.1	0.0772	0.0035	0.01195	0.00016	3.3	75.3	3.3	76.6	1	47	83	76.6	1	1.72643
18JR-02	18JR-02_206	281	152.9	3.822	0.054	0.2717	0.0035	11	1596	11	1549	18	1653	19	1653	19	6.29159
18JR-02	18JR-02_207	152.4	118.1	0.071	0.013	0.00262	0.00013	12	71	12	16.89	0.87	2200	320	16.89	0.87	76.2113
18JR-02	18JR-02_208	159.2	313.2	1.768	0.022	0.1737	0.0016	8	1033	8	1032.6	8.8	1019	27	1019	27	1.33464
18MaR-01	18MaR-01_1	257	161.2	0.0762	0.0033	0.01158	0.00023	3.1	74.4	3.1	74.2	1.5	110	81	74.2	1.5	0.268817
18MaR-01	18MaR-01_2	539	1090	19.21	0.38	0.531	0.013	20	3047	20	2750	52	3267	37	3267	37	15.8249
18MaR-01	18MaR-01_4	335	259	0.0881	0.0033	0.01187	0.00016	3.1	85.6	3.1	76	1	320	76	76	1	11.215
18MaR-01	18MaR-01_5	253.4	151.6	0.3201	0.0059	0.04446	0.00039	4.5	281.6	4.5	280.4	2.4	285	43	280.4	2.4	0.426136
18MaR-01	18MaR-01_6	503	249	0.0482	0.0016	0.007368	7.2e-05	1.5	47.7	1.5	47.32	0.46	93	67	47.32	0.46	0.796646
18MaR-01	18MaR-01_7	75.8	39	2.67	0.041	0.2252	0.0018	11	1318	11	1309	9.6	1332	28	1332	28	1.72673
18MaR-01	18MaR-01_8	106.2	51	1.904	0.024	0.1796	0.0019	8.5	1081.4	8.5	1064	10	1121	24	1121	24	5.08475
18MaR-01	18MaR-01_9	411.4	420	4.436	0.029	0.3049	0.0014	5.5	1718.6	5.5	1715.5	7	1722	10	1722	10	0.377468
18MaR-01	18MaR-01_10	178.3	81.5	2.891	0.054	0.2375	0.0031	14	1379	14	1373	16	1386	34	1386	34	0.937951	Core
18MaR-01	18MaR-01_10	515.2	12.3	0.515	0.012	0.0685	0.001	8.1	421.6	8.1	427.3	6.3	395	46	427.3	6.3	1.35199	Rim
18MaR-01	18MaR-01_11	701	422	0.0711	0.0017	0.010695	9.9e-05	1.6	69.7	1.6	68.58	0.63	122	42	68.58	0.63	1.60689
18MaR-01	18MaR-01_12	889	559	0.0909	0.0019	0.013463	9.3e-05	1.8	88.3	1.8	86.21	0.59	149	43	86.21	0.59	2.36693
18MaR-01	18MaR-01_13	286	369	9.91	0.15	0.4388	0.0062	14	2423	14	2344	28	2493.5	9.4	2493.5	9.4	5.99559
18MaR-01	18MaR-01_15	212	158	14.14	0.15	0.5308	0.006	10	2758	10	2743	25	2769.5	8	2769.5	8	0.956851
18MaR-01	18MaR-01_16	228.3	141.2	15.01	0.097	0.5309	0.0037	6.2	2815.2	6.2	2745	15	2864.2	8.5	2864.2	8.5	4.16172
18MaR-01	18MaR-01_17	770	930	9.38	0.17	0.418	0.0075	17	2372	17	2249	35	2483.8	6.2	2483.8	6.2	9.45326
18MaR-01	18MaR-01_18	337	210	2.65	0.062	0.2181	0.0047	17	1315	17	1270	25	1381	16	1381	16	8.03765
18MaR-01	18MaR-01_19	306.2	238.6	3.458	0.048	0.2442	0.003	11	1517	11	1408	16	1672	15	1672	15	15.7895	Core
18MaR-01	18MaR-01_19	288	47.9	0.0506	0.0041	0.00755	0.00016	3.9	50.1	3.9	48.5	1	140	170	48.5	1	3.19361	Rim
18MaR-01	18MaR-01_20	462	91.5	4.829	0.031	0.3198	0.002	5.4	1789.4	5.4	1789	10	1792.4	9.2	1792.4	9.2	0.18969
18MaR-01	18MaR-01_23	57.3	56.3	3.771	0.053	0.2756	0.0022	11	1585	11	1569	11	1611	23	1611	23	2.60708
18MaR-01	18MaR-01_24	899	587	0.0956	0.0017	0.01409	0.00012	1.5	92.7	1.5	90.2	0.74	162	41	90.2	0.74	2.69687
18MaR-01	18MaR-01_25	574	284.7	2.363	0.031	0.2053	0.0017	9.3	1230.5	9.3	1203.7	9.3	1297	22	1297	22	7.19352
18MaR-01	18MaR-01_26	132.6	102.7	13.84	0.12	0.5139	0.0039	8	2737.9	8	2673	17	2784.3	9.4	2784.3	9.4	3.99741
18MaR-01	18MaR-01_27	175.2	161.2	11.77	0.14	0.4745	0.0034	11	2585	11	2503	15	2650	14	2650	14	5.54717
18MaR-01	18MaR-01_28	249.3	109.9	3.181	0.021	0.2515	0.0013	5.3	1452.9	5.3	1445.9	6.6	1462	13	1462	13	1.10123
18MaR-01	18MaR-01_29	72.9	75.1	6.659	0.07	0.3806	0.004	9.5	2067	9.5	2078	19	2053	18	2053	18	1.21773
18MaR-01	18MaR-01_30	225	130.9	0.0765	0.003	0.01147	0.00014	2.9	74.7	2.9	73.51	0.92	123	77	73.51	0.92	1.59304
18MaR-01	18MaR-01_31	160.6	76.9	2.148	0.054	0.1829	0.0044	18	1164	18	1081	24	1321	22	1321	22	18.1681
18MaR-01	18MaR-01_32	781	430	0.7642	0.0071	0.09181	0.00073	4.1	576.1	4.1	566.2	4.3	614	18	566.2	4.3	1.71845
18MaR-01	18MaR-01_33	436	99	17.27	0.5	0.519	0.012	28	2945	28	2691	52	3127	24	3127	24	13.9431	Core
18MaR-01	18MaR-01_34	316	233	0.0772	0.0031	0.01127	0.00016	3	75.3	3	72.2	1	167	78	72.2	1	4.11687
18MaR-01	18MaR-01_35	437.8	234.9	12.7	0.14	0.4736	0.0048	11	2656	11	2499	21	2779	10	2779	10	10.0756
18MaR-01	18MaR-01_36	1090	346	0.0763	0.0021	0.01148	0.00012	2	74.6	2	73.59	0.75	114	60	73.59	0.75	1.35389
18MaR-01	18MaR-01_37	351	289	1.685	0.018	0.1692	0.0013	6.9	1002.4	6.9	1007.3	7.3	995	20	995	20	1.23618
18MaR-01	18MaR-01_38	991	536	0.0734	0.0015	0.011074	9.8e-05	1.4	71.9	1.4	70.99	0.63	109	40	70.99	0.63	1.26565
18MaR-01	18MaR-01_39	1310	464	0.0767	0.0013	0.01139	0.00011	1.2	75.1	1.2	73	0.69	148	36	73	0.69	2.79627
18MaR-01	18MaR-01_40	337	274	0.0794	0.0028	0.01143	0.00014	2.7	77.4	2.7	73.24	0.88	200	70	73.24	0.88	5.37468
18MaR-01	18MaR-01_41	214.6	215	4.036	0.027	0.2852	0.0018	5.4	1641	5.4	1617.6	8.9	1669	14	1669	14	3.07969
18MaR-01	18MaR-01_42	245	89	4.812	0.049	0.3209	0.0032	8.8	1787	8.8	1794	15	1784	12	1784	12	0.560538
18MaR-01	18MaR-01_43	142.8	84.5	4.306	0.046	0.2979	0.0023	8.8	1693.6	8.8	1680	11	1708	16	1708	16	1.63934
18MaR-01	18MaR-01_44	129.4	51.9	10.13	0.11	0.464	0.0038	11	2447	11	2457	17	2440	13	2440	13	0.696721
18MaR-01	18MaR-01_45	284	189.8	8.86	0.22	0.3456	0.0089	23	2321	23	1912	43	2704	11	2704	11	29.2899
18MaR-01	18MaR-01_46	148.9	107.9	13.9	0.1	0.5204	0.0035	6.9	2742.3	6.9	2700	15	2771.6	8.6	2771.6	8.6	2.58335
18MaR-01	18MaR-01_47	363	152	4.335	0.028	0.2946	0.0019	5.4	1699.4	5.4	1664.3	9.6	1741	10	1741	10	4.40551
18MaR-01	18MaR-01_48	297.3	611	13.323	0.087	0.4963	0.0034	6.2	2702.2	6.2	2597	15	2780.1	8.6	2780.1	8.6	6.58609
18MaR-01	18MaR-01_49	357	241	0.1697	0.0041	0.02467	0.00026	3.6	159	3.6	157.1	1.7	183	50	157.1	1.7	1.19497
18MaR-01	18MaR-01_51	536	343	9.51	0.27	0.3566	0.0098	27	2377	27	1960	47	2767	13	2767	13	29.1652
18MaR-01	18MaR-01_52	223.4	93.2	5.661	0.04	0.3301	0.0025	6.1	1924.8	6.1	1838	12	2011	12	2011	12	8.60269
18MaR-01	18MaR-01_54	550	363	5.649	0.073	0.347	0.0036	11	1922	11	1920	17	1921	13	1921	13	0.0520562
18MaR-01	18MaR-01_55	374	135.8	4.822	0.032	0.3189	0.0019	5.6	1788.3	5.6	1784.3	9.2	1788	11	1788	11	0.206935
18MaR-01	18MaR-01_56	234.8	180.3	0.1001	0.0046	0.01466	0.00016	4.1	96.5	4.1	93.8	1	127	69	93.8	1	2.79793
18MaR-01	18MaR-01_57	101.2	79.4	1.955	0.029	0.184	0.0019	10	1099	10	1088	11	1110	27	1110	27	1.98198
18MaR-01	18MaR-01_58	285.2	153.1	0.4976	0.0084	0.06552	0.00062	5.4	410.5	5.4	409.1	3.8	404	33	409.1	3.8	0.341048
18MaR-01	18MaR-01_59	84.6	92.3	0.0667	0.0066	0.0096	0.00022	5.9	65	5.9	61.6	1.4	130	130	61.6	1.4	5.23077
18MaR-01	18MaR-01_60	171.1	89.2	14.33	0.27	0.5335	0.0093	18	2769	18	2752	39	2774	13	2774	13	0.793079
18MaR-01	18MaR-01_61	192.8	89.8	0.906	0.013	0.1081	0.0011	7.2	655.3	7.2	661.8	6.5	618	33	661.8	6.5	0.991912
18MaR-01	18MaR-01_62	306	165.1	0.0804	0.0026	0.01163	0.00015	2.4	78.4	2.4	74.51	0.97	179	64	74.51	0.97	4.96173
18MaR-01	18MaR-01_63	33.7	42.2	3.62	0.16	0.29	0.012	36	1545	36	1638	62	1408	47	1408	47	16.3352	Core
18MaR-01	18MaR-01_63	350	209	0.0855	0.0061	0.01246	0.0003	5.7	83.1	5.7	79.8	1.9	160	130	79.8	1.9	3.97112	Rim
18MaR-01	18MaR-01_64	730.3	431	0.0829	0.0029	0.01108	0.00017	2.7	80.7	2.7	71	1.1	346	61	71	1.1	12.0198	Rim
18MaR-01	18MaR-01_65	107.7	67	13.49	0.11	0.5142	0.0037	7.9	2714.7	7.9	2674	16	2732	10	2732	10	2.12299
18MaR-01	18MaR-01_66	195	224	13.43	0.13	0.5006	0.0045	9.1	2710.4	9.1	2615	19	2770	10	2770	10	5.59567
18MaR-01	18MaR-01_67	521	235.7	4.12	0.046	0.2757	0.0035	9.2	1657	9.2	1569	18	1764	11	1764	11	11.0544
18MaR-01	18MaR-01_70	337	273.2	0.0807	0.003	0.01155	0.00023	2.8	78.7	2.8	74	1.5	219	78	74	1.5	5.97205
18MaR-01	18MaR-01_71	27.7	18.1	1.625	0.049	0.1648	0.0031	19	975	19	983	17	936	57	936	57	5.02137
18MaR-01	18MaR-01_72	179	50.5	15.34	0.96	0.464	0.02	62	2796	62	2445	88	3070	34	3070	34	20.3583	Core
18MaR-01	18MaR-01_73	326	130.9	0.053	0.0022	0.00755	0.00011	2.1	52.4	2.1	48.5	0.73	205	80	48.5	0.73	7.44275
18MaR-01	18MaR-01_74	248.9	95.8	1.922	0.023	0.1792	0.0015	7.9	1088	7.9	1062.6	8	1125	19	1125	19	5.54667
18MaR-01	18MaR-01_75	133.3	103.2	12.958	0.081	0.5059	0.0033	5.9	2676	5.9	2639	14	2697.7	7.7	2697.7	7.7	2.17593
18MaR-01	18MaR-01_76	492	276.5	0.1045	0.0028	0.01514	0.00017	2.5	100.8	2.5	96.8	1.1	179	55	96.8	1.1	3.96825
18MaR-01	18MaR-01_77	36.7	2.84	10.25	0.22	0.4535	0.0091	20	2453	20	2408	40	2485	33	2485	33	3.09859
18MaR-01	18MaR-01_79	292	205	0.0303	0.0017	0.004623	8.6e-05	1.7	30.2	1.7	29.73	0.55	90	110	29.73	0.55	1.55629
18MaR-01	18MaR-01_80	69.9	56	26.16	0.26	0.7027	0.0069	9.9	3351.1	9.9	3429	26	3302	10	3302	10	3.84615
18MaR-01	18MaR-01_81	406	346	18.88	0.24	0.5703	0.0073	12	3034	12	2913	29	3108	14	3108	14	6.27413
18MaR-01	18MaR-01_82	131.4	100.9	14	0.12	0.5225	0.0048	7.8	2748.6	7.8	2709	20	2773	10	2773	10	2.30797
18MaR-01	18MaR-01_83	32.1	28.9	2.774	0.053	0.2231	0.0027	14	1345	14	1298	14	1412	35	1412	35	8.07365
18MaR-01	18MaR-01_84	367.4	255.3	0.0762	0.0025	0.01099	0.00015	2.3	74.5	2.3	70.48	0.97	185	70	70.48	0.97	5.39597
18MaR-01	18MaR-01_85	141.2	102.4	0.0973	0.0044	0.01334	0.00023	4.1	94.1	4.1	85.4	1.5	290	94	85.4	1.5	9.24548
18MaR-01	18MaR-01_86	99.6	83.1	22.78	0.21	0.6147	0.0057	8.9	3216.2	8.9	3087	23	3294	12	3294	12	6.28415
18MaR-01	18MaR-01_87	351	181	0.1118	0.0036	0.01564	0.0002	3.3	107.4	3.3	100	1.2	273	69	100	1.2	6.89013
18MaR-01	18MaR-01_88	529	353	0.0959	0.0025	0.01469	0.00017	2.3	92.9	2.3	94	1.1	77	50	94	1.1	1.18407
18MaR-01	18MaR-01_89	504	358	0.0894	0.0021	0.01391	0.00017	1.9	86.9	1.9	89.1	1.1	59	47	89.1	1.1	2.53165
18MaR-01	18MaR-01_90	231.3	151.8	0.0753	0.0041	0.0111	0.00027	3.9	73.5	3.9	71.2	1.7	150	100	71.2	1.7	3.12925	Rim
18MaR-01	18MaR-01_91	590	80.1	4.061	0.051	0.2678	0.0034	10	1646	10	1529	17	1795	12	1795	12	14.8189	Core
18MaR-01	18MaR-01_91	139.2	126.5	0.0757	0.0061	0.01152	0.00032	5.7	73.9	5.7	73.8	2	70	160	73.8	2	0.135318	Rim
18MaR-01	18MaR-01_92	78	40.5	3.743	0.087	0.2576	0.0047	19	1575	19	1476	24	1709	29	1709	29	13.6337
18MaR-01	18MaR-01_93	198.9	131.6	25.74	0.28	0.6713	0.0064	11	3336	11	3310	25	3348	11	3348	11	1.13501
18MaR-01	18MaR-01_94	485	38.1	6.99	0.22	0.369	0.0065	28	2104	28	2029	29	2183	29	2183	29	7.05451
18MaR-01	18MaR-01_95	218	37.7	5.73	0.24	0.364	0.014	38	1917	38	1991	67	1857	17	1857	17	7.21594
18MaR-01	18MaR-01_96	323.1	97.9	10.802	0.077	0.4721	0.0032	6.7	2505.6	6.7	2492	14	2519	9.6	2519	9.6	1.07185
18MaR-01	18MaR-01_97	472	323	0.0915	0.002	0.01386	0.00014	1.8	88.8	1.8	88.72	0.88	93	45	88.72	0.88	0.0900901
18MaR-01	18MaR-01_98	710	378	3.951	0.075	0.2706	0.0049	16	1624	16	1542	25	1727	12	1727	12	10.7122
18MaR-01	18MaR-01_99	335.2	174.7	0.0549	0.002	0.007739	9.3e-05	1.9	54.2	1.9	49.7	0.6	237	76	49.7	0.6	8.30258
18MaR-01	18MaR-01_100	1940	1074	0.0785	0.0013	0.01186	0.00011	1.2	76.8	1.2	75.98	0.72	103	30	75.98	0.72	1.06771
18MaR-01	18MaR-01_101	385	148	0.0721	0.0026	0.01057	0.00019	2.4	70.6	2.4	67.8	1.2	173	77	67.8	1.2	3.96601
18MaR-01	18MaR-01_102	808	635	0.094	0.0017	0.01395	0.00012	1.6	91.2	1.6	89.28	0.79	139	40	89.28	0.79	2.10526
18MaR-01	18MaR-01_103	18.76	33.9	1.979	0.056	0.1891	0.0032	19	1105	19	1116	17	1067	54	1067	54	4.59231
18MaR-01	18MaR-01_104	218	179.5	4.109	0.045	0.2722	0.0026	8.9	1654.8	8.9	1552	13	1785	17	1785	17	13.0532
18MaR-01	18MaR-01_105	77.7	107.7	1.754	0.039	0.1663	0.0028	14	1027	14	991	16	1101	36	1101	36	9.99092
18MaR-01	18MaR-01_107	833	643	0.0768	0.0017	0.01159	0.00012	1.6	75.1	1.6	74.31	0.73	116	46	74.31	0.73	1.05193
18MaR-01	18MaR-01_108	436	270	19.92	0.4	0.5635	0.0096	21	3082	21	2878	40	3211	16	3211	16	10.3706
18MaR-01	18MaR-01_109	155.5	116.5	13.132	0.086	0.5134	0.0031	6.2	2688.5	6.2	2671	13	2702.2	8.7	2702.2	8.7	1.15461
18MaR-01	18MaR-01_110	24.3	23	7.53	0.15	0.4005	0.0065	17	2172	17	2169	30	2172	24	2172	24	0.138122
18MaR-01	18MaR-01_111	79.7	49.4	11.55	0.14	0.4826	0.0059	12	2566	12	2536	26	2588	16	2588	16	2.00927
18MaR-01	18MaR-01_112	135.6	69.8	11.823	0.08	0.4967	0.003	6.4	2589.7	6.4	2599	13	2580.9	8.6	2580.9	8.6	0.701306
18MaR-01	18MaR-01_113	484	319	0.0947	0.0023	0.01423	0.00012	2.2	91.8	2.2	91.07	0.74	126	49	91.07	0.74	0.795207
18MaR-01	18MaR-01_114	45.2	21.5	5.032	0.066	0.3237	0.0031	11	1822	11	1807	15	1840	21	1840	21	1.79348
18MaR-01	18MaR-01_115	591	370	0.0763	0.002	0.01146	0.00014	1.9	74.6	1.9	73.44	0.88	116	53	73.44	0.88	1.55496
18MaR-01	18MaR-01_116	497	535	14.73	0.11	0.5426	0.0048	7.2	2797	7.2	2794	20	2801	13	2801	13	0.249911
18MaR-01	18MaR-01_117	332.8	384.7	11.963	0.098	0.4799	0.0038	7.4	2601.9	7.4	2526	16	2660.4	8.5	2660.4	8.5	5.05187
18MaR-01	18MaR-01_118	361	284	0.0948	0.0026	0.01401	0.0002	2.4	91.9	2.4	89.7	1.3	161	58	89.7	1.3	2.39391
18MaR-01	18MaR-01_119	645	501.6	0.1024	0.0023	0.01526	0.00016	2.1	98.9	2.1	97.64	0.99	133	43	97.64	0.99	1.27401
18MaR-01	18MaR-01_120	120.2	258.9	1.754	0.024	0.1716	0.0017	8.9	1027.4	8.9	1020.9	9.2	1034	30	1034	30	1.26692
18MaR-01	18MaR-01_121	111.5	61.4	22.17	0.17	0.6497	0.0045	7.4	3190.2	7.4	3226	18	3167.1	8.9	3167.1	8.9	1.85975
18MaR-01	18MaR-01_122	260.5	95.5	1.849	0.019	0.1792	0.0014	7	1062.2	7	1062.4	7.4	1055	19	1055	19	0.701422
18MaR-01	18MaR-01_123	80.6	73.9	24.42	0.38	0.669	0.0097	15	3282	15	3299	37	3276	19	3276	19	0.702076
18MaR-01	18MaR-01_124	605	412	0.0954	0.0023	0.01422	0.00013	2.1	92.4	2.1	91	0.85	139	49	91	0.85	1.51515
18MaR-01	18MaR-01_125	150.5	95.9	1.789	0.023	0.1731	0.0017	8.3	1040.2	8.3	1028.8	9.3	1069	23	1069	23	3.76052
18MaR-01	18MaR-01_126	657	28.67	1.761	0.015	0.1723	0.0012	5.6	1030.7	5.6	1024.6	6.4	1044	14	1044	14	1.85824
18MaR-01	18MaR-01_127	176.7	118.4	0.765	0.011	0.09038	0.00071	6.6	576.1	6.6	557.8	4.2	643	29	557.8	4.2	3.17653
18MaR-01	18MaR-01_128	79.8	62.4	3.083	0.045	0.2462	0.003	11	1427	11	1418	15	1438	29	1438	29	1.39082	Core
18MaR-01	18MaR-01_128	105	1.8	1.89	0.043	0.1841	0.0019	15	1076	15	1089	11	1047	49	1047	49	4.01146	Rim
18MaR-01	18MaR-01_129	203	96.8	1.536	0.016	0.1585	0.0013	6.5	945.1	6.5	948.5	7.3	934	21	934	21	1.55246
18MaR-01	18MaR-01_131	248.9	79.6	4.802	0.042	0.3175	0.0022	7.4	1784.4	7.4	1777	11	1791	12	1791	12	0.781686
18MaR-01	18MaR-01_132	404	133.1	4.934	0.083	0.3101	0.006	15	1807	15	1739	29	1889	26	1889	26	7.94071
18MaR-01	18MaR-01_133	445	47.2	4.936	0.036	0.3254	0.0024	6.1	1807.9	6.1	1816	12	1796	11	1796	11	1.11359
18MaR-01	18MaR-01_134	133.4	95.5	14.39	0.12	0.5381	0.0044	8	2775	8	2775	19	2772.2	9.5	2772.2	9.5	0.101003
18MaR-01	18MaR-01_135	80.59	209.9	0.813	0.016	0.0989	0.0013	9.2	603.5	9.2	608	7.9	581	49	608	7.9	0.74565	Core
18MaR-01	18MaR-01_135	115.6	231.3	0.557	0.016	0.0666	0.0018	12	451	12	415	11	635	77	415	11	7.98226	Rim
18MaR-01	18MaR-01_136	45.6	39.8	14.58	0.16	0.5447	0.0059	10	2787	10	2802	25	2772	16	2772	16	1.08225
18MaR-01	18MaR-01_137	161	140	0.0805	0.0032	0.01255	0.00019	3	78.5	3	80.4	1.2	54	85	80.4	1.2	2.42038
18MaR-01	18MaR-01_138	71.5	41.1	4.392	0.072	0.2959	0.0034	13	1713	13	1670	17	1759	26	1759	26	5.05969
18MaR-01	18MaR-01_139	202.5	151.2	13.97	0.12	0.5229	0.0047	8.1	2746.6	8.1	2711	20	2771.7	8.7	2771.7	8.7	2.18999
18MaR-01	18MaR-01_140	76.9	65.7	14.409	0.095	0.5344	0.0036	6.3	2776.5	6.3	2760	15	2785	10	2785	10	0.897666
18MaR-01	18MaR-01_141	284.8	19.07	0.0803	0.0031	0.01154	0.00014	2.9	78.3	2.9	73.96	0.9	183	70	73.96	0.9	5.54278
18MaR-01	18MaR-01_142	69.2	52.3	14.37	0.16	0.543	0.0045	10	2773	10	2795	19	2755	13	2755	13	1.45191
18MaR-01	18MaR-01_143	267.8	174.5	4.588	0.035	0.3062	0.0021	6.5	1747.3	6.5	1722	10	1776	13	1776	13	3.04054
18MaR-01	18MaR-01_144	59.7	39.5	26.59	0.38	0.712	0.01	14	3367	14	3462	38	3309	15	3309	15	4.62375
18MaR-01	18MaR-01_145	310	314	0.0757	0.0025	0.01163	0.00014	2.3	74	2.3	74.52	0.91	83	67	74.52	0.91	0.702703
18MaR-01	18MaR-01_146	147.9	71.2	9.213	0.092	0.4217	0.004	8.7	2360	8.7	2268	18	2439	11	2439	11	7.01107	Core
18MaR-01	18MaR-01_146	614	127	4.6	0.15	0.3023	0.0054	26	1746	26	1702	26	1814	39	1814	39	6.1742	Rim
18MaR-01	18MaR-01_147	239	142	15.46	0.13	0.5778	0.0048	8.1	2842.8	8.1	2939	20	2773	10	2773	10	5.9863
18MaR-01	18MaR-01_148	88.6	12.5	13.86	0.12	0.5395	0.0038	8.7	2740.2	8.7	2781	16	2713	12	2713	12	2.50645
18MaR-01	18MaR-01_149	159.9	201.4	24.92	0.29	0.6316	0.0057	11	3303	11	3155	23	3398	13	3398	13	7.15127
18MaR-01	18MaR-01_150	74	59.1	14.47	0.11	0.541	0.0038	7.4	2780.1	7.4	2787	16	2774.1	9.6	2774.1	9.6	0.465016
18MaR-02	18MaR-02_1	759	468	0.0569	0.003	0.00782	0.0001	2.9	56	2.9	50.19	0.67	276	90	50.19	0.67	10.375
18MaR-02	18MaR-02_2	1040	457	0.0767	0.0019	0.01122	0.0001	1.8	75	1.8	71.94	0.65	169	52	71.94	0.65	4.08
18MaR-02	18MaR-02_3	118	183.5	4.009	0.051	0.2931	0.0027	10	1636	10	1657	14	1610	22	1610	22	2.91925
18MaR-02	18MaR-02_4	920	490	0.0776	0.002	0.01212	0.00013	1.9	76.1	1.9	77.67	0.84	51	51	77.67	0.84	2.06307
18MaR-02	18MaR-02_5	64	76.6	20.26	0.25	0.5911	0.0062	12	3102	12	2992	25	3178	13	3178	13	5.85274
18MaR-02	18MaR-02_6	104.4	41.6	3.291	0.063	0.2373	0.0038	15	1476	15	1372	20	1638	26	1638	26	16.2393
18MaR-02	18MaR-02_8	225	183	0.1079	0.0051	0.0152	0.00032	4.6	103.6	4.6	97.3	2	223	86	97.3	2	6.08108
18MaR-02	18MaR-02_9	265.3	88.3	4.057	0.036	0.2958	0.0024	7.2	1645.1	7.2	1670	12	1621	15	1621	15	3.02283
18MaR-02	18MaR-02_10	180	92.1	4.978	0.046	0.3339	0.0023	7.7	1814.8	7.7	1857	11	1779	14	1779	14	4.38449
18MaR-02	18MaR-02_11	416	212.4	0.1059	0.0058	0.01395	0.00018	5.1	101.8	5.1	89.3	1.2	358	88	89.3	1.2	12.279
18MaR-02	18MaR-02_12	158	77.3	12.86	0.13	0.4981	0.0041	9.9	2668.2	9.9	2605	18	2728	14	2728	14	4.5088
18MaR-02	18MaR-02_13	234	30.9	9.9	0.31	0.421	0.013	30	2415	30	2257	61	2570	12	2570	12	12.179
18MaR-02	18MaR-02_15	102.8	87.1	14.49	0.12	0.5459	0.0038	7.7	2781.5	7.7	2808	16	2768	12	2768	12	1.44509
18MaR-02	18MaR-02_16	217.3	92.9	23.46	0.21	0.6556	0.0057	8.8	3245.2	8.8	3249	22	3245.7	9.4	3245.7	9.4	0.101673
18MaR-02	18MaR-02_17	217	100.5	0.0439	0.0025	0.0065	0.00013	2.4	43.5	2.4	41.78	0.85	160	110	41.78	0.85	3.95402
18MaR-02	18MaR-02_18	75.5	24.8	1.601	0.033	0.1629	0.0018	13	968	13	972.4	9.9	950	44	950	44	2.35789
18MaR-02	18MaR-02_19	403.5	11.44	19.79	0.57	0.5852	0.0098	30	3075	30	2967	41	3147	26	3147	26	5.71973
18MaR-02	18MaR-02_20	550	108	10.98	0.5	0.465	0.019	48	2513	48	2469	82	2561	18	2561	18	3.59235
18MaR-02	18MaR-02_21	185	121.4	2.726	0.034	0.225	0.002	9.2	1334	9.2	1308	10	1373	21	1373	21	4.73416
18MaR-02	18MaR-02_22	117.7	119.8	15.06	0.13	0.5599	0.0041	8.1	2817.9	8.1	2866	17	2782	10	2782	10	3.01941
18MaR-02	18MaR-02_23	112.6	60.7	0.0958	0.0059	0.01471	0.00027	5.5	92.4	5.5	94.2	1.7	70	110	94.2	1.7	1.94805
18MaR-02	18MaR-02_24	470	696	22.04	0.38	0.5973	0.0097	17	3181	17	3015	39	3289.6	7.8	3289.6	7.8	8.34752
18MaR-02	18MaR-02_25	117.7	96.7	12.81	0.11	0.4996	0.0042	8.1	2664.4	8.1	2611	18	2704	13	2704	13	3.43935
18MaR-02	18MaR-02_26	386.8	311.7	2.662	0.061	0.2041	0.0041	17	1316	17	1197	22	1519	32	1519	32	21.1982	Core
18MaR-02	18MaR-02_26	734	156.2	1.506	0.036	0.1331	0.0024	14	931	14	805	13	1245	32	805	13	13.5338	Rim
18MaR-02	18MaR-02_27	112.3	90.7	0.0161	0.0034	0.002266	9.9e-05	3.4	16	3.4	14.59	0.64	-90	310	14.59	0.64	8.8125
18MaR-02	18MaR-02_28	840	399	0.0571	0.0035	0.00791	0.00014	3.4	56.6	3.4	50.77	0.93	260	110	50.77	0.93	10.3004
18MaR-02	18MaR-02_29	346	23.1	5.47	0.24	0.3053	0.0042	35	1876	35	1717	21	2040	57	2040	57	15.8333
18MaR-02	18MaR-02_31	169.4	162.8	4.617	0.042	0.3109	0.0023	7.7	1751.3	7.7	1745	11	1757	19	1757	19	0.682982
18MaR-02	18MaR-02_32	295	72.9	13.21	0.5	0.405	0.014	32	2677	32	2184	62	3098	18	3098	18	29.5029
18MaR-02	18MaR-02_35	223	60.5	2.821	0.036	0.2368	0.0022	9.3	1361	9.3	1370	11	1343	24	1343	24	2.01042
18MaR-02	18MaR-02_36	839	195	9.85	0.65	0.379	0.019	62	2368	62	2055	91	2680	33	2680	33	23.3209
18MaR-02	18MaR-02_37	542	98.9	9.229	0.097	0.4117	0.0044	9.9	2360.8	9.9	2221	20	2484	11	2484	11	10.5878
18MaR-02	18MaR-02_38	228	125.5	14.336	0.093	0.5347	0.0029	6.2	2771.5	6.2	2761	12	2776.2	9.1	2776.2	9.1	0.547511
18MaR-02	18MaR-02_39	173	100.5	23.92	0.19	0.6794	0.0055	7.7	3265.3	7.7	3341	21	3216.1	9.3	3216.1	9.3	3.88359
18MaR-02	18MaR-02_40	177	183	4.098	0.064	0.2871	0.004	13	1652	13	1626	20	1681	24	1681	24	3.27186
18MaR-02	18MaR-02_41	94.8	26.7	9.34	0.13	0.3791	0.0056	13	2372	13	2071	26	2640	21	2640	21	21.553
18MaR-02	18MaR-02_42	46.7	79.7	14.03	0.24	0.5347	0.0074	16	2747	16	2759	31	2736	20	2736	20	0.840643
18MaR-02	18MaR-02_44	853	89.7	4.537	0.054	0.3044	0.0034	10	1738	10	1713	17	1768	18	1768	18	3.11086
18MaR-02	18MaR-02_45	239.6	175	21.46	0.18	0.6068	0.005	7.9	3158.9	7.9	3056	20	3220	10	3220	10	5.09317
18MaR-02	18MaR-02_46	219.3	37.9	20.82	0.19	0.5892	0.0056	9.1	3129	9.1	2985	23	3218.4	9.9	3218.4	9.9	7.25205
18MaR-02	18MaR-02_47	623	564	0.0841	0.0026	0.01204	0.00013	2.5	81.9	2.5	77.13	0.82	212	65	77.13	0.82	5.82418
18MaR-02	18MaR-02_48	122.3	100.3	12.54	0.13	0.4853	0.0047	10	2645	10	2549	20	2718	15	2718	15	6.21781
18MaR-02	18MaR-02_49	376	303.4	6.54	0.17	0.3585	0.0068	25	2043	25	1973	33	2123	19	2123	19	7.06547
18MaR-02	18MaR-02_50	269	194.5	3.984	0.047	0.29	0.0033	9.5	1629.4	9.5	1641	17	1611	18	1611	18	1.8622
18MaR-02	18MaR-02_51	188.4	95.7	2.559	0.044	0.2114	0.0031	12	1287	12	1236	16	1375	24	1375	24	10.1091
18MaR-02	18MaR-02_53	219	86.8	13.29	0.2	0.5179	0.0058	14	2699	14	2689	24	2707	16	2707	16	0.664943
18MaR-02	18MaR-02_54	804	377	0.0963	0.0024	0.01472	0.00015	2.2	93.3	2.2	94.2	0.95	81	46	94.2	0.95	0.96463
18MaR-02	18MaR-02_55	225	113.4	0.0787	0.004	0.01148	0.00022	3.8	77.1	3.8	73.6	1.4	184	98	73.6	1.4	4.53956
18MaR-02	18MaR-02_56	983	697	0.1119	0.0026	0.01607	0.00016	2.5	107.9	2.5	102.8	1	217	54	102.8	1	4.7266
18MaR-02	18MaR-02_57	635	77.7	10.16	0.14	0.4304	0.0044	13	2451	13	2307	20	2565	16	2565	16	10.0585
18MaR-02	18MaR-02_58	489	482	0.0118	0.0012	0.001815	5.6e-05	1.2	11.9	1.2	11.69	0.36	90	180	11.69	0.36	1.76471
18MaR-02	18MaR-02_59	185.7	172	14.49	0.17	0.5443	0.0064	11	2780	11	2800	27	2768	11	2768	11	1.15607
18MaR-02	18MaR-02_60	564	38.3	8.31	0.27	0.3739	0.0088	29	2258	29	2044	42	2458	20	2458	20	16.843
18MaR-02	18MaR-02_61	419	448	0.034	0.0017	0.005386	9.1e-05	1.6	33.9	1.6	34.62	0.59	21	93	34.62	0.59	2.12389
18MaR-02	18MaR-02_62	166	29.2	9.45	0.19	0.4332	0.0079	18	2380	18	2318	35	2434	21	2434	21	4.76582	Core
18MaR-02	18MaR-02_62	419	25.7	5.41	0.15	0.3366	0.0058	24	1881	24	1869	28	1892	49	1892	49	1.21564	Rim
18MaR-02	18MaR-02_63	168.8	95.5	0.0027	0.0016	1e-05	1.7e-05	1.6	2.7	1.6	0.07	0.11	-50000	27000	0.07	0.11	97.4074
18MaR-02	18MaR-02_64	292	136.2	9.32	0.37	0.395	0.013	35	2346	35	2135	58	2552	16	2552	16	16.3401
18MaR-02	18MaR-02_65	102.4	42.7	0.1153	0.0083	0.01583	0.0003	7.5	109.8	7.5	101.2	1.9	250	130	101.2	1.9	7.83242
18MaR-02	18MaR-02_66	336	114.2	0.0739	0.003	0.01121	0.00018	2.8	72.2	2.8	71.9	1.1	96	78	71.9	1.1	0.415512
18MaR-02	18MaR-02_67	110.5	268.7	12.66	0.1	0.4832	0.0045	7.8	2654.1	7.8	2540	19	2745	14	2745	14	7.46812
18MaR-02	18MaR-02_68	196	141.6	13.7	0.12	0.5148	0.0044	8	2728.2	8	2676	19	2763	11	2763	11	3.14875
18MaR-02	18MaR-02_69	313	157	11.23	0.33	0.437	0.011	29	2530	29	2331	48	2695	20	2695	20	13.5065
18MaR-02	18MaR-02_70	496	468	1.988	0.02	0.1864	0.0014	6.9	1110.9	6.9	1101.6	7.6	1125	19	1125	19	2.08
18MaR-02	18MaR-02_71	200.5	270.1	12.73	0.1	0.5012	0.0035	7.4	2659	7.4	2621	15	2684	11	2684	11	2.34724
18MaR-02	18MaR-02_73	338	66.7	24.32	0.21	0.6678	0.0057	8	3281.8	8	3296	22	3267	10	3267	10	0.887665
18MaR-02	18MaR-02_74	220	235.8	13.67	0.21	0.5274	0.0068	16	2724	16	2728	29	2717	11	2717	11	0.404858
18MaR-02	18MaR-02_75	60.9	28.9	4.393	0.075	0.3033	0.0032	14	1709	14	1707	16	1704	27	1704	27	0.176056
18MaR-02	18MaR-02_76	166	72.9	10.36	0.18	0.4193	0.0067	16	2467	16	2255	30	2629	18	2629	18	14.2259
18MaR-02	18MaR-02_77	123.3	60.9	13.78	0.17	0.5259	0.0071	12	2733	12	2722	30	2736	17	2736	17	0.511696
18MaR-02	18MaR-02_80	436	51.5	12.38	0.72	0.399	0.016	51	2604	51	2158	71	2975	30	2975	30	27.4622
18MaR-02	18MaR-02_81	796	1756	0.0795	0.0021	0.01194	0.00016	1.9	77.6	1.9	76.5	1	114	53	76.5	1	1.41753
18MaR-02	18MaR-02_82	75.9	89.7	3.573	0.058	0.2526	0.003	13	1543	13	1451	15	1665	27	1665	27	12.8529
18MaR-02	18MaR-02_84	606	97.1	0.0838	0.0028	0.01153	0.00018	2.7	82	2.7	73.9	1.2	306	70	73.9	1.2	9.87805
18MaR-02	18MaR-02_85	113.2	42.5	12.64	0.14	0.507	0.0048	11	2651	11	2643	21	2651	17	2651	17	0.301773
18MaR-02	18MaR-02_86	948	63.5	8.42	0.19	0.38	0.0081	21	2271	21	2079	36	2453	16	2453	16	15.2466
18MaR-02	18MaR-02_88	235	193.3	21.89	0.17	0.6219	0.0051	7.8	3179.2	7.8	3116	20	3218	11	3218	11	3.16967
18MaR-02	18MaR-02_89	69.6	31.4	17.89	0.38	0.5424	0.0066	21	2978	21	2792	27	3103	28	3103	28	10.0226
18MaR-02	18MaR-02_90	421	183	27.1	0.48	0.658	0.011	21	3379	21	3255	43	3451	22	3451	22	5.67951
18MaR-02	18MaR-02_92	681	274	0.3233	0.0049	0.04454	0.00031	3.7	284.2	3.7	280.9	1.9	299	33	280.9	1.9	1.16115
18MaR-02	18MaR-02_93	203	103	14.03	0.13	0.5345	0.0049	9	2750.7	9	2759	21	2738	12	2738	12	0.766983
18MaR-02	18MaR-02_94	89.4	131.4	13.47	0.15	0.5058	0.0059	10	2713	10	2637	25	2761	18	2761	18	4.49113
18MaR-02	18MaR-02_95	286.5	158.5	0.0285	0.002	0.004201	9.1e-05	1.9	28.4	1.9	27.02	0.59	120	130	27.02	0.59	4.85915
18MaR-02	18MaR-02_96	660	341	0.0515	0.0019	0.00799	0.0001	1.7	51.1	1.7	51.28	0.64	36	69	51.28	0.64	0.35225
18MaR-02	18MaR-02_97	289	270	0.0924	0.004	0.01397	0.00022	3.6	89.4	3.6	89.5	1.4	105	83	89.5	1.4	0.111857
18MaR-02	18MaR-02_98	211	184.2	13.33	0.14	0.5111	0.0042	9.1	2704.9	9.1	2661	18	2722	16	2722	16	2.241
18MaR-02	18MaR-02_99	356	257	1.105	0.019	0.1191	0.0018	9.8	755.6	9.8	725	10	836	31	725	10	4.04976
18MaR-02	18MaR-02_100	280	210.8	13.7	0.17	0.5123	0.0072	12	2727	12	2664	31	2767	12	2767	12	3.72244
18MaR-02	18MaR-02_101	687	168	14.82	0.54	0.445	0.014	37	2785	37	2362	66	3121	23	3121	23	24.3191
18MaR-02	18MaR-02_102	339.2	213.2	0.0881	0.0033	0.0133	0.0002	3.1	85.5	3.1	85.2	1.3	100	73	85.2	1.3	0.350877
18MaR-02	18MaR-02_103	1011	323	9.04	0.24	0.392	0.01	24	2332	24	2124	47	2503	16	2503	16	15.1418
18MaR-02	18MaR-02_105	621	276	13.89	0.17	0.5118	0.0069	12	2742	12	2662	30	2795	17	2795	17	4.7585
18MaR-02	18MaR-02_106	538	157	2.154	0.031	0.1981	0.0025	10	1165	10	1165	13	1160	23	1160	23	0.431034
18MaR-02	18MaR-02_107	61.8	255.2	4.566	0.081	0.2839	0.0041	15	1740	15	1610	21	1890	32	1890	32	14.8148
18MaR-02	18MaR-02_108	1718	819	0.0798	0.0018	0.0116	9.8e-05	1.7	77.9	1.7	74.35	0.63	178	43	74.35	0.63	4.55712
18MaR-02	18MaR-02_109	584	282	0.1064	0.0038	0.01472	0.00016	3.6	103	3.6	94.2	1	276	76	94.2	1	8.54369
18MaR-02	18MaR-02_110	790	269	1.617	0.018	0.1597	0.0015	6.9	976.1	6.9	954.7	8.2	1017	18	1017	18	6.12586
18MaR-02	18MaR-02_111	111.6	2.57	5.32	0.087	0.2906	0.0028	14	1869	14	1644	14	2126	25	2126	25	22.6717
18MaR-02	18MaR-02_112	499	44.4	11.146	0.08	0.4687	0.0037	6.8	2534.7	6.8	2477	16	2582	10	2582	10	4.06662
18MaR-02	18MaR-02_113	101.5	51.2	1.992	0.031	0.183	0.0016	11	1112	11	1083.1	8.9	1166	31	1166	31	7.10978
18MaR-02	18MaR-02_114	780	378	4.246	0.042	0.285	0.0031	8.1	1682.3	8.1	1616	15	1764	14	1764	14	8.39002
18MaR-02	18MaR-02_115	43.5	82.9	1.341	0.044	0.1321	0.0025	19	859	19	799	14	1004	60	799	14	6.98487
18MaR-02	18MaR-02_116	283.2	110.5	1.707	0.024	0.1649	0.0018	9.1	1009.6	9.1	984	10	1077	25	1077	25	8.6351
18MaR-02	18MaR-02_117	300.1	108.1	3.498	0.056	0.2453	0.0032	13	1525	13	1413	16	1689	17	1689	17	16.341
18MaR-02	18MaR-02_118	220.5	152.6	4.03	0.038	0.2884	0.0023	7.7	1639.2	7.7	1633	12	1651	16	1651	16	1.09025
18MaR-02	18MaR-02_119	139	96.9	3.286	0.035	0.261	0.002	8.3	1476.5	8.3	1495	10	1457	19	1457	19	2.6081
18MaR-02	18MaR-02_120	90.4	69.2	14.46	0.16	0.5392	0.0059	10	2779	10	2778	25	2785	14	2785	14	0.251346
18MaR-02	18MaR-02_121	216.8	33.8	11.543	0.09	0.4677	0.0035	7.3	2567.2	7.3	2473	16	2647	11	2647	11	6.57348
18MaR-02	18MaR-02_122	315	87.1	9.72	0.12	0.4477	0.0051	11	2408	11	2387	22	2435	10	2435	10	1.97125
18MaR-02	18MaR-02_123	93.5	65.6	0.0221	0.0041	0.00167	0.00012	4	22	4	10.78	0.75	1010	390	10.78	0.75	51
18MaR-02	18MaR-02_124	140	51.7	12.71	0.21	0.503	0.0049	16	2654	16	2626	21	2681	18	2681	18	2.05147
18MaR-02	18MaR-02_125	745	507	0.1053	0.0029	0.01546	0.00016	2.6	101.5	2.6	98.9	1	181	57	98.9	1	2.56158
18MaR-02	18MaR-02_126	135	105.1	11.95	0.17	0.4604	0.0048	13	2599	13	2440	21	2729	16	2729	16	10.59
18MaR-02	18MaR-02_127	410	424	0.0805	0.0028	0.01219	0.00014	2.6	78.5	2.6	78.1	0.87	126	73	78.1	0.87	0.509554
18MaR-02	18MaR-02_128	266.8	194.6	11.75	0.11	0.4519	0.0043	8.8	2584.7	8.8	2403	19	2736	11	2736	11	12.1711
18MaR-02	18MaR-02_129	334	282	0.0897	0.0033	0.01348	0.00016	3.1	87	3.1	86.3	1	119	72	86.3	1	0.804598
18MaR-02	18MaR-02_131	242.7	162.1	2.791	0.03	0.2341	0.0019	8.1	1351.9	8.1	1355.7	9.7	1346	18	1346	18	0.720654
18MaR-02	18MaR-02_132	326	280	0.0761	0.0032	0.01116	0.00015	3	74.3	3	71.51	0.96	161	83	71.51	0.96	3.75505
18MaR-02	18MaR-02_133	601	337.3	13.82	0.46	0.5	0.014	32	2735	32	2607	62	2864	30	2864	30	8.97346
18MaR-02	18MaR-02_135	159	234	9.85	0.25	0.3975	0.009	25	2416	25	2154	43	2646	15	2646	15	18.5941
18MaR-02	18MaR-02_136	42.3	47.9	23.21	0.27	0.6105	0.007	11	3233	11	3070	28	3340	13	3340	13	8.08383
18MaR-02	18MaR-02_137	103.3	77.1	13.5	0.13	0.5113	0.0048	9.2	2714.2	9.2	2661	20	2754	14	2754	14	3.37691
18MaR-02	18MaR-02_138	203.6	196.9	14.27	0.16	0.5323	0.0068	11	2767	11	2750	29	2769	13	2769	13	0.686168
18MaR-02	18MaR-02_139	831	71.9	4.578	0.039	0.3053	0.0026	6.9	1745.4	6.9	1717	13	1774	16	1774	16	3.21308
18MaR-02	18MaR-02_141	422	16.3	13.77	0.4	0.525	0.01	29	2734	29	2719	42	2736	24	2736	24	0.621345	Core
18MaR-02	18MaR-02_141	1005	35.6	4.48	0.09	0.2986	0.005	16	1725	16	1683	25	1792	25	1792	25	6.08259	Rim
18MaR-02	18MaR-02_142	489	10.07	4.576	0.084	0.2852	0.0087	15	1743	15	1615	44	1906	44	1906	44	15.2676
18MaR-02	18MaR-02_143	71.2	38.3	12.97	0.27	0.4927	0.0092	20	2672	20	2579	39	2744	27	2744	27	6.01312
18MaR-02	18MaR-02_144	145	137.4	14.22	0.12	0.5316	0.0049	7.7	2764.4	7.7	2747	21	2771.9	9.5	2771.9	9.5	0.898301
18MaR-02	18MaR-02_145	275	85.2	1.65	0.02	0.1673	0.0013	7.6	988.5	7.6	996.8	7.3	962	23	962	23	3.61746
18MaR-02	18MaR-02_146	141	71.8	12.12	0.21	0.4881	0.005	16	2610	16	2561	22	2647	21	2647	21	3.24896
18MaR-02	18MaR-02_148	98.3	80.5	14.41	0.18	0.5419	0.0056	12	2775	12	2790	24	2763	14	2763	14	0.977199
18MaR-02	18MaR-02_149	282.4	118.2	0.0996	0.0042	0.01496	0.00028	3.9	96.1	3.9	95.7	1.8	124	83	95.7	1.8	0.416233
18MaR-02	18MaR-02_150	247	196	0.0756	0.0044	0.01132	0.00023	4.1	73.8	4.1	72.6	1.5	90	110	72.6	1.5	1.62602
18MiR-01	18MiR-01_1	207	89.3	0.0963	0.0055	0.01411	0.00026	5.1	92.9	5.1	90.3	1.6	160	110	90.3	1.6	2.79871
18MiR-01	18MiR-01_2	1118	665	3.845	0.041	0.2824	0.0032	8.5	1601.1	8.5	1603	16	1591	16	1591	16	0.754243
18MiR-01	18MiR-01_3	226.4	160.3	0.1757	0.006	0.02575	0.00048	5.2	163.9	5.2	163.9	3	201	73	163.9	3	0
18MiR-01	18MiR-01_5	94.9	106	5.128	0.07	0.3333	0.0035	12	1838	12	1854	17	1811	22	1811	22	2.37438
18MiR-01	18MiR-01_6	532	302	0.207	0.0057	0.02971	0.00052	4.8	190.6	4.8	188.7	3.3	219	55	188.7	3.3	0.996852
18MiR-01	18MiR-01_9	215	188	0.0735	0.0048	0.01177	0.00028	4.5	71.6	4.5	75.4	1.8	30	120	75.4	1.8	5.30726
18MiR-01	18MiR-01_10	622	270	0.0759	0.0033	0.01145	0.00024	3.1	74.2	3.1	73.4	1.5	101	82	73.4	1.5	1.07817
18MiR-01	18MiR-01_12	216.1	108.6	4.523	0.076	0.2979	0.0045	14	1734	14	1680	23	1787	23	1787	23	5.98769
18MiR-01	18MiR-01_17	527	373	1.523	0.024	0.1524	0.0022	9.6	938.3	9.6	914	13	999	25	999	25	8.50851
18MiR-01	18MiR-01_20	106.7	62.6	5.03	0.14	0.3166	0.0071	23	1822	23	1772	35	1871	48	1871	48	5.29129	Core
18MiR-01	18MiR-01_20	239.1	40.1	3.357	0.082	0.2528	0.0049	19	1491	19	1452	25	1537	44	1537	44	5.53025	Rim
18MiR-01	18MiR-01_21	196	62.4	4.059	0.084	0.2792	0.004	17	1644	17	1586	20	1723	29	1723	29	7.95125
18MiR-01	18MiR-01_23	165	165	4.057	0.064	0.289	0.0035	13	1643	13	1636	18	1661	22	1661	22	1.50512
18MiR-01	18MiR-01_24	390	141.6	3.225	0.037	0.2606	0.0028	8.8	1462	8.8	1492	15	1422	18	1422	18	4.92264
18MiR-01	18MiR-01_25	242.9	289.2	0.0781	0.0051	0.01118	0.00021	4.1	74.8	4.1	71.7	1.4	180	110	71.7	1.4	4.14439
18MiR-01	18MiR-01_28	213.5	93	3.857	0.07	0.2695	0.0053	15	1602	15	1537	27	1700	33	1700	33	9.58824
18MiR-01	18MiR-01_29	448	436	0.1798	0.005	0.02646	0.00042	4.4	168	4.4	168.3	2.6	169	52	168.3	2.6	0.178571
18MiR-01	18MiR-01_31	557	224	5.219	0.053	0.3348	0.0034	8.6	1854.6	8.6	1861	16	1858	17	1858	17	0.161464
18MiR-01	18MiR-01_32	607	178.5	3.799	0.067	0.2808	0.005	14	1592	14	1594	25	1596	19	1596	19	0.125313
18MiR-01	18MiR-01_33	240.3	296.2	5.142	0.064	0.3329	0.0039	11	1841	11	1852	19	1840	22	1840	22	0.652174
18MiR-01	18MiR-01_35	1250	443	4.59	0.071	0.3153	0.0052	13	1747	13	1766	25	1744	21	1744	21	1.26147	Core
18MiR-01	18MiR-01_35	2104	37.3	3.589	0.049	0.2689	0.0036	11	1546	11	1535	18	1572	18	1572	18	2.35369	Rim
18MiR-01	18MiR-01_36	524	217.7	0.081	0.0028	0.0128	0.00018	2.6	78.9	2.6	82	1.1	34	64	82	1.1	3.92902
18MiR-01	18MiR-01_37	947	331	3.284	0.064	0.2383	0.0047	15	1475	15	1377	25	1640	19	1640	19	16.0366
18MiR-01	18MiR-01_38	262	182.8	2.593	0.038	0.2214	0.0026	11	1298	11	1289	14	1330	26	1330	26	3.08271
18MiR-01	18MiR-01_40	433.8	232.9	0.0975	0.004	0.01439	0.00026	3.6	94.2	3.6	92.1	1.6	156	78	92.1	1.6	2.2293
18MiR-01	18MiR-01_41	642	340.8	0.0916	0.0039	0.01367	0.00022	3.6	88.8	3.6	87.5	1.4	167	83	87.5	1.4	1.46396
18MiR-01	18MiR-01_44	255	290.8	13.76	0.19	0.5389	0.0074	13	2732	13	2776	31	2715	17	2715	17	2.24678
18MiR-01	18MiR-01_51	2373	230.6	0.2296	0.0054	0.03063	0.00068	4.5	209.5	4.5	194.4	4.3	385	45	194.4	4.3	7.20764
18MiR-01	18MiR-01_53	303	108.2	2.893	0.052	0.2349	0.004	14	1378	14	1359	21	1420	31	1420	31	4.29577
18MiR-01	18MiR-01_54	855	422	0.1091	0.0036	0.01566	0.00021	3.3	105	3.3	100.2	1.4	231	70	100.2	1.4	4.57143
18MiR-01	18MiR-01_56	137	123	4.16	0.058	0.301	0.0039	12	1666	12	1698	19	1642	26	1642	26	3.41048
18MiR-01	18MiR-01_57	740	307	0.1998	0.0048	0.0292	0.0004	4.1	184.7	4.1	185.8	2.6	182	50	185.8	2.6	0.59556
18MiR-01	18MiR-01_58	445	264	0.0758	0.0031	0.0115	0.00019	2.9	74	2.9	73.7	1.2	124	80	73.7	1.2	0.405405
18MiR-01	18MiR-01_59	946	274.1	0.0894	0.0033	0.01246	0.00038	3	86.8	3	79.8	2.4	294	77	79.8	2.4	8.06452
18MiR-01	18MiR-01_60	440	154.7	4.422	0.067	0.3111	0.0044	12	1716	12	1745	21	1688	21	1688	21	3.37678
18MiR-01	18MiR-01_61	41.6	38.2	5.39	0.13	0.3324	0.007	21	1882	21	1848	34	1932	42	1932	42	4.34783
18MiR-01	18MiR-01_62	990	468	0.0773	0.0031	0.01159	0.00022	2.9	75.4	2.9	74.3	1.4	125	70	74.3	1.4	1.45889
18MiR-01	18MiR-01_63	833	706	0.1835	0.0042	0.02683	0.00042	3.6	170.9	3.6	170.7	2.6	201	48	170.7	2.6	0.117028
18MiR-01	18MiR-01_64	552	298	0.0742	0.0028	0.01152	0.00019	2.7	72.5	2.7	73.9	1.2	81	77	73.9	1.2	1.93103
18MiR-01	18MiR-01_65	151.1	66.6	0.1975	0.0083	0.02865	0.00051	7	182.1	7	182.1	3.2	195	81	182.1	3.2	0
18MiR-01	18MiR-01_67	468	209.1	0.0781	0.0039	0.01011	0.00019	3.6	76.1	3.6	64.9	1.2	420	100	64.9	1.2	14.7175
18MiR-01	18MiR-01_68	1680	880	0.0914	0.0027	0.01389	0.00019	2.5	88.7	2.5	88.9	1.2	100	55	88.9	1.2	0.225479
18MiR-01	18MiR-01_69	520	258.9	0.0964	0.0061	0.01397	0.00034	5.7	93.2	5.7	89.4	2.2	190	120	89.4	2.2	4.07725
18MiR-01	18MiR-01_70	105.1	34.8	0.0782	0.0059	0.01186	0.00032	5.7	76.6	5.7	76	2.1	130	140	76	2.1	0.78329
18MiR-01	18MiR-01_71	1700	706	0.0808	0.0021	0.01202	0.00017	2	78.9	2	77	1.1	182	56	77	1.1	2.40811
18MiR-01	18MiR-01_72	208	185.5	3.6	0.1	0.253	0.0074	22	1543	22	1455	39	1685	39	1685	39	13.6499
18MiR-01	18MiR-01_73	89.4	103.8	12.97	0.17	0.5132	0.006	12	2675	12	2672	26	2691	18	2691	18	0.706057
18MiR-01	18MiR-01_74	386	350	7.88	0.15	0.4023	0.0056	18	2218	18	2179	26	2265	26	2265	26	3.79691
18MiR-01	18MiR-01_75	400	231.3	5.51	0.068	0.3445	0.0043	10	1901	10	1910	21	1905	20	1905	20	0.262467
18MiR-01	18MiR-01_79	102.8	37.4	0.1273	0.0089	0.01801	0.00046	7.9	120.5	7.9	115.1	2.9	220	140	115.1	2.9	4.48133
18MiR-01	18MiR-01_82	922	223.6	0.1143	0.0031	0.01722	0.0002	2.8	109.8	2.8	110.1	1.3	129	54	110.1	1.3	0.273224
18MiR-01	18MiR-01_83	713	372	4.656	0.048	0.3201	0.0033	8.6	1758.2	8.6	1790	16	1733	14	1733	14	3.28909
18MiR-01	18MiR-01_84	893	509	0.0722	0.0024	0.01125	0.00019	2.3	70.7	2.3	72.1	1.2	63	66	72.1	1.2	1.9802
18MiR-01	18MiR-01_85	650	335	0.0765	0.0027	0.01177	0.00017	2.5	74.7	2.5	75.4	1.1	77	68	75.4	1.1	0.937082
18MiR-01	18MiR-01_86	570	284	4.829	0.051	0.3194	0.0033	8.8	1788.5	8.8	1786	16	1798	13	1798	13	0.667408
18MiR-01	18MiR-01_87	1871	1021	0.0852	0.0022	0.01225	0.00022	2	83	2	78.5	1.4	225	49	78.5	1.4	5.42169
18MiR-01	18MiR-01_88	1312	474	2.76	0.048	0.1985	0.0035	13	1343	13	1167	19	1644	22	1644	22	29.0146
18MiR-01	18MiR-01_89	570	390	0.0719	0.0029	0.01091	0.00019	2.8	70.3	2.8	70	1.2	106	77	70	1.2	0.426743
18MiR-01	18MiR-01_95	1380	930	0.077	0.0029	0.01203	0.00021	2.8	75.2	2.8	77.1	1.3	20	71	77.1	1.3	2.5266
18MiR-01	18MiR-01_96	521	249	0.0848	0.0038	0.01181	0.0002	3.6	82.4	3.6	75.7	1.3	238	85	75.7	1.3	8.13107
18MiR-01	18MiR-01_98	339.5	254	5.839	0.094	0.3429	0.0049	14	1949	14	1899	23	1997	18	1997	18	4.90736
18MiR-01	18MiR-01_99	841	592	0.0766	0.0029	0.01174	0.00023	2.7	74.9	2.7	75.2	1.5	73	72	75.2	1.5	0.400534
18MiR-01	18MiR-01_100	430	139.6	4.678	0.071	0.3183	0.0048	13	1762	13	1780	23	1738	18	1738	18	2.41657
18MiR-01	18MiR-01_101	926	441	0.0789	0.0023	0.01149	0.00021	2.1	77.1	2.1	73.7	1.3	189	57	73.7	1.3	4.40986
18MiR-01	18MiR-01_102	144.9	71.5	1.897	0.036	0.1792	0.0028	12	1079	12	1062	15	1096	39	1096	39	3.10219
18MiR-01	18MiR-01_106	501	301	0.3878	0.0084	0.0521	0.00064	6.1	332	6.1	327.4	3.9	338	45	327.4	3.9	1.38554
18MiR-01	18MiR-01_110	773	326	0.2391	0.0069	0.03356	0.00069	5.6	217.1	5.6	212.7	4.3	242	51	212.7	4.3	2.02672
18MiR-01	18MiR-01_111	1046	244	0.0812	0.0026	0.01242	0.00033	2.4	79.2	2.4	79.6	2.1	95	66	79.6	2.1	0.505051
18MiR-01	18MiR-01_112	783	166.9	0.0817	0.0025	0.012	0.00019	2.4	79.7	2.4	76.9	1.2	145	62	76.9	1.2	3.51317
18MiR-01	18MiR-01_113	599	447	0.0937	0.003	0.01384	0.0002	2.7	90.8	2.7	88.6	1.3	153	64	88.6	1.3	2.42291
18MiR-01	18MiR-01_114	633	518	0.4551	0.0085	0.05954	0.00073	5.9	380.3	5.9	372.8	4.5	413	37	372.8	4.5	1.97213
18MiR-01	18MiR-01_115	479	346	0.0786	0.0034	0.01161	0.00026	3.2	76.6	3.2	74.4	1.7	121	73	74.4	1.7	2.87206
18MiR-01	18MiR-01_117	313	204.5	2.421	0.042	0.198	0.0027	13	1248	13	1164	14	1371	32	1371	32	15.0985
18MiR-01	18MiR-01_123	142.8	68.2	3.14	0.068	0.2369	0.0046	17	1439	17	1370	24	1529	35	1529	35	10.399
18MiR-01	18MiR-01_124	58.3	19.36	0.179	0.015	0.02598	0.0009	12	165	12	165.2	5.6	160	150	165.2	5.6	0.121212
18MiR-01	18MiR-01_125	806	774	0.0805	0.0027	0.01179	0.00025	2.6	78.5	2.6	75.6	1.6	169	63	75.6	1.6	3.69427
18MiR-01	18MiR-01_129	579	354	0.0926	0.004	0.01223	0.00022	3.8	90.4	3.8	78.4	1.4	380	95	78.4	1.4	13.2743
18MiR-01	18MiR-01_130	403	196	0.077	0.0034	0.01144	0.00023	3.2	75.2	3.2	73.3	1.4	127	85	73.3	1.4	2.5266
18MR-01	18MR-01_3	100.5	45.4	4.971	0.061	0.3271	0.0036	10	1813	10	1826	18	1793	18	1793	18	1.84049
18MR-01	18MR-01_4	451	325.7	20.32	0.15	0.5756	0.0045	7.2	3106	7.2	2930	18	3220.2	5.2	3220.2	5.2	9.01186
18MR-01	18MR-01_5	112.9	93.1	13.12	0.1	0.505	0.0036	7.3	2687.7	7.3	2635	15	2725	10	2725	10	3.30275
18MR-01	18MR-01_6	76.8	52.3	0.797	0.014	0.09255	0.00086	8.1	595.1	8.1	570.5	5.1	681	42	570.5	5.1	4.13376
18MR-01	18MR-01_8	94.7	84	14.566	0.097	0.5385	0.0034	6.3	2786.7	6.3	2777	14	2789	10	2789	10	0.430262
18MR-01	18MR-01_9	50.2	36.7	1.874	0.034	0.1754	0.0017	12	1070	12	1041.5	9.5	1114	34	1114	34	6.50808
18MR-01	18MR-01_10	362	220	23.32	0.45	0.5917	0.0058	19	3236	19	2995	23	3381	29	3381	29	11.4167
18MR-01	18MR-01_11	167	99	24.54	0.9	0.657	0.017	36	3276	36	3247	68	3292	21	3292	21	1.36695	Core
18MR-01	18MR-01_11	471	166.1	10.14	0.19	0.4503	0.0067	18	2446	18	2396	30	2483	29	2483	29	3.50383	Rim
18MR-01	18MR-01_12	39	13.76	1.621	0.041	0.1609	0.0022	16	974	16	961	12	984	47	984	47	2.3374
18MR-01	18MR-01_13	361	271.8	0.5055	0.0066	0.0653	0.00045	4.4	415.1	4.4	407.7	2.7	446	29	407.7	2.7	1.7827
18MR-01	18MR-01_14	762	645	0.1034	0.0019	0.01551	0.00012	1.8	99.9	1.8	99.22	0.77	115	38	99.22	0.77	0.680681
18MR-01	18MR-01_15	1873	874	0.0707	0.001	0.010872	9.4e-05	0.95	69.37	0.95	69.71	0.6	58	30	69.71	0.6	0.490125
18MR-01	18MR-01_16	64.2	40.9	5.132	0.057	0.3277	0.0025	9.6	1839.9	9.6	1827	12	1850	20	1850	20	1.24324
18MR-01	18MR-01_17	638	537	2.901	0.035	0.2363	0.0023	9.1	1381.4	9.1	1367	12	1398	16	1398	16	2.21745
18MR-01	18MR-01_18	1.86	1.51	87	22	1.11	0.26	240	4010	240	4230	690	4183	94	4183	94	1.1236
18MR-01	18MR-01_19	571	132.2	9.42	0.31	0.398	0.01	33	2370	33	2156	48	2561	19	2561	19	15.8141	Core
18MR-01	18MR-01_19	1371	1237	0.0767	0.0024	0.01184	0.00027	2.2	75	2.2	75.9	1.7	55	56	75.9	1.7	1.2	Rim
18MR-01	18MR-01_20	877	47	12.212	0.095	0.404	0.028	7.3	2620.5	7.3	2170	130	3010	110	3010	110	27.907	Core
18MR-01	18MR-01_21	92.5	62.6	14.89	0.12	0.5522	0.0044	7.6	2807.4	7.6	2834	18	2788.2	9.9	2788.2	9.9	1.64264
18MR-01	18MR-01_22	687	634	0.1105	0.002	0.01661	0.00012	1.8	106.6	1.8	106.2	0.78	108	38	106.2	0.78	0.375235
18MR-01	18MR-01_23	441	214	4.957	0.025	0.3252	0.0015	4.3	1811.7	4.3	1814.7	7.3	1806.2	8.4	1806.2	8.4	0.470601
18MR-01	18MR-01_24	40.2	41.7	12.51	0.16	0.4997	0.0062	12	2642	12	2611	26	2665	18	2665	18	2.02627
18MR-01	18MR-01_25	557	39.4	1.749	0.015	0.17	0.0012	5.6	1026.4	5.6	1012	6.8	1053	12	1053	12	3.89364
18MR-01	18MR-01_26	327	177	0.0799	0.0029	0.01161	0.00015	2.8	77.9	2.8	74.43	0.98	175	75	74.43	0.98	4.45443
18MR-01	18MR-01_27	118.9	65	21.71	0.16	0.6182	0.0051	7.3	3170.1	7.3	3102	20	3215.1	8.9	3215.1	8.9	3.51778
18MR-01	18MR-01_28	135.3	54.4	4.757	0.047	0.313	0.0026	8.2	1776.4	8.2	1755	13	1799	14	1799	14	2.4458
18MR-01	18MR-01_29	657	342	0.0876	0.0021	0.01203	0.00012	2	85.3	2	77.09	0.76	304	55	77.09	0.76	9.62485
18MR-01	18MR-01_30	172	71.6	3.723	0.042	0.258	0.0022	9.2	1575.3	9.2	1479	11	1707	16	1707	16	13.3568	Core
18MR-01	18MR-01_30	623	154	0.0717	0.0044	0.01101	0.00047	4.2	70.2	4.2	70.6	3	70	110	70.6	3	0.569801	Rim
18MR-01	18MR-01_31	82.7	65.1	14.2	0.11	0.5311	0.0036	7.4	2762.5	7.4	2746	15	2775	12	2775	12	1.04505
18MR-01	18MR-01_32	349.6	284	0.0478	0.0019	0.007422	9.7e-05	1.8	47.3	1.8	47.67	0.62	59	74	47.67	0.62	0.782241
18MR-01	18MR-01_33	305	267	0.0828	0.0033	0.01163	0.00017	3	80.6	3	74.5	1.1	254	78	74.5	1.1	7.56824
18MR-01	18MR-01_34	491	179.5	0.477	0.014	0.0552	0.0017	9.5	394.9	9.5	346	10	708	29	346	10	12.3829
18MR-01	18MR-01_35	193.1	105.7	0.0428	0.0022	0.00673	0.00011	2.1	42.4	2.1	43.23	0.73	32	97	43.23	0.73	1.95755
18MR-01	18MR-01_37	452	348.1	17.35	0.18	0.5026	0.0047	10	2952	10	2624	20	3189.4	7	3189.4	7	17.7275
18MR-01	18MR-01_39	226.4	182.7	3.38	0.06	0.2202	0.0041	14	1497	14	1282	22	1825	17	1825	17	29.7534
18MR-01	18MR-01_40	82.4	69.9	24.83	0.23	0.6734	0.0061	9	3300.3	9	3318	24	3292.2	8.7	3292.2	8.7	0.78367
18MR-01	18MR-01_41	197	190	4.694	0.038	0.309	0.0024	7	1766.3	7	1735	12	1807	14	1807	14	3.9845
18MR-01	18MR-01_42	81.9	51.1	0.0139	0.0027	0.001514	8.8e-05	2.7	13.9	2.7	9.75	0.57	160	370	9.75	0.57	29.8561
18MR-01	18MR-01_43	315	56.9	4.306	0.056	0.2954	0.0043	11	1694	11	1667	21	1727	17	1727	17	3.47423
18MR-01	18MR-01_44	307.9	60.3	5.614	0.039	0.3465	0.0026	6	1917.7	6	1917	12	1919	10	1919	10	0.104221
18MR-01	18MR-01_45	36.1	24	5.11	0.1	0.3257	0.0068	17	1833	17	1806	26	1855	37	1855	37	2.64151
18MR-01	18MR-01_46	139.1	101.9	14.67	0.14	0.544	0.0047	9.1	2793.2	9.1	2799	20	2792	10	2792	10	0.250716
18MR-01	18MR-01_47	96.7	89	5.4	0.12	0.3239	0.0035	19	1884	19	1808	17	1964	31	1964	31	7.94297
18MR-01	18MR-01_48	292	82.8	9.761	0.086	0.4399	0.0035	8.2	2411.4	8.2	2350	16	2465	10	2465	10	4.66531
18MR-01	18MR-01_49	429	271	0.0889	0.0026	0.01157	0.00014	2.4	86.4	2.4	74.17	0.91	408	63	74.17	0.91	14.1551
18MR-01	18MR-01_50	138.2	107.5	3.241	0.027	0.2522	0.0016	6.5	1466.2	6.5	1449.5	8.5	1488	16	1488	16	2.58737
18MR-01	18MR-01_52	290.1	207.9	0.0752	0.0026	0.01146	0.00012	2.5	73.5	2.5	73.45	0.79	94	69	73.45	0.79	0.0680272
18MR-01	18MR-01_53	64.3	35.6	6.06	0.11	0.3561	0.0049	16	1983	16	1963	23	2002	27	2002	27	1.94805
18MR-01	18MR-01_54	399	281	20.81	0.17	0.6031	0.0046	7.8	3128.9	7.8	3042	19	3182.7	6.9	3182.7	6.9	4.42077
18MR-01	18MR-01_55	382	289.9	14.19	0.15	0.5273	0.0065	10	2761	10	2729	27	2783	13	2783	13	1.94035
18MR-01	18MR-01_56	63.1	57.7	14.44	0.12	0.5424	0.0045	8.1	2778	8.1	2792	19	2769	11	2769	11	0.830625
18MR-01	18MR-01_57	145.6	107.8	4.06	0.037	0.2913	0.0019	7.5	1645.3	7.5	1647.9	9.6	1633	15	1633	15	0.912431
18MR-01	18MR-01_58	340	178.8	25.63	0.17	0.6943	0.0052	6.3	3332.8	6.3	3401	19	3287.8	6.7	3287.8	6.7	3.44303
18MR-01	18MR-01_59	283.6	278.2	0.0778	0.003	0.01087	0.00017	2.9	76	2.9	69.7	1.1	277	80	69.7	1.1	8.28947
18MR-01	18MR-01_60	368	22.8	0.693	0.017	0.0826	0.0016	9.9	533.4	9.9	511.2	9.5	629	37	511.2	9.5	4.16198
18MR-01	18MR-01_61	284.4	227.2	2.203	0.026	0.2003	0.0018	8.2	1180.8	8.2	1178.1	9.6	1179	19	1179	19	0.0763359
18MR-01	18MR-01_62	822	190	0.1244	0.0032	0.01787	0.00018	2.9	118.9	2.9	114.2	1.1	183	39	114.2	1.1	3.9529
18MR-01	18MR-01_63	178.6	135.6	22.18	0.25	0.5762	0.006	10	3191	10	2932	24	3351	12	3351	12	12.5037
18MR-01	18MR-01_64	154.1	12.8	17.43	0.88	0.494	0.023	48	2934	48	2570	100	3210	13	3210	13	19.9377
18MR-01	18MR-01_65	101.3	45.6	2.231	0.028	0.2022	0.0015	8.8	1189.5	8.8	1186.8	8.1	1184	26	1184	26	0.236486
18MR-01	18MR-01_66	208.8	119.3	0.1891	0.0045	0.02734	0.0003	3.8	175.6	3.8	173.9	1.9	186	52	173.9	1.9	0.968109
18MR-01	18MR-01_67	108.3	29.55	4.802	0.046	0.3118	0.0026	8.1	1784.3	8.1	1749	13	1819	15	1819	15	3.84827
18MR-01	18MR-01_68	86.4	44.5	2.546	0.029	0.2212	0.0016	8.3	1284.2	8.3	1287.9	8.4	1270	21	1270	21	1.40945
18MR-01	18MR-01_69	310	78.9	13.11	0.33	0.5207	0.0082	23	2679	23	2699	35	2661	19	2661	19	1.42803
18MR-01	18MR-01_70	323	71.7	14.65	0.11	0.569	0.0043	7.3	2792	7.3	2903	17	2708.3	7.9	2708.3	7.9	7.18901
18MR-01	18MR-01_71	132.8	323	1.845	0.022	0.1798	0.0017	7.8	1060.5	7.8	1065.9	9.2	1045	24	1045	24	2
18MR-01	18MR-01_72	356	171.8	1.883	0.015	0.1813	0.0011	5.5	1075.5	5.5	1074.1	5.9	1073	16	1073	16	0.102516
18MR-01	18MR-01_73	324	110	17.9	1	0.498	0.027	60	2928	60	2570	120	3239	10	3239	10	20.6545
18MR-01	18MR-01_74	184	72.9	14.01	0.16	0.5332	0.0052	9.8	2752.5	9.8	2754	22	2747	11	2747	11	0.254823
18MR-01	18MR-01_75	224	99.6	11.46	0.14	0.4739	0.0057	12	2559	12	2499	25	2607	10	2607	10	4.14269
18MR-01	18MR-01_77	99.5	111	7.204	0.061	0.3819	0.0027	7.6	2135.9	7.6	2086	13	2188	15	2188	15	4.66179
18MR-01	18MR-01_78	226.6	115.9	11.185	0.074	0.4846	0.003	6.2	2538.1	6.2	2547	13	2533.2	8.8	2533.2	8.8	0.544766
18MR-01	18MR-01_79	129.8	74.8	1.703	0.02	0.1694	0.0013	7.4	1008.7	7.4	1008.5	7.1	1014	25	1014	25	0.542406
18MR-01	18MR-01_80	141.5	141.7	22.72	0.16	0.6383	0.0041	7	3214.2	7	3182	16	3238.6	7.8	3238.6	7.8	1.74767
18MR-01	18MR-01_82	302	199	21.28	0.2	0.6033	0.0046	8.9	3150	8.9	3042	18	3222	10	3222	10	5.58659
18MR-01	18MR-01_83	182.9	81.6	24.68	0.29	0.6678	0.0072	11	3296	11	3296	28	3296	11	3296	11	0
18MR-01	18MR-01_84	262	246	0.099	0.033	0.01277	0.00033	25	92	25	81.8	2.1	10	190	81.8	2.1	11.087	Rim
18MR-01	18MR-01_85	461	57.4	0.5341	0.0075	0.06915	0.00062	4.9	434.3	4.9	431	3.7	446	33	431	3.7	0.759843
18MR-01	18MR-01_86	185.8	66.8	2.012	0.023	0.1863	0.0016	7.6	1118.8	7.6	1100.9	8.5	1153	23	1153	23	4.51865
18MR-01	18MR-01_87	715	334	0.1067	0.002	0.01619	0.00014	1.8	102.9	1.8	103.55	0.91	97	36	103.55	0.91	0.631681
18MR-01	18MR-01_88	397	194.5	0.0913	0.0024	0.01378	0.00013	2.2	88.6	2.2	88.24	0.84	109	56	88.24	0.84	0.406321
18MR-01	18MR-01_89	359.7	152.1	1.581	0.019	0.1619	0.0018	7.5	961.7	7.5	967	10	947	24	947	24	2.11193
18MR-01	18MR-01_90	20.71	13.4	2.356	0.069	0.2057	0.0037	22	1225	22	1208	19	1251	52	1251	52	3.43725
18MR-01	18MR-01_91	526	125.2	1.631	0.028	0.156	0.0026	11	980	11	936	15	1083	22	1083	22	13.5734
18MR-01	18MR-01_92	203	143	0.0777	0.0029	0.01144	0.00015	2.7	75.9	2.7	73.3	0.95	159	76	73.3	0.95	3.42556
18MR-01	18MR-01_93	341.5	108.6	10.48	0.1	0.4569	0.0039	9.2	2476.9	9.2	2425	17	2514	15	2514	15	3.54018
18MR-01	18MR-01_94	315	35.7	4.728	0.037	0.318	0.0021	6.5	1771.6	6.5	1780	10	1759	12	1759	12	1.19386
18MR-01	18MR-01_96	108.2	75.7	13.86	0.15	0.5211	0.0049	11	2740	11	2703	21	2764	15	2764	15	2.20695
18MR-01	18MR-01_98	386	135.2	0.1043	0.0027	0.01579	0.00016	2.5	100.6	2.5	100.98	0.99	111	53	100.98	0.99	0.377734
18MR-01	18MR-01_99	326	203	13.86	0.11	0.5232	0.004	7.4	2740.6	7.4	2712	17	2760	12	2760	12	1.73913
18MR-01	18MR-01_100	27.4	17.6	13.15	0.3	0.518	0.011	22	2687	22	2691	49	2684	19	2684	19	0.260805
18MR-01	18MR-01_101	805	564	0.1183	0.0026	0.01708	0.00015	2.3	113.4	2.3	109.17	0.98	199	42	109.17	0.98	3.73016
18MR-01	18MR-01_102	357	203.7	14.06	0.1	0.5373	0.004	6.9	2753	6.9	2771	17	2740.9	9.5	2740.9	9.5	1.09818
18MR-01	18MR-01_103	193.8	148.6	4.478	0.046	0.3051	0.003	8.6	1725.7	8.6	1716	15	1743	17	1743	17	1.54905
18MR-01	18MR-01_104	67.6	26.7	1.813	0.03	0.173	0.0022	11	1048	11	1028	12	1089	30	1089	30	5.60147
18MR-01	18MR-01_105	121.3	58	1.837	0.03	0.1802	0.0027	11	1058	11	1070	14	1036	35	1036	35	3.28185
18MR-01	18MR-01_107	567	586	20.98	0.28	0.5577	0.0091	13	3136	13	2855	38	3318	21	3318	21	13.9542
18MR-01	18MR-01_108	243.6	131.4	0.0775	0.0027	0.01043	0.00016	2.5	75.7	2.5	66.9	1	346	74	66.9	1	11.6248
18MR-01	18MR-01_109	164	58.1	22.87	0.35	0.6376	0.0077	14	3221	14	3178	30	3246	12	3246	12	2.09489	Core
18MR-01	18MR-01_109	169	8.9	12.73	0.53	0.5144	0.0085	37	2653	37	2675	36	2638	58	2638	58	1.40258	Rim
18MR-01	18MR-01_110	93.7	73	6.441	0.071	0.3763	0.0033	9.8	2036.7	9.8	2059	16	2016	18	2016	18	2.13294
18MR-01	18MR-01_111	410	97.9	9.874	0.076	0.4486	0.0032	7.1	2422.4	7.1	2389	14	2452	10	2452	10	2.56933	Core
18MR-01	18MR-01_111	273	19.5	4.87	0.16	0.3231	0.0068	27	1795	27	1804	33	1786	44	1786	44	1.00784	Rim
18MR-01	18MR-01_112	343	223	0.0458	0.0018	0.00697	0.0001	1.8	45.5	1.8	44.8	0.66	105	80	44.8	0.66	1.53846
18MR-01	18MR-01_113	478	357	14.59	0.23	0.518	0.017	15	2785	15	2679	74	2873	56	2873	56	6.75252
18MR-01	18MR-01_114	330	243	0.1051	0.0029	0.01613	0.00019	2.6	101.3	2.6	103.1	1.2	81	55	103.1	1.2	1.7769
18MR-01	18MR-01_115	58.3	54.6	16.2	0.27	0.5614	0.006	16	2886	16	2871	25	2900	21	2900	21	1
18MR-01	18MR-01_116	169	117.4	14.58	0.12	0.5413	0.0037	7.9	2787.9	7.9	2790	16	2787	11	2787	11	0.107643
18MR-01	18MR-01_117	330	484	0.8748	0.0091	0.10525	0.00088	5	638.3	5	645	5.1	614	21	645	5.1	1.04966
18MR-01	18MR-01_118	555	420.6	0.0332	0.0011	0.005179	6e-05	1.1	33.2	1.1	33.3	0.39	52	67	33.3	0.39	0.301205
18MR-01	18MR-01_119	76.9	71.5	1.682	0.052	0.1514	0.0051	19	996	19	907	29	1215	38	1215	38	25.3498
18MR-01	18MR-01_120	686	184.5	4.682	0.028	0.3055	0.0016	5	1763.6	5	1718.6	7.9	1817.5	8.4	1817.5	8.4	5.44154
18MR-01	18MR-01_121	81.9	61.4	0.0944	0.0054	0.01478	0.0003	5	91.1	5	94.6	1.9	40	110	94.6	1.9	3.84193
18MR-01	18MR-01_122	274	113.7	3.953	0.047	0.2778	0.0033	9.8	1623.2	9.8	1579	17	1685	18	1685	18	6.2908
18MR-01	18MR-01_123	1028	600	0.0755	0.0013	0.011398	9e-05	1.3	73.9	1.3	73.06	0.58	111	39	73.06	0.58	1.13667
18MR-01	18MR-01_124	196.8	87.6	28.35	0.21	0.6944	0.0049	7.4	3430.2	7.4	3398	19	3450.2	8.3	3450.2	8.3	1.51296
18MR-01	18MR-01_125	126.2	37.7	3.052	0.037	0.2453	0.003	9.4	1419.7	9.4	1414	15	1432	21	1432	21	1.25698
18MR-01	18MR-01_126	470	829	18.39	0.19	0.5221	0.006	10	3009	10	2707	26	3219.6	7.2	3219.6	7.2	15.9212
18MR-01	18MR-01_127	208.1	129	13.457	0.098	0.5135	0.0032	6.9	2711.4	6.9	2671	14	2740	10	2740	10	2.51825
18MR-01	18MR-01_128	161.4	95.2	1.685	0.02	0.1677	0.0013	7.6	1001.8	7.6	999.3	7.1	1003	21	1003	21	0.368893
18MR-01	18MR-01_130	120.1	90.1	14.87	0.13	0.5567	0.0052	8.6	2805.7	8.6	2852	21	2770	13	2770	13	2.96029
18MR-01	18MR-01_131	621	223	4.047	0.039	0.2683	0.0026	8.1	1644.2	8.1	1532	13	1787	13	1787	13	14.2697
18MR-01	18MR-01_132	301	179.1	0.4536	0.0084	0.05987	0.00075	5.8	379.2	5.8	374.8	4.6	394	37	374.8	4.6	1.16034
18MR-01	18MR-01_133	2.25	0.3	78	22	0.95	0.25	200	4000	200	3790	640	4356	64	4356	64	12.9936
18MR-01	18MR-01_134	200.3	119.2	0.1673	0.0043	0.02428	0.00034	3.7	156.8	3.7	154.7	2.1	180	54	154.7	2.1	1.33929
18MR-01	18MR-01_135	515	486	0.1707	0.003	0.02433	0.00019	2.6	159.9	2.6	154.9	1.2	226	42	154.9	1.2	3.12695
18MR-01	18MR-01_136	268.1	174.7	0.075	0.0023	0.01135	0.00014	2.2	73.3	2.2	72.75	0.91	98	63	72.75	0.91	0.750341
18MR-01	18MR-01_137	505	417	1.391	0.011	0.14634	0.0008	4.6	884.6	4.6	880.3	4.5	887	15	887	15	0.755355
18MR-01	18MR-01_138	999	680	0.1044	0.002	0.01553	0.00017	1.8	100.8	1.8	99.3	1.1	128	35	99.3	1.1	1.4881
18MR-01	18MR-01_139	102.6	42.6	2.793	0.032	0.236	0.0022	8.6	1352.5	8.6	1365	11	1323	23	1323	23	3.1746
18MR-01	18MR-01_140	40.5	14.6	5.52	0.1	0.3433	0.0054	17	1904	17	1902	26	1897	39	1897	39	0.263574
18MR-01	18MR-01_141	238	167.2	3.834	0.068	0.2743	0.0046	14	1598	14	1562	23	1631	24	1631	24	4.23053	Core
18MR-01	18MR-01_142	548	278	0.0982	0.0024	0.01484	0.00015	2.2	95	2.2	94.94	0.92	92	48	94.94	0.92	0.0631579
18MR-01	18MR-01_143	460	246	0.0952	0.0024	0.01382	0.00019	2.2	92.2	2.2	88.5	1.2	171	50	88.5	1.2	4.01302
18MR-01	18MR-01_144	117.7	36.4	1.699	0.021	0.1681	0.0012	7.9	1007	7.9	1001.8	6.8	998	25	998	25	0.380762
18MR-01	18MR-01_145	472	268	0.1062	0.0027	0.01571	0.00014	2.5	102.4	2.5	100.45	0.9	145	53	100.45	0.9	1.9043
18MR-01	18MR-01_146	324.8	87.1	2.951	0.022	0.2428	0.0016	5.9	1395.3	5.9	1401.3	8.5	1378	12	1378	12	1.69086
18MR-01	18MR-01_147	241	60.3	1.813	0.022	0.1767	0.002	7.8	1049.2	7.8	1049	11	1042	25	1042	25	0.671785
18MR-01	18MR-01_148	233.1	197	12.97	0.11	0.5072	0.0033	7.9	2676.7	7.9	2644	14	2694.3	9.3	2694.3	9.3	1.8669
18MR-01	18MR-01_149	244.5	25.37	2.434	0.042	0.2132	0.0023	12	1250	12	1245	12	1251	18	1251	18	0.479616
18MR-01	18MR-01_150	222.9	52.6	1.633	0.016	0.1638	0.0011	6.3	983.1	6.3	977.9	5.9	986	19	986	19	0.821501
18MR-02	18MR-02_1	596	224	0.0729	0.0022	0.01123	0.00016	2.1	71.4	2.1	72	1	69	57	72	1	0.840336
18MR-02	18MR-02_2	537	491	0.0774	0.0021	0.0113	0.00013	2	75.6	2	72.41	0.85	188	58	72.41	0.85	4.21958
18MR-02	18MR-02_3	706	67.1	11.51	0.14	0.4845	0.0067	12	2565	12	2546	30	2572	19	2572	19	1.01089
18MR-02	18MR-02_4	114.8	87.2	30.09	0.79	0.722	0.012	26	3482	26	3500	45	3471	23	3471	23	0.835494
18MR-02	18MR-02_5	415	140.1	0.0764	0.0025	0.01166	0.00015	2.4	74.7	2.4	74.74	0.98	88	66	74.74	0.98	0.0535475
18MR-02	18MR-02_6	368	237.9	2.008	0.019	0.1909	0.0015	6.4	1117.5	6.4	1126.3	7.9	1096	20	1096	20	2.7646
18MR-02	18MR-02_7	195	241.4	4.288	0.066	0.2958	0.0036	13	1690	13	1670	18	1710	28	1710	28	2.33918	Core
18MR-02	18MR-02_7	376	114	0.0715	0.0082	0.0112	0.001	7.8	70.1	7.8	71.8	6.6	170	210	71.8	6.6	2.42511	Rim
18MR-02	18MR-02_8	398	246	13.75	0.24	0.5287	0.0075	17	2733	17	2734	32	2732	15	2732	15	0.0732064
18MR-02	18MR-02_9	473	258	0.0801	0.0028	0.01181	0.00019	2.7	78.4	2.7	75.7	1.2	146	71	75.7	1.2	3.44388
18MR-02	18MR-02_10	58.2	68	13.78	0.19	0.5241	0.0073	13	2735	13	2714	31	2747	20	2747	20	1.20131
18MR-02	18MR-02_11	424	71.5	27.1	0.28	0.683	0.01	10	3386	10	3359	37	3399	17	3399	17	1.17682
18MR-02	18MR-02_12	263	191.4	0.078	0.004	0.01167	0.00019	3.8	76.1	3.8	74.8	1.2	120	100	74.8	1.2	1.70828
18MR-02	18MR-02_13	110.1	40.3	14.53	0.3	0.5382	0.0095	19	2784	19	2775	40	2784	20	2784	20	0.323276
18MR-02	18MR-02_14	370	414	0.0788	0.0027	0.0119	0.00015	2.5	76.9	2.5	76.25	0.98	94	71	76.25	0.98	0.845254
18MR-02	18MR-02_16	321	183.9	12.41	0.19	0.4868	0.0058	14	2635	14	2556	25	2692	17	2692	17	5.05201	Core
18MR-02	18MR-02_16	404	172.2	0.0771	0.0059	0.01203	0.00031	5.6	75.3	5.6	77.1	2	40	140	77.1	2	2.39044	Rim
18MR-02	18MR-02_17	261.5	227.8	23.91	0.18	0.6452	0.0064	7.5	3264	7.5	3208	25	3290	12	3290	12	2.4924
18MR-02	18MR-02_18	861	708	0.0827	0.003	0.01233	0.00017	2.8	80.6	2.8	79	1.1	118	72	79	1.1	1.98511
18MR-02	18MR-02_19	193	99.7	0.0793	0.0035	0.01185	0.00018	3.3	77.4	3.3	75.9	1.2	119	85	75.9	1.2	1.93798
18MR-02	18MR-02_20	223.3	190	14.37	0.11	0.5283	0.0043	7.5	2773.5	7.5	2734	18	2795	10	2795	10	2.18247
18MR-02	18MR-02_21	366.4	133.4	3.075	0.047	0.2311	0.0038	12	1425	12	1340	20	1538	33	1538	33	12.8739
18MR-02	18MR-02_23	212	168	0.0796	0.0036	0.01219	0.00019	3.4	77.5	3.4	78.1	1.2	69	88	78.1	1.2	0.774194
18MR-02	18MR-02_24	187	125.2	14.45	0.44	0.54	0.014	30	2771	30	2778	61	2763	16	2763	16	0.542888
18MR-02	18MR-02_25	511	301	14.85	0.12	0.5478	0.0054	7.8	2804.9	7.8	2815	22	2790	11	2790	11	0.896057
18MR-02	18MR-02_26	383	319	0.0829	0.0031	0.01191	0.00016	2.9	80.8	2.9	76.3	1	198	76	76.3	1	5.56931
18MR-02	18MR-02_28	87.79	64.1	2.206	0.034	0.2018	0.0019	11	1183	11	1185	10	1165	33	1165	33	1.71674
18MR-02	18MR-02_29	490	44.6	0.107	0.004	0.015	0.00024	3.7	103	3.7	96	1.5	253	84	96	1.5	6.79612
18MR-02	18MR-02_30	273	104	0.556	0.011	0.07025	0.00077	7.4	448.3	7.4	437.6	4.7	487	44	437.6	4.7	2.38679
18MR-02	18MR-02_31	217.1	91.2	10.413	0.083	0.4658	0.0032	7.4	2471.2	7.4	2465	14	2471	12	2471	12	0.242817
18MR-02	18MR-02_32	578	105.8	13.1	0.12	0.4991	0.0038	8.5	2685.8	8.5	2612	16	2735	11	2735	11	4.49726
18MR-02	18MR-02_33	213	69.6	4.845	0.043	0.3295	0.0026	7.4	1792.1	7.4	1836	12	1736	17	1736	17	5.76037
18MR-02	18MR-02_34	333	223	0.0985	0.0032	0.0146	0.00017	2.9	95.2	2.9	93.5	1	137	64	93.5	1	1.78571
18MR-02	18MR-02_35	528	515	0.0557	0.0021	0.00794	0.00012	2	55	2	50.97	0.8	210	79	50.97	0.8	7.32727
18MR-02	18MR-02_36	148.9	136.6	0.0884	0.0051	0.01259	0.00023	4.7	85.7	4.7	80.6	1.5	200	100	80.6	1.5	5.95099
18MR-02	18MR-02_37	132.9	72.2	13.16	0.14	0.5147	0.0049	10	2690	10	2676	21	2694	14	2694	14	0.668151
18MR-02	18MR-02_38	503	347	0.0766	0.0023	0.01162	0.00013	2.1	74.8	2.1	74.5	0.82	92	58	74.5	0.82	0.40107
18MR-02	18MR-02_39	716	350	0.117	0.0033	0.01757	0.00036	3	112.2	3	112.3	2.3	104	42	112.3	2.3	0.0891266
18MR-02	18MR-02_40	178.2	193.3	4.792	0.04	0.3192	0.0021	7	1782.6	7	1786	10	1772	15	1772	15	0.790068
18MR-02	18MR-02_53	219.9	139.8	4.779	0.049	0.3224	0.003	8.8	1781.3	8.8	1801	14	1767	17	1767	17	1.92417
18MR-02	18MR-02_54	89.6	44.72	4.906	0.067	0.3197	0.0041	12	1803	12	1791	21	1823	25	1823	25	1.75535
18MR-02	18MR-02_55	1153	470	0.0678	0.0017	0.01054	0.00019	1.6	66.6	1.6	67.6	1.2	66	48	67.6	1.2	1.5015
18MR-02	18MR-02_56	23.93	15.84	1.738	0.044	0.1712	0.0027	17	1020	17	1018	15	1028	51	1028	51	0.972763
18MR-02	18MR-02_57	404.7	71.2	10.385	0.085	0.4608	0.0036	7.5	2468.7	7.5	2442	16	2488.9	9.1	2488.9	9.1	1.88437
18MR-02	18MR-02_60	428	199	13.97	0.26	0.5336	0.0083	18	2743	18	2754	35	2740	15	2740	15	0.510949
18MR-02	18MR-02_61	930	66	4.74	0.095	0.3086	0.0048	17	1771	17	1737	22	1821	36	1821	36	4.61285
18MR-02	18MR-02_62	135	52.1	1.544	0.035	0.1573	0.0028	14	945	14	941	16	973	38	973	38	3.2888
18MR-02	18MR-02_63	433	50.2	4.614	0.062	0.3184	0.0037	11	1750	11	1781	18	1716	20	1716	20	3.78788
18MR-02	18MR-02_64	232	79.7	0.0808	0.0052	0.01165	0.00024	5.2	79.9	5.2	74.6	1.6	180	120	74.6	1.6	6.63329
18MR-02	18MR-02_65	4080	990	0.0825	0.0015	0.01235	0.00012	1.4	80.5	1.4	79.14	0.75	132	39	79.14	0.75	1.68944
18MR-02	18MR-02_66	1800	343	0.0817	0.0019	0.01151	0.00011	1.8	79.7	1.8	73.74	0.72	258	55	73.74	0.72	7.47804
18MR-02	18MR-02_67	594	234	0.1034	0.0031	0.01525	0.00019	2.9	99.7	2.9	97.5	1.2	165	62	97.5	1.2	2.20662
18MR-02	18MR-02_68	422	290	2.718	0.037	0.2306	0.003	9.7	1333.6	9.7	1337	16	1326	22	1326	22	0.829563
18MR-02	18MR-02_69	520	600	0.082	0.0033	0.01327	0.0002	3.2	80.3	3.2	84.9	1.3	2	77	84.9	1.3	5.72852
18MR-02	18MR-02_70	292	226.9	0.0755	0.0031	0.01141	0.00015	2.9	73.7	2.9	73.15	0.96	113	79	73.15	0.96	0.746269
18MR-02	18MR-02_71	281	308	0.5313	0.0091	0.0699	0.00063	6	432	6	435.5	3.8	406	38	435.5	3.8	0.810185
18MR-02	18MR-02_72	821	505	0.1091	0.0025	0.01643	0.00024	2.3	105	2.3	105	1.5	120	43	105	1.5	0
18MR-02	18MR-02_73	426.5	502	4.624	0.061	0.3077	0.0038	11	1752	11	1729	19	1782	17	1782	17	2.97419
18MR-02	18MR-02_74	322	59.3	4.433	0.051	0.3104	0.0027	9.6	1717.2	9.6	1742	13	1686	19	1686	19	3.32147
18MR-02	18MR-02_75	315.6	59.5	4.664	0.062	0.3047	0.0039	11	1759	11	1714	19	1815	21	1815	21	5.56474
18MR-02	18MR-02_78	519	486	0.0772	0.003	0.01189	0.00018	2.9	75.3	2.9	76.2	1.2	68	74	76.2	1.2	1.19522
18MR-02	18MR-02_79	970	528	0.0819	0.0023	0.01225	0.00015	2.1	79.8	2.1	78.48	0.98	145	60	78.48	0.98	1.65414
18MR-02	18MR-02_80	402.7	371	19.95	0.22	0.5694	0.0069	11	3088	11	2904	28	3210	14	3210	14	9.53271
18MR-02	18MR-02_81	406.2	284	0.0753	0.003	0.0111	0.00024	2.8	73.6	2.8	71.2	1.5	153	73	71.2	1.5	3.26087
18MR-02	18MR-02_82	135.9	72.1	14.6	0.13	0.5367	0.0045	8.3	2788.1	8.3	2769	19	2802	12	2802	12	1.17773
18MR-02	18MR-02_83	241	166	0.0929	0.0038	0.0145	0.00022	3.6	89.9	3.6	92.8	1.4	31	76	92.8	1.4	3.22581
18MR-02	18MR-02_84	554	227	0.0761	0.0041	0.0111	0.00027	3.8	74.3	3.8	71.1	1.7	187	94	71.1	1.7	4.30686
18MR-02	18MR-02_85	384	205	4.871	0.041	0.3202	0.0022	7.1	1796.4	7.1	1790	11	1799	12	1799	12	0.500278
18MR-02	18MR-02_86	970	281	0.0732	0.0029	0.0109	0.0003	2.7	71.6	2.7	69.9	1.9	156	76	69.9	1.9	2.3743
18MR-02	18MR-02_87	396	134.8	9.44	0.22	0.4024	0.0089	22	2375	22	2176	41	2551	25	2551	25	14.7001
18MR-02	18MR-02_88	261	88.4	3.98	0.038	0.2852	0.0021	7.7	1629.3	7.7	1617	11	1637	17	1637	17	1.22175
18MR-02	18MR-02_89	816	372	0.079	0.0023	0.01132	0.00011	2.1	77.1	2.1	72.54	0.71	215	57	72.54	0.71	5.9144
18MR-02	18MR-02_90	453	237.7	9.915	0.086	0.4409	0.0042	8	2425.9	8	2354	19	2483	11	2483	11	5.19533
18MR-02	18MR-02_91	1550	703	0.08	0.002	0.01214	0.00019	1.9	78.1	1.9	77.8	1.2	86	50	77.8	1.2	0.384123
18MR-02	18MR-02_92	151.1	174	0.0847	0.005	0.01243	0.00024	4.7	82.2	4.7	79.6	1.5	140	110	79.6	1.5	3.16302
18MR-02	18MR-02_93	149.1	136.9	3.957	0.05	0.281	0.0031	11	1625	11	1596	16	1658	19	1658	19	3.73945
18MR-02	18MR-02_94	416	476	0.052	0.0024	0.00773	0.00014	2.3	51.4	2.3	49.65	0.89	142	89	49.65	0.89	3.40467
18MR-02	18MR-02_95	256	174	0.1031	0.0041	0.01541	0.00024	3.7	99.4	3.7	98.6	1.5	126	76	98.6	1.5	0.804829
18MR-02	18MR-02_96	488	8.3	0.362	0.0058	0.04928	0.00045	4.4	313.4	4.4	310.1	2.8	322	34	310.1	2.8	1.05297
18MR-02	18MR-02_97	121	63.8	1.548	0.029	0.1592	0.0016	12	947	12	953.6	8.8	916	38	916	38	4.1048
18MR-02	18MR-02_98	148.8	46.9	1.661	0.026	0.1617	0.0019	9.8	992.6	9.8	966	11	1046	30	1046	30	7.64818
18MR-02	18MR-02_99	47.3	144.9	12.87	0.17	0.4965	0.0055	12	2668	12	2597	24	2716	15	2716	15	4.38144
18MR-02	18MR-02_100	302	250	0.0782	0.0034	0.01184	0.00036	3.2	76.3	3.2	75.9	2.3	110	84	75.9	2.3	0.524246
18MR-02	18MR-02_101	79	179.6	13.43	0.14	0.5157	0.0049	9.8	2708.7	9.8	2680	21	2723	13	2723	13	1.57914
18MR-02	18MR-02_102	662	190.3	1.71	0.02	0.1653	0.0016	7.3	1011.5	7.3	985.8	8.9	1048	21	1048	21	5.93511
18MR-02	18MR-02_103	227.6	63.1	4.68	0.04	0.3075	0.0023	7	1763.8	7	1728	11	1795	14	1795	14	3.73259
18MR-02	18MR-02_104	247	226	0.0958	0.0049	0.01254	0.00022	4.6	92.6	4.6	80.3	1.4	360	110	80.3	1.4	13.2829
18MR-02	18MR-02_105	156	51	12.63	0.16	0.4987	0.0064	12	2651	12	2607	28	2675	14	2675	14	2.54206
18MR-02	18MR-02_106	91.9	69	14.16	0.18	0.5401	0.0063	12	2758	12	2782	27	2731	16	2731	16	1.86745
18MR-02	18MR-02_107	386	53.5	8.56	0.13	0.3831	0.0058	14	2289	14	2089	27	2468	20	2468	20	15.3566
18MR-02	18MR-02_108	343	274	0.0766	0.0037	0.01183	0.00021	3.6	75.2	3.6	75.8	1.4	59	89	75.8	1.4	0.797872
18MR-02	18MR-02_109	504	283.4	10.225	0.095	0.4563	0.0045	8.6	2454.1	8.6	2422	20	2471	12	2471	12	1.983
18MR-02	18MR-02_110	2920	1130	0.0782	0.0018	0.01204	0.00014	1.7	76.4	1.7	77.18	0.87	46	44	77.18	0.87	1.02094
18MR-02	18MR-02_112	281	40.6	4.592	0.062	0.3144	0.004	11	1746	11	1761	20	1717	21	1717	21	2.56261
18MR-02	18MR-02_113	229	125	1.496	0.027	0.1458	0.0019	11	927	11	877	11	1039	32	1039	32	15.5919
18MR-02	18MR-02_115	771	225	3.836	0.098	0.2566	0.0056	21	1593	21	1470	29	1752	37	1752	37	16.0959
18MR-02	18MR-02_116	454	122.9	11.08	0.14	0.4408	0.0048	12	2527	12	2356	22	2659	15	2659	15	11.3953
18MR-02	18MR-02_117	301.9	34.7	0.0581	0.0025	0.00886	0.00016	2.4	57.2	2.4	56.8	1	73	79	56.8	1	0.699301
18MR-02	18MR-02_118	673	208.4	4.263	0.033	0.2943	0.0019	6.3	1685.7	6.3	1662.8	9.5	1701	12	1701	12	2.24574
18MR-02	18MR-02_119	345	347	19.93	0.44	0.565	0.013	22	3081	22	2887	53	3207	14	3207	14	9.97817
18MR-02	18MR-02_120	403	338	0.0804	0.0033	0.01131	0.00014	3.1	78.3	3.1	72.49	0.88	249	84	72.49	0.88	7.42018
18MR-02	18MR-02_122	260	174	0.076	0.003	0.01131	0.0002	2.8	74.2	2.8	72.5	1.3	144	79	72.5	1.3	2.29111
18MR-02	18MR-02_124	236	69.5	1.991	0.025	0.1867	0.0021	8.7	1112	8.7	1103	11	1120	23	1120	23	1.51786
18MR-02	18MR-02_125	431	235.8	16.82	0.27	0.49	0.007	15	2922	15	2573	31	3165	14	3165	14	18.7046
18MR-02	18MR-02_126	634	244	0.713	0.011	0.0871	0.0012	6.6	546.6	6.6	537.9	7.1	570	29	537.9	7.1	1.59166
18MR-02	18MR-02_127	228.5	88	4.314	0.095	0.2883	0.0059	18	1694	18	1631	30	1769	18	1769	18	7.80102
18MR-02	18MR-02_128	94.3	10.9	27.51	0.67	0.693	0.014	24	3393	24	3386	52	3395	21	3395	21	0.265096
18MR-02	18MR-02_129	264	223	3.2	0.2	0.237	0.014	56	1432	56	1363	75	1566	31	1566	31	12.963
18MR-02	18MR-02_130	810	396	0.872	0.013	0.0984	0.0014	7.2	636	7.2	605	8.2	733	26	605	8.2	4.87421
18MR-02	18MR-02_131	29.4	9.4	4.53	0.18	0.2783	0.0051	31	1720	31	1581	26	1883	62	1883	62	16.0382
18MR-02	18MR-02_132	264.4	205.3	4.338	0.05	0.3002	0.0035	9.6	1699.2	9.6	1692	17	1701	20	1701	20	0.529101
18MR-02	18MR-02_133	320	254.7	14.613	0.098	0.5426	0.0035	6.4	2789.6	6.4	2794	15	2783.7	8.4	2783.7	8.4	0.370011
18MR-02	18MR-02_134	317	380	0.0829	0.003	0.01229	0.00021	2.8	80.8	2.8	78.8	1.3	144	73	78.8	1.3	2.47525
18MR-02	18MR-02_135	265.6	170.5	13.3	0.16	0.5139	0.0057	11	2700	11	2673	25	2718	15	2718	15	1.65563	Core
18MR-02	18MR-02_136	179	107.6	0.548	0.013	0.07076	0.00089	8.5	442.1	8.5	440.6	5.4	433	51	440.6	5.4	0.33929
18MR-02	18MR-02_137	158.1	55.5	2.524	0.065	0.1887	0.0044	18	1278	18	1113	24	1575	38	1575	38	29.3333
18MR-02	18MR-02_138	92.3	31.4	13.15	0.21	0.5078	0.0084	15	2687	15	2649	37	2724	24	2724	24	2.7533
18MR-02	18MR-02_139	163.3	127.5	0.0763	0.0042	0.01214	0.00028	3.9	74.4	3.9	77.8	1.8	5	96	77.8	1.8	4.56989
18MR-02	18MR-02_140	452	517	0.0789	0.0028	0.01164	0.00014	2.6	77	2.6	74.58	0.88	157	73	74.58	0.88	3.14286
18MR-02	18MR-02_141	204.2	46.7	4.536	0.042	0.3083	0.0024	7.9	1737.5	7.9	1732	12	1744	14	1744	14	0.688073
18MR-02	18MR-02_142	1660	513	0.0812	0.0021	0.01228	0.00015	2	79.2	2	78.69	0.94	117	51	78.69	0.94	0.643939
18MR-02	18MR-02_143	955	404	0.0328	0.001	0.005086	6.4e-05	1	32.8	1	32.71	0.41	69	64	32.71	0.41	0.27439
18MR-02	18MR-02_144	608	586	0.0773	0.002	0.01193	0.00017	1.9	75.5	1.9	76.4	1.1	69	54	76.4	1.1	1.19205
18MR-02	18MR-02_145	66	39.2	4.21	0.11	0.2629	0.0074	22	1670	22	1502	38	1890	43	1890	43	20.5291
18MR-02	18MR-02_146	88.4	98.1	9.03	0.67	0.352	0.025	77	2279	77	1920	120	2696	20	2696	20	28.7834
18MR-02	18MR-02_147	1847	724	0.0756	0.0015	0.01129	0.00012	1.4	74	1.4	72.38	0.74	133	41	72.38	0.74	2.18919
18MR-02	18MR-02_148	366	387.6	0.0736	0.0026	0.01132	0.00015	2.5	72	2.5	72.54	0.97	74	68	72.54	0.97	0.75
18MR-02	18MR-02_149	344	91.5	15.67	0.27	0.5447	0.0049	16	2853	16	2802	20	2895	21	2895	21	3.21244
18MR-02	18MR-02_150	177.1	108	5.182	0.056	0.3305	0.0033	9.7	1850.5	9.7	1840	16	1869	19	1869	19	1.55163
18MR-02	18MR-02_151	189.3	176.8	3.158	0.026	0.2463	0.0019	6.4	1446.3	6.4	1419	10	1493	16	1493	16	4.95646
18MR-02	18MR-02_152	504	579	0.0811	0.0025	0.0121	0.00016	2.3	79.1	2.3	77.5	1	144	62	77.5	1	2.02276
18MR-02	18MR-02_153	2860	902	0.09	0.0056	0.01245	0.00012	4.3	85.9	4.3	79.75	0.74	224	82	79.75	0.74	7.15949
18MR-02	18MR-02_155	744	44.5	3.985	0.058	0.2733	0.0039	12	1631	12	1557	20	1740	18	1740	18	10.5172
18MR-02	18MR-02_156	300	85.1	4.61	0.036	0.3141	0.002	6.4	1751.1	6.4	1760.7	9.8	1731	12	1731	12	1.71577
18MR-02	18MR-02_157	245.6	259.2	0.439	0.01	0.0587	0.00072	7.3	368.3	7.3	367.7	4.4	352	47	367.7	4.4	0.162911
18MR-02	18MR-02_158	491	64.7	13.88	0.1	0.5373	0.0038	7	2741.1	7	2772	16	2710	10	2710	10	2.28782
18MR-02	18MR-02_159	189	74.5	6.052	0.077	0.3563	0.0045	11	1982	11	1964	21	1994	19	1994	19	1.50451
18MR-02	18MR-02_160	657	522.4	29.99	0.48	0.568	0.03	16	3483	16	2890	120	3851	79	3851	79	24.9546
18MR-02	18MR-02_162	227	305	0.492	0.0085	0.0644	0.00057	5.8	405.7	5.8	402.3	3.4	402	41	402.3	3.4	0.838058
18MR-02	18MR-02_163	64.7	28.4	1.783	0.034	0.1734	0.0022	12	1036	12	1030	12	1023	37	1023	37	0.684262
18MR-02	18MR-02_165	82	84.3	0.091	0.011	0.01168	0.00035	10	88	10	74.9	2.2	340	210	74.9	2.2	14.8864
18MR-02	18MR-02_166	22.24	17.73	13.61	0.22	0.526	0.0076	15	2719	15	2722	32	2710	21	2710	21	0.442804
18MR-02	18MR-02_168	261	174.1	23.14	0.18	0.6294	0.0054	7.8	3232	7.8	3146	21	3278	10	3278	10	4.02685
18MR-02	18MR-02_170	517	45	0.0628	0.0048	0.00938	0.00033	4.5	61.8	4.5	60.2	2.1	120	140	60.2	2.1	2.589	Rim
18MR-02	18MR-02_171	338	322	0.0865	0.003	0.01209	0.00015	2.8	84.1	2.8	77.44	0.96	265	73	77.44	0.96	7.91914
18MR-02	18MR-02_172	337	175	2.155	0.022	0.2012	0.0019	7.2	1165.7	7.2	1181	10	1127	20	1127	20	4.79148
18MR-02	18MR-02_173	848	341.6	3.788	0.052	0.2365	0.0026	11	1591	11	1368	13	1890	20	1890	20	27.619
18MR-02	18MR-02_174	348	82.7	0.0803	0.0049	0.01161	0.00055	4.6	78.1	4.6	74.4	3.5	180	110	74.4	3.5	4.73752
18MR-02	18MR-02_175	220	224	0.1018	0.0073	0.01372	0.00036	6.6	98	6.6	87.9	2.3	310	140	87.9	2.3	10.3061
18MR-02	18MR-02_176	185	112.7	2.829	0.052	0.2253	0.0039	14	1361	14	1309	21	1429	31	1429	31	8.39748
18MR-02	18MR-02_177	164	177	0.0863	0.0043	0.01209	0.00023	4	83.7	4	77.5	1.5	226	94	77.5	1.5	7.40741
18MR-02	18MR-02_178	629	600	0.0739	0.002	0.01117	0.00013	1.9	72.3	1.9	71.58	0.8	101	56	71.58	0.8	0.995851
18MR-02	18MR-02_179	163.4	92.7	4.35	0.14	0.2912	0.0095	28	1697	28	1656	51	1745	58	1745	58	5.10029
18MR-02	18MR-02_180	540	121.8	0.0786	0.0027	0.0121	0.0002	2.5	76.7	2.5	77.5	1.3	71	63	77.5	1.3	1.04302
18MR-02	18MR-02_181	286.9	68.9	10.15	0.073	0.4599	0.0029	6.7	2447.8	6.7	2439	13	2448.7	9.3	2448.7	9.3	0.396129
18MR-02	18MR-02_182	580	319	0.074	0.0019	0.01128	0.00011	1.7	72.5	1.7	72.32	0.69	83	52	72.32	0.69	0.248276
18MR-02	18MR-02_183	616	342.3	0.0733	0.0019	0.01114	0.00014	1.8	71.8	1.8	71.4	0.88	107	56	71.4	0.88	0.557103
18MR-02	18MR-02_184	315.6	324	15.07	0.42	0.559	0.016	28	2812	28	2858	65	2782	13	2782	13	2.73185
18MR-02	18MR-02_185	1198	319.7	0.02695	0.00094	0.003933	8.5e-05	0.93	26.98	0.93	25.3	0.54	187	67	25.3	0.54	6.22683
18MR-02	18MR-02_188	503	132.6	8.56	0.33	0.39	0.014	39	2272	39	2110	68	2440	12	2440	12	13.5246
18MR-02	18MR-02_190	363	244.6	4.968	0.061	0.3237	0.0042	11	1814	11	1807	20	1822	18	1822	18	0.823271
18MR-02	18MR-02_191	900	449	0.0836	0.0025	0.01258	0.00019	2.3	81.5	2.3	80.6	1.2	108	57	80.6	1.2	1.10429
18MR-02	18MR-02_192	124.8	94.5	4.284	0.077	0.2854	0.005	15	1687	15	1617	25	1767	34	1767	34	8.48896
18MR-02	18MR-02_193	141.5	89.2	23.58	0.4	0.666	0.0072	17	3252	17	3288	28	3231	18	3231	18	1.76416
18MR-02	18MR-02_194	543	151	4.74	0.1	0.3134	0.0067	18	1771	18	1756	33	1807	33	1807	33	2.82236
18MR-02	18MR-02_195	1760	943	0.0757	0.0015	0.011432	9e-05	1.4	74.1	1.4	73.27	0.58	113	42	73.27	0.58	1.12011
18MR-02	18MR-02_196	172.5	152.7	0.0775	0.0037	0.01122	0.00023	3.5	75.5	3.5	71.9	1.5	197	94	71.9	1.5	4.76821
18MR-02	18MR-02_197	177	53.5	21.08	0.7	0.578	0.015	34	3128	34	2932	61	3268	26	3268	26	10.2815
18MR-02	18MR-02_199	180.5	108.8	0.485	0.011	0.0623	0.001	7.3	400.6	7.3	389.7	6.3	469	54	389.7	6.3	2.72092
18MR-02	18MR-02_200	747	425	0.0971	0.0026	0.01423	0.00027	2.4	94	2.4	91.1	1.7	151	52	91.1	1.7	3.08511
18MR-02	18MR-02_201	433	176.5	9.779	0.085	0.4471	0.0034	8	2413.3	8	2382	15	2442	11	2442	11	2.457
18MR-02	18MR-02_202	215.6	154.4	0.0896	0.0048	0.01204	0.00031	4.6	87.5	4.6	77.1	2	320	100	77.1	2	11.8857
18MR-02	18MR-02_203	444	77.7	4.28	0.05	0.2924	0.0032	9.5	1687.8	9.5	1653	16	1735	18	1735	18	4.72622
18MR-02	18MR-02_204	512	274.8	0.0758	0.0025	0.01168	0.00018	2.4	74	2.4	74.8	1.1	79	62	74.8	1.1	1.08108
18MR-02	18MR-02_205	710	207	0.0801	0.0024	0.01181	0.00016	2.3	78.2	2.3	75.7	1	161	62	75.7	1	3.19693
18MR-02	18MR-02_206	361	50.3	4.919	0.046	0.3221	0.0028	7.8	1806.4	7.8	1799	14	1816	16	1816	16	0.936123
18MR-02	18MR-02_207	409	343	0.0804	0.0031	0.01222	0.00015	2.8	78.7	2.8	78.32	0.92	106	75	78.32	0.92	0.482846
18MR-03	18MR-03_1	623	269	0.0711	0.0022	0.01105	0.00016	2.1	69.7	2.1	70.87	0.99	42	63	70.87	0.99	1.67862
18MR-03	18MR-03_2	107.4	80.5	3.812	0.072	0.2777	0.0041	15	1593	15	1579	21	1604	31	1604	31	1.5586	Core
18MR-03	18MR-03_2	1000	15.5	0.0656	0.008	0.0103	0.001	7.7	64.3	7.7	66	6.7	30	210	66	6.7	2.64386	Rim
18MR-03	18MR-03_3	331	248	0.0798	0.0037	0.01181	0.00022	3.6	78.2	3.6	75.7	1.4	155	92	75.7	1.4	3.19693
18MR-03	18MR-03_4	597	258.3	0.0998	0.0029	0.0152	0.00021	2.7	96.5	2.7	97.3	1.3	90	59	97.3	1.3	0.829016
18MR-03	18MR-03_5	670	1110	0.0817	0.0038	0.01174	0.00025	3.6	79.5	3.6	75.3	1.6	211	99	75.3	1.6	5.28302
18MR-03	18MR-03_6	404	146.6	3.066	0.04	0.2435	0.0029	10	1423	10	1404	15	1443	18	1443	18	2.7027
18MR-03	18MR-03_7	336.7	221.4	4.418	0.044	0.3043	0.0025	8.3	1714.4	8.3	1712	12	1712	16	1712	16	0
18MR-03	18MR-03_8	392.8	48.8	5.01	0.045	0.3271	0.0029	7.6	1820	7.6	1824	14	1811	14	1811	14	0.717835
18MR-03	18MR-03_10	264	143.9	5.317	0.086	0.3373	0.0054	14	1870	14	1873	26	1867	24	1867	24	0.321371
18MR-03	18MR-03_12	75.6	34.9	23.31	0.32	0.6685	0.0083	14	3240	14	3298	32	3197	17	3197	17	3.15921
18MR-03	18MR-03_13	919	92.5	9.89	0.22	0.429	0.013	21	2421	21	2296	58	2538	42	2538	42	9.53507
18MR-03	18MR-03_14	952	456.9	0.912	0.019	0.1047	0.002	9.9	656.5	9.9	642	12	691	36	642	12	2.20868
18MR-03	18MR-03_15	271	67.3	4.374	0.082	0.294	0.0052	15	1705	15	1666	24	1738	23	1738	23	4.14269	Core
18MR-03	18MR-03_15	143.7	62.3	0.0742	0.0093	0.01079	0.00066	8.8	72.4	8.8	69.2	4.2	180	260	69.2	4.2	4.41989	Rim
18MR-03	18MR-03_16	412	225	0.05	0.0023	0.00779	0.00014	2.2	49.7	2.2	50.01	0.92	73	91	50.01	0.92	0.623742
18MR-03	18MR-03_17	520	395.7	4.241	0.047	0.2917	0.0035	9.1	1680.8	9.1	1649	18	1719	15	1719	15	4.07213
18MR-03	18MR-03_18	415	245	11.77	0.28	0.46	0.01	24	2580	24	2436	47	2697	19	2697	19	9.67742
18MR-03	18MR-03_19	242	125.4	0.1021	0.0044	0.01414	0.00029	4.1	98.4	4.1	90.5	1.8	286	87	90.5	1.8	8.02846
18MR-03	18MR-03_20	738	738	14.96	0.22	0.554	0.01	15	2813	15	2841	43	2788	24	2788	24	1.901
18MR-03	18MR-03_21	65.8	24.77	4.676	0.065	0.3123	0.0037	12	1760	12	1751	18	1773	25	1773	25	1.24083
18MR-03	18MR-03_23	74.9	57.76	15.66	0.23	0.5742	0.0073	14	2856	14	2923	30	2803	21	2803	21	4.28113
18MR-03	18MR-03_24	471	8.8	0.535	0.032	0.0664	0.0041	21	432	21	414	25	520	100	414	25	4.16667
18MR-03	18MR-03_25	169	171	3.309	0.059	0.2607	0.005	13	1482	13	1495	25	1465	26	1465	26	2.04778
18MR-03	18MR-03_26	354	367	0.0793	0.003	0.01221	0.00019	2.8	77.4	2.8	78.2	1.2	80	73	78.2	1.2	1.03359
18MR-03	18MR-03_27	429	428	19.77	0.28	0.5694	0.0078	14	3077	14	2903	32	3187	12	3187	12	8.9112
18MR-03	18MR-03_28	491	34.5	4.94	0.2	0.327	0.013	33	1804	33	1820	63	1790	57	1790	57	1.67598
18MR-03	18MR-03_30	367	146	4.96	0.13	0.3277	0.0087	22	1811	22	1826	42	1793	37	1793	37	1.84049	Core
18MR-03	18MR-03_30	698	256	0.0763	0.0044	0.01176	0.00032	4.2	74.6	4.2	75.4	2	90	110	75.4	2	1.07239	Rim
18MR-03	18MR-03_31	634.1	339.4	0.0895	0.0032	0.01243	0.00013	3	86.9	3	79.64	0.84	280	70	79.64	0.84	8.35443
18MR-03	18MR-03_32	363	113.7	25.13	0.45	0.597	0.01	17	3308	17	3012	40	3497	17	3497	17	13.869
18MR-03	18MR-03_33	2230	2150	0.0514	0.0013	0.00763	0.00011	1.2	50.8	1.2	49	0.7	142	49	49	0.7	3.54331
18MR-03	18MR-03_34	326	364	0.0752	0.0031	0.01133	0.00022	2.9	73.4	2.9	72.6	1.4	112	81	72.6	1.4	1.08992
18MR-03	18MR-03_35	238	139.9	0.0804	0.0037	0.01214	0.00023	3.5	78.3	3.5	77.8	1.5	117	88	77.8	1.5	0.63857
18MR-03	18MR-03_36	124.8	71.9	3.827	0.084	0.2837	0.0043	18	1594	18	1609	22	1578	28	1578	28	1.96451
18MR-03	18MR-03_37	52	26.2	2.489	0.06	0.2142	0.0032	17	1265	17	1251	17	1288	44	1288	44	2.87267
18MR-03	18MR-03_38	268	40.1	15.55	0.38	0.449	0.012	23	2846	23	2387	51	3194	17	3194	17	25.2661
18MR-03	18MR-03_39	530	387	0.0801	0.0034	0.01179	0.00032	3.2	78.1	3.2	75.5	2	168	81	75.5	2	3.32907
18MR-03	18MR-03_40	295	85.2	3.153	0.039	0.2548	0.0026	9.6	1444.5	9.6	1463	13	1417	22	1417	22	3.24629
18MR-03	18MR-03_42	414	123.9	0.0547	0.0024	0.0082	0.00019	2.3	54	2.3	52.6	1.2	119	83	52.6	1.2	2.59259
18MR-03	18MR-03_43	1350	730	0.1074	0.0033	0.0163	0.00028	3	103.5	3	104.2	1.8	98	62	104.2	1.8	0.676329
18MR-03	18MR-03_44	260	296	13.8	0.2	0.5207	0.0075	14	2736	14	2700	32	2760	14	2760	14	2.17391
18MR-03	18MR-03_45	372	220	0.0799	0.003	0.01205	0.00018	2.8	77.9	2.8	77.2	1.2	117	73	77.2	1.2	0.898588
18MR-03	18MR-03_46	282	155.2	0.076	0.0036	0.01148	0.00024	3.4	74.2	3.4	73.6	1.5	111	91	73.6	1.5	0.808625
18MR-03	18MR-03_47	412	155.7	1.751	0.021	0.1713	0.0015	7.6	1026.5	7.6	1019.3	8.1	1043	19	1043	19	2.27229
18MR-03	18MR-03_48	514	126.1	22.21	0.31	0.6268	0.0094	14	3190	14	3133	37	3219	14	3219	14	2.67164
18MR-03	18MR-03_49	733	312.6	0.0426	0.0014	0.006321	8.9e-05	1.4	42.4	1.4	40.62	0.57	141	64	40.62	0.57	4.19811
18MR-03	18MR-03_50	618	613	0.0769	0.0027	0.01163	0.00019	2.5	75.1	2.5	74.5	1.2	108	66	74.5	1.2	0.798935
18MR-03	18MR-03_51	174.3	109.5	0.049	0.003	0.0074	0.00018	2.9	48.4	2.9	47.5	1.2	120	120	47.5	1.2	1.8595
18MR-03	18MR-03_52	171.9	140.6	1.058	0.018	0.1186	0.0015	8.8	731.5	8.8	722.2	8.6	761	33	722.2	8.6	1.27136
18MR-03	18MR-03_53	156.9	70.1	2.063	0.027	0.1939	0.0019	9	1135.4	9	1142	10	1119	27	1119	27	2.05541
18MR-03	18MR-03_54	253	232	5.105	0.059	0.3309	0.0034	9.9	1835.3	9.9	1842	17	1829	18	1829	18	0.710771
18MR-03	18MR-03_55	361	157.7	10.26	0.12	0.4711	0.0053	11	2457	11	2487	23	2439	15	2439	15	1.96802
18MR-03	18MR-03_56	85.5	50.7	4.485	0.063	0.3086	0.0035	12	1727	12	1733	17	1721	22	1721	22	0.697269
18MR-03	18MR-03_57	197	160	0.0807	0.0038	0.01182	0.00021	3.6	78.5	3.6	75.8	1.3	180	100	75.8	1.3	3.43949
18MR-03	18MR-03_58	283	37.5	8.97	0.2	0.375	0.0084	20	2330	20	2050	39	2584	22	2584	22	20.6656
18MR-03	18MR-03_59	502	387	0.0765	0.0025	0.0116	0.00022	2.4	74.7	2.4	74.4	1.4	111	66	74.4	1.4	0.401606
18MR-03	18MR-03_60	273	141.2	4.341	0.081	0.2977	0.0058	16	1696	16	1689	28	1717	27	1717	27	1.63075
18MR-03	18MR-03_61	419	383	3.677	0.049	0.2728	0.0035	11	1564	11	1554	18	1572	21	1572	21	1.14504
18MR-03	18MR-03_62	56.8	65.5	2.128	0.05	0.1998	0.0037	16	1153	16	1173	20	1115	48	1115	48	5.20179
18MR-03	18MR-03_63	95.9	149.3	0.0907	0.0092	0.01186	0.00036	8.4	87.3	8.4	76	2.3	400	200	76	2.3	12.9439
18MR-03	18MR-03_64	434.7	365	3.92	0.12	0.249	0.0069	24	1614	24	1432	36	1869	26	1869	26	23.3815
18MR-03	18MR-03_65	119.4	85.7	0.0128	0.0021	0.00232	0.0001	2.2	13.2	2.2	14.94	0.66	-220	240	14.94	0.66	13.1818
18MR-03	18MR-03_66	408	354	0.0769	0.0026	0.01155	0.00016	2.5	75.1	2.5	74	1	132	70	74	1	1.46471
18MR-03	18MR-03_67	395	123.7	4.61	0.1	0.3119	0.0071	19	1748	19	1747	35	1752	35	1752	35	0.285388
18MR-03	18MR-03_68	223	63.7	12.85	0.18	0.5118	0.0078	14	2666	14	2662	33	2676	18	2676	18	0.523169
18MR-03	18MR-03_69	173.4	61.3	3.784	0.079	0.2623	0.0055	17	1587	17	1501	28	1707	27	1707	27	12.068	Core
18MR-03	18MR-03_69	130	83.9	0.084	0.044	0.0123	0.0012	42	81	42	78.7	7.4	100	990	78.7	7.4	2.83951	Rim
18MR-03	18MR-03_70	114.9	86.7	14.97	0.16	0.56	0.0067	9.7	2812.2	9.7	2865	28	2775	16	2775	16	3.24324
18MR-03	18MR-03_71	160.3	94.4	0.542	0.013	0.0708	0.0012	8.4	438.7	8.4	440.6	7.4	423	52	440.6	7.4	0.433098
18MR-03	18MR-03_72	395	284	4.661	0.08	0.3135	0.0048	14	1758	14	1757	23	1757	27	1757	27	0
18MR-03	18MR-03_73	432.8	157.5	3.468	0.072	0.2415	0.0047	17	1519	17	1393	24	1698	29	1698	29	17.9623
18MR-03	18MR-03_74	134	131.3	4.109	0.063	0.2916	0.0048	13	1654	13	1648	24	1670	23	1670	23	1.31737
18MR-03	18MR-03_75	523	207	8.67	0.26	0.3479	0.0088	27	2302	27	1922	43	2654	29	2654	29	27.581	Core
18MR-03	18MR-03_76	94.4	65	1.093	0.031	0.1047	0.0017	16	747	16	641.5	9.8	1063	67	641.5	9.8	14.1232
18MR-03	18MR-03_77	336	88.4	25.2	0.3	0.6929	0.0087	12	3313	12	3391	33	3275	13	3275	13	3.54198
18MR-03	18MR-03_78	363	400	0.2899	0.0064	0.04076	0.00045	5	258	5	257.5	2.8	259	47	257.5	2.8	0.193798
18MR-03	18MR-03_79	249	177	0.786	0.015	0.0952	0.0011	8.6	587.7	8.6	586.2	6.6	590	37	586.2	6.6	0.255232
18MR-03	18MR-03_82	91.8	29.95	5.031	0.071	0.3238	0.0036	12	1824	12	1808	17	1842	23	1842	23	1.84582
18MR-03	18MR-03_84	422	406	0.0797	0.003	0.01185	0.00019	2.8	77.7	2.8	75.9	1.2	128	73	75.9	1.2	2.3166
18MR-03	18MR-03_85	123.6	157	0.0828	0.0069	0.01186	0.00032	6.4	80.4	6.4	76	2	210	160	76	2	5.47264
18MR-03	18MR-03_86	57.2	52.2	0.548	0.026	0.0686	0.0015	16	439	16	427.7	8.9	490	100	427.7	8.9	2.57403
18MR-03	18MR-03_87	967	136.3	4.375	0.062	0.3014	0.004	12	1706	12	1697	20	1720	20	1720	20	1.33721
18MR-03	18MR-03_88	76.6	65.6	13.84	0.26	0.5349	0.0094	18	2732	18	2758	40	2720	23	2720	23	1.39706
18MR-03	18MR-03_89	275	242	4.148	0.057	0.2929	0.0036	11	1662	11	1655	18	1670	20	1670	20	0.898204
18MR-03	18MR-03_91	651	128	0.0768	0.0027	0.01168	0.00017	2.5	75	2.5	74.9	1.1	96	68	74.9	1.1	0.133333
18MR-03	18MR-03_92	127.7	66.8	24.25	0.45	0.663	0.012	18	3276	18	3272	48	3280	19	3280	19	0.243902
18MR-03	18MR-03_93	990	656	0.1041	0.0022	0.0155	0.00021	2	100.5	2	99.1	1.3	140	47	99.1	1.3	1.39303
18MR-03	18MR-03_94	92	49.34	3.136	0.073	0.2482	0.0064	18	1438	18	1427	33	1450	51	1450	51	1.58621
18MR-03	18MR-03_95	142.7	86.2	22.31	0.57	0.627	0.016	25	3190	25	3141	60	3228	28	3228	28	2.69517
18MR-03	18MR-03_96	454	180	0.0997	0.0035	0.01509	0.00028	3.2	96.3	3.2	96.5	1.7	106	69	96.5	1.7	0.207684
18MR-03	18MR-03_97	304	186	25.91	0.43	0.677	0.012	17	3339	17	3326	48	3358	16	3358	16	0.952948
18MR-03	18MR-03_98	290	162	17.6	0.64	0.486	0.017	39	2947	39	2540	76	3257	14	3257	14	22.0141
18MR-03	18MR-03_99	262	490	19.92	0.52	0.593	0.013	25	3081	25	2996	51	3141	20	3141	20	4.61636
18MR-03	18MR-03_100	350	111.6	13.44	0.16	0.5157	0.0054	11	2711	11	2680	23	2727	14	2727	14	1.72351
18MR-03	18MR-03_101	221	267	0.0779	0.0044	0.0121	0.00027	4.2	75.9	4.2	77.5	1.7	80	100	77.5	1.7	2.10804
18MR-03	18MR-03_102	411	125.9	0.5149	0.0093	0.06856	0.00088	6.2	421	6.2	427.4	5.3	384	39	427.4	5.3	1.52019
18MR-03	18MR-03_103	380	124.3	1.907	0.024	0.1844	0.002	8.3	1082.3	8.3	1092	11	1062	23	1062	23	2.82486
18MR-03	18MR-03_104	179.7	149.9	14.16	0.18	0.5286	0.0077	12	2759	12	2734	32	2780	18	2780	18	1.65468
18MR-03	18MR-03_105	143	177	12.21	0.15	0.4922	0.0056	11	2619	11	2579	24	2660	18	2660	18	3.04511
18MR-03	18MR-03_106	84.8	74.2	12.11	0.19	0.4933	0.0077	15	2611	15	2586	32	2640	22	2640	22	2.04545
18MR-03	18MR-03_107	1128	896	0.1069	0.0032	0.01539	0.00024	2.9	103	2.9	98.4	1.5	227	56	98.4	1.5	4.46602
18MR-03	18MR-03_108	118.3	132.3	13.85	0.15	0.5365	0.0067	11	2738	11	2767	28	2719	17	2719	17	1.76535
18MR-03	18MR-03_109	236	266	3.255	0.063	0.2384	0.0048	14	1471	14	1377	25	1612	26	1612	26	14.5782
18MR-03	18MR-03_110	189	127.9	0.0774	0.0041	0.01156	0.00022	3.8	75.4	3.8	74.1	1.4	120	99	74.1	1.4	1.72414
18MR-03	18MR-03_111	316	201	10.27	0.22	0.466	0.011	20	2457	20	2462	50	2458	36	2458	36	0.162734
18MR-03	18MR-03_113	148	54.6	2.129	0.037	0.1984	0.0027	12	1156	12	1166	14	1130	31	1130	31	3.18584
18MR-03	18MR-03_114	176.1	2.47	11.47	0.15	0.4916	0.0066	12	2559	12	2575	28	2551	22	2551	22	0.940808
18MR-03	18MR-03_115	536	291	0.0969	0.0029	0.0145	0.00023	2.7	93.8	2.7	92.8	1.4	130	56	92.8	1.4	1.0661
18MR-03	18MR-03_116	192.8	100.2	0.526	0.013	0.06198	0.00097	8.5	428	8.5	387.6	5.9	650	53	387.6	5.9	9.43925
18MR-03	18MR-03_117	457	348	0.0793	0.0036	0.01208	0.00024	3.4	77.2	3.4	77.4	1.5	93	82	77.4	1.5	0.259067
18MR-03	18MR-03_118	860	244	0.0762	0.0055	0.01122	0.00037	5.2	74.4	5.2	71.9	2.4	130	130	71.9	2.4	3.36022
18MR-03	18MR-03_119	100	43.48	1.931	0.042	0.1793	0.003	14	1089	14	1062	16	1149	42	1149	42	7.5718
18MR-03	18MR-03_120	310.3	214	3.201	0.042	0.2434	0.0027	10	1456	10	1404	14	1530	23	1530	23	8.23529
18MR-03	18MR-03_121	452	393	3.177	0.065	0.2476	0.0047	16	1448	16	1429	25	1488	28	1488	28	3.96505
18MR-03	18MR-03_122	325	166.1	0.462	0.01	0.06054	0.00097	7	385.2	7	378.8	5.9	397	47	378.8	5.9	1.66147
18MR-03	18MR-03_123	154.2	174	0.0799	0.0046	0.01179	0.00024	4.3	77.7	4.3	75.6	1.5	150	110	75.6	1.5	2.7027
18MR-03	18MR-03_124	285	240.4	23.78	0.3	0.6596	0.0085	12	3258	12	3263	33	3254	15	3254	15	0.276583
18MR-03	18MR-03_125	250.6	192.6	19.91	0.25	0.5801	0.007	12	3084	12	2947	29	3176	12	3176	12	7.21033
18MR-03	18MR-03_126	277	211	12.65	0.25	0.4969	0.0086	18	2650	18	2608	34	2696	20	2696	20	3.26409
18MR-03	18MR-03_127	108	97.2	3.198	0.065	0.251	0.0046	15	1452	15	1442	23	1470	30	1470	30	1.90476
18MR-03	18MR-03_128	353.1	250.8	0.4139	0.0088	0.05518	0.00081	6.3	351	6.3	346.2	5	378	42	346.2	5	1.36752
18MR-03	18MR-03_131	1330	137	0.0959	0.0026	0.01408	0.00017	2.4	92.9	2.4	90.2	1.1	165	53	90.2	1.1	2.90635
18MR-03	18MR-03_132	241.4	125.9	14.08	0.24	0.5376	0.0087	16	2755	16	2771	37	2742	21	2742	21	1.05762
18MR-03	18MR-03_133	161	261	20.47	0.19	0.6058	0.0062	9.1	3112.8	9.1	3052	25	3154	11	3154	11	3.23399
18MR-03	18MR-03_134	998	243	0.0742	0.0041	0.01116	0.00038	3.9	72.6	3.9	71.5	2.4	120	100	71.5	2.4	1.51515
18MR-03	18MR-03_135	226.2	184.9	0.891	0.018	0.1006	0.0016	9.6	645.4	9.6	617.8	9.3	755	45	617.8	9.3	4.27642
18MR-03	18MR-03_136	268	148	0.0739	0.0057	0.01145	0.00028	5.3	71.9	5.3	73.4	1.8	50	130	73.4	1.8	2.08623
18MR-03	18MR-03_137	434	350	0.0108	0.001	0.001514	3.9e-05	1	10.9	1	9.75	0.25	170	170	9.75	0.25	10.5505
18MR-03	18MR-03_138	139.8	74.9	3.253	0.045	0.2564	0.0032	11	1469	11	1471	17	1471	24	1471	24	0
18MR-03	18MR-03_139	529	61.3	20.79	0.38	0.609	0.011	18	3124	18	3062	44	3173	16	3173	16	3.49827
18MR-03	18MR-03_140	330	237.7	11.04	0.18	0.4728	0.0062	15	2522	15	2494	27	2549	17	2549	17	2.15771
18MR-03	18MR-03_141	69.5	63.7	13.14	0.33	0.509	0.012	23	2686	23	2654	55	2718	31	2718	31	2.35467
18MR-03	18MR-03_143	277	162	0.1003	0.0043	0.01483	0.00026	3.9	96.7	3.9	94.9	1.7	140	78	94.9	1.7	1.86143
18MR-03	18MR-03_144	413	132.8	9.46	0.19	0.4067	0.0066	19	2380	19	2198	30	2538	18	2538	18	13.3964
18MR-03	18MR-03_145	548	293	0.5587	0.0077	0.07311	0.00076	5	450.2	5	454.8	4.6	425	32	454.8	4.6	1.02177
18MR-03	18MR-03_147	335	184	4.817	0.058	0.3306	0.0041	10	1787	10	1840	20	1728	17	1728	17	6.48148
18MR-03	18MR-03_148	423	469	0.0822	0.0028	0.01229	0.00019	2.6	80.1	2.6	78.7	1.2	136	71	78.7	1.2	1.74782
18MR-03	18MR-03_149	1270	232	0.085	0.0035	0.01265	0.00021	3.3	82.7	3.3	81	1.3	132	80	81	1.3	2.05562
18MR-03	18MR-03_150	155.7	77.8	4.346	0.066	0.3039	0.0035	12	1701	12	1710	17	1690	24	1690	24	1.18343
18MR-04	18MR-04_1	115.9	109.4	1.918	0.025	0.1836	0.0016	8.6	1086	8.6	1086.1	8.9	1090	24	1090	24	0.357798
18MR-04	18MR-04_2	273	226	0.0798	0.0034	0.01219	0.0002	3.2	77.8	3.2	78.1	1.3	94	84	78.1	1.3	0.385604
18MR-04	18MR-04_3	270	110.4	0.0751	0.0035	0.01133	0.00018	3.4	74.1	3.4	72.6	1.1	110	89	72.6	1.1	2.02429
18MR-04	18MR-04_4	636	339	0.079	0.0024	0.01204	0.00016	2.2	77.2	2.2	77.2	1	104	58	77.2	1	0
18MR-04	18MR-04_5	229	37.3	15.04	0.22	0.5515	0.0062	14	2815	14	2830	26	2807	16	2807	16	0.81938
18MR-04	18MR-04_6	144.5	67.3	4.884	0.048	0.3236	0.0026	8.1	1799.4	8.1	1807	13	1795	16	1795	16	0.668524
18MR-04	18MR-04_8	558	51	18.49	0.38	0.555	0.011	20	3014	20	2845	46	3130	19	3130	19	9.10543	Core
18MR-04	18MR-04_8	286.7	215.3	0.0521	0.0062	0.00803	0.00038	6	51.5	6	51.5	2.4	80	230	51.5	2.4	0	Rim
18MR-04	18MR-04_9	130.9	124.8	0.0784	0.0047	0.01184	0.0002	4.4	76.3	4.4	75.9	1.2	120	110	75.9	1.2	0.524246
18MR-04	18MR-04_10	246	191	0.0532	0.0037	0.00783	0.00016	3.6	52.4	3.6	50.3	1	120	120	50.3	1	4.00763
18MR-04	18MR-04_12	186	142.6	12.08	0.18	0.4696	0.0058	14	2609	14	2481	25	2708	15	2708	15	8.38257
18MR-04	18MR-04_13	140.2	132	3.831	0.049	0.2789	0.0033	10	1598	10	1585	16	1617	22	1617	22	1.97897
18MR-04	18MR-04_15	423	298	4.769	0.056	0.3189	0.0035	9.7	1780.1	9.7	1784	17	1773	16	1773	16	0.620417
18MR-04	18MR-04_16	138	81.9	0.0741	0.0062	0.01085	0.00031	5.8	72	5.8	69.5	1.9	120	140	69.5	1.9	3.47222
18MR-04	18MR-04_17	168.9	131	26.45	0.29	0.7069	0.0081	11	3362	11	3445	31	3316	13	3316	13	3.89023
18MR-04	18MR-04_18	897	702	10.19	0.16	0.4251	0.0059	15	2451	15	2282	27	2595	15	2595	15	12.0617
18MR-04	18MR-04_19	423	175.7	0.531	0.01	0.06972	0.00082	6.6	431.5	6.6	434.4	4.9	413	35	434.4	4.9	0.672074
18MR-04	18MR-04_20	165.8	83.2	4.469	0.056	0.3007	0.0032	10	1724	10	1694	16	1762	19	1762	19	3.85925
18MR-04	18MR-04_21	54.9	65.7	0.079	0.0075	0.01254	0.00034	7	76.3	7	80.3	2.1	0	170	80.3	2.1	5.24246
18MR-04	18MR-04_22	190	112.8	-0.00082	0.00045	8e-06	1e-05	0.45	-0.84	0.45	0.05	0.066	-5200	3100	0.05	0.066	105.952
18MR-04	18MR-04_23	152.2	46.7	3.003	0.051	0.2348	0.0033	13	1406	13	1359	17	1473	25	1473	25	7.73931
18MR-04	18MR-04_24	309	289	0.0763	0.0039	0.01169	0.0002	3.6	74.4	3.6	74.9	1.3	82	94	74.9	1.3	0.672043
18MR-04	18MR-04_25	921	135.9	0.0756	0.0022	0.01158	0.00012	2.1	74	2.1	74.22	0.73	96	57	74.22	0.73	0.297297
18MR-04	18MR-04_26	80.2	48.8	13.49	0.17	0.5156	0.0057	12	2713	12	2679	24	2737	17	2737	17	2.11911
18MR-04	18MR-04_27	208.1	173.2	15.01	0.2	0.4446	0.0057	13	2814	13	2370	26	3149	13	3149	13	24.738
18MR-04	18MR-04_28	473	453	0.0804	0.0046	0.01138	0.00025	4.3	78.3	4.3	72.9	1.6	220	100	72.9	1.6	6.89655	Rim
18MR-04	18MR-04_29	281	152.8	4.884	0.071	0.3093	0.0044	12	1798	12	1737	22	1872	20	1872	20	7.21154
18MR-04	18MR-04_30	1158	28.7	3.784	0.04	0.2683	0.0026	8.4	1588.2	8.4	1532	13	1665	14	1665	14	7.98799
18MR-04	18MR-04_31	32.7	21.46	25.55	0.29	0.6706	0.0072	11	3329	11	3306	28	3343	16	3343	16	1.10679
18MR-04	18MR-04_33	278	146.9	10.08	0.11	0.454	0.0043	9.6	2441.6	9.6	2412	19	2469	13	2469	13	2.30863
18MR-04	18MR-04_34	335	230.7	0.1127	0.0049	0.01502	0.00022	4.4	108.1	4.4	96.1	1.4	330	78	96.1	1.4	11.1008
18MR-04	18MR-04_35	342	143	3.073	0.033	0.2451	0.0024	8.3	1425	8.3	1413	13	1440	22	1440	22	1.875
18MR-04	18MR-04_36	144.8	121.6	4.537	0.076	0.3034	0.0042	14	1736	14	1708	21	1772	27	1772	27	3.61174	Core
18MR-04	18MR-04_36	3260	25.3	0.0668	0.0024	0.00969	0.00028	2.3	65.7	2.3	62.1	1.8	197	76	62.1	1.8	5.47945	Rim
18MR-04	18MR-04_37	507	259	4.394	0.043	0.3047	0.0029	8.1	1710.1	8.1	1716	15	1704	15	1704	15	0.704225
18MR-04	18MR-04_38	1960	1142	0.0761	0.0015	0.01146	0.00015	1.4	74.4	1.4	73.42	0.96	121	38	73.42	0.96	1.3172
18MR-04	18MR-04_39	297	46.2	0.5429	0.0098	0.07158	0.00087	6.5	439.5	6.5	445.6	5.2	405	39	445.6	5.2	1.38794
18MR-04	18MR-04_40	314	165.2	3.396	0.034	0.2625	0.0023	7.7	1502.4	7.7	1502	12	1503	16	1503	16	0.0665336
18MR-04	18MR-04_41	372	551	0.0755	0.0032	0.01117	0.00017	3	73.8	3	71.6	1.1	143	78	71.6	1.1	2.98103
18MR-04	18MR-04_42	719	285	0.0736	0.0025	0.01115	0.00016	2.3	72	2.3	71.5	1	97	63	71.5	1	0.694444
18MR-04	18MR-04_43	1477	30.5	4.374	0.063	0.296	0.0053	12	1706	12	1670	26	1755	23	1755	23	4.8433	Core
18MR-04	18MR-04_43	1460	155	0.0671	0.0037	0.01028	0.00049	3.5	65.9	3.5	66	3.1	90	80	66	3.1	0.151745	Rim
18MR-04	18MR-04_44	474	183	0.0769	0.0026	0.0115	0.00018	2.4	75.1	2.4	73.7	1.1	127	63	73.7	1.1	1.86418
18MR-04	18MR-04_45	265	109.3	4.243	0.044	0.2868	0.0025	8.5	1681	8.5	1625	12	1752	17	1752	17	7.24886
18MR-04	18MR-04_46	229	566	2.72	0.05	0.2042	0.0031	13	1332	13	1197	16	1558	24	1558	24	23.1707
18MR-04	18MR-04_47	673	317.4	2.013	0.026	0.1875	0.0025	8.8	1118.7	8.8	1107	13	1147	22	1147	22	3.48736
18MR-04	18MR-04_48	557	45.5	8.16	0.26	0.3777	0.0089	29	2243	29	2064	42	2417	23	2417	23	14.6049	Core
18MR-04	18MR-04_48	915	199	0.0735	0.0042	0.01111	0.00024	4	72	4	71.2	1.5	110	110	71.2	1.5	1.11111	Rim
18MR-04	18MR-04_49	816	662	0.0769	0.0024	0.01179	0.00023	2.2	75.1	2.2	75.6	1.5	87	58	75.6	1.5	0.665779
18MR-04	18MR-04_50	704	252	2.566	0.031	0.2174	0.0027	9.4	1292.1	9.4	1268	14	1341	22	1341	22	5.4437
18MR-04	18MR-04_51	149.9	127.8	5.178	0.062	0.3276	0.004	10	1847	10	1826	19	1870	16	1870	16	2.35294
18MR-04	18MR-04_52	153.7	148.6	0.079	0.0043	0.01149	0.00022	4	76.9	4	73.7	1.4	190	110	73.7	1.4	4.16125
18MR-04	18MR-04_53	786	478	0.1029	0.0029	0.01573	0.00021	2.7	99.7	2.7	100.6	1.3	97	59	100.6	1.3	0.902708
18MR-04	18MR-04_54	89.7	75.1	3.143	0.046	0.2498	0.0026	11	1445	11	1437	13	1459	27	1459	27	1.50788
18MR-04	18MR-04_55	53.6	53.5	5.18	0.14	0.3316	0.007	23	1846	23	1845	34	1848	37	1848	37	0.162338
18MR-04	18MR-04_56	193.6	62.8	1.621	0.022	0.1602	0.0013	8.6	976.9	8.6	958.9	7.2	1022	26	1022	26	6.17417
18MR-04	18MR-04_57	1630	278	0.0822	0.0031	0.01256	0.00022	2.9	80.1	2.9	80.5	1.4	88	74	80.5	1.4	0.499376
18MR-04	18MR-04_58	161	79	12.12	0.22	0.5002	0.0068	18	2609	18	2613	29	2602	24	2602	24	0.422752
18MR-04	18MR-04_59	608	64.5	8.39	0.28	0.3648	0.0091	30	2272	30	2002	44	2527	19	2527	19	20.7756	Core
18MR-04	18MR-04_59	2330	886	0.076	0.0025	0.01131	0.00023	2.4	74.3	2.4	72.5	1.5	142	64	72.5	1.5	2.42261	Rim
18MR-04	18MR-04_60	16.98	10.53	14.39	0.26	0.5154	0.0079	17	2774	17	2677	34	2849	30	2849	30	6.03721
18MR-04	18MR-04_61	2020	1187	0.075	0.0013	0.01131	0.00013	1.2	73.4	1.2	72.5	0.85	112	38	72.5	0.85	1.22616
18MR-04	18MR-04_62	480	52.04	8.75	0.21	0.4013	0.009	23	2311	23	2171	42	2431	17	2431	17	10.6952
18MR-04	18MR-04_63	781	592	0.1051	0.0023	0.01563	0.00016	2.1	101.6	2.1	100	1	151	47	100	1	1.5748
18MR-04	18MR-04_64	694	151.2	3.993	0.045	0.2731	0.0025	9.2	1631.6	9.2	1556	13	1730	17	1730	17	10.0578
18MR-04	18MR-04_65	417	323	0.0812	0.0036	0.01129	0.00015	3.4	79	3.4	72.4	0.94	262	87	72.4	0.94	8.35443
18MR-04	18MR-04_66	24.51	18.43	1.843	0.07	0.1746	0.0033	25	1054	25	1037	18	1090	75	1090	75	4.86239
18MR-04	18MR-04_67	240	217	3.743	0.044	0.27	0.0024	9.6	1580.6	9.6	1541	12	1637	19	1637	19	5.86439
18MR-04	18MR-04_68	17.97	9.96	2.62	0.073	0.2265	0.0038	21	1301	21	1315	20	1273	55	1273	55	3.29929
18MR-04	18MR-04_69	84.5	61.7	13.64	0.18	0.5113	0.0058	12	2723	12	2661	25	2772	16	2772	16	4.00433
18MR-04	18MR-04_70	112.5	52.68	2.857	0.039	0.2361	0.0022	10	1370	10	1366	12	1377	24	1377	24	0.798838
18MR-04	18MR-04_71	587	193	0.0543	0.0027	0.00835	0.00018	2.6	53.6	2.6	53.6	1.1	92	81	53.6	1.1	0
18MR-04	18MR-04_72	208	164.5	0.078	0.0043	0.01143	0.00024	4.1	76	4.1	73.3	1.5	170	110	73.3	1.5	3.55263
18MR-04	18MR-04_73	486	202	0.501	0.0079	0.06636	0.00061	5.3	411.8	5.3	414.1	3.7	395	35	414.1	3.7	0.558524
18MR-04	18MR-04_74	612	616	0.1702	0.004	0.02512	0.00035	3.5	159.3	3.5	159.9	2.2	159	45	159.9	2.2	0.376648
18MR-04	18MR-04_75	623	556	0.0788	0.0024	0.01171	0.00017	2.2	77	2.2	75	1.1	142	60	75	1.1	2.5974
18MR-04	18MR-04_76	131.7	115	4.956	0.065	0.3215	0.0039	11	1810	11	1796	19	1833	22	1833	22	2.01855
18MR-04	18MR-04_77	108.1	110.5	5.519	0.061	0.3453	0.0031	9.6	1901.9	9.6	1912	15	1897	17	1897	17	0.790722
18MR-04	18MR-04_78	386	279	4.764	0.053	0.3195	0.0033	9.4	1777.1	9.4	1786	16	1770	14	1770	14	0.903955
18MR-04	18MR-04_79	182	49.2	0.1884	0.0063	0.02726	0.00035	5.4	174.7	5.4	173.4	2.2	208	72	173.4	2.2	0.744133
18MR-04	18MR-04_80	129	201	5.309	0.061	0.345	0.003	10	1870	10	1910	14	1823	18	1823	18	4.77235
18MR-04	18MR-04_81	35.5	30.7	1.672	0.038	0.1643	0.0022	14	994	14	980	12	1022	49	1022	49	4.10959
18MR-04	18MR-04_82	1079	476	10.21	0.15	0.392	0.014	14	2451	14	2149	61	2732	64	2732	64	21.3397
18MR-04	18MR-04_83	404	262	4.689	0.035	0.3204	0.0023	6.2	1764.6	6.2	1792	11	1738	13	1738	13	3.10702
18MR-04	18MR-04_84	197.1	287	3.99	0.049	0.2887	0.003	9.6	1632.3	9.6	1634	15	1629	18	1629	18	0.306937
18MR-04	18MR-04_85	1018	235.6	4.263	0.077	0.2943	0.0051	16	1683	16	1666	24	1723	14	1723	14	3.30818
18MR-04	18MR-04_86	362	54.2	13.51	0.14	0.54	0.005	9.7	2714.9	9.7	2785	22	2666	14	2666	14	4.46362
18MR-04	18MR-04_87	109.3	103.8	4.873	0.062	0.3142	0.0031	11	1795	11	1760	15	1842	20	1842	20	4.45168
18MR-04	18MR-04_88	130	133.3	6.343	0.069	0.3711	0.0039	9.3	2023.9	9.3	2033	18	2013	16	2013	16	0.993542
18MR-04	18MR-04_89	292	267	0.08	0.003	0.01155	0.00019	2.8	78	2.8	74	1.2	201	80	74	1.2	5.12821
18MR-04	18MR-04_90	362	267	0.0727	0.0028	0.01129	0.00016	2.6	71.2	2.6	72.3	1	61	76	72.3	1	1.54494
18MR-04	18MR-04_91	52.5	42.8	1.762	0.046	0.1675	0.0022	17	1028	17	998	12	1086	54	1086	54	8.10313
18MR-04	18MR-04_92	91.5	61.8	11.79	0.24	0.486	0.0077	19	2584	19	2551	33	2612	23	2612	23	2.33538
18MR-04	18MR-04_93	750	202	0.0711	0.0021	0.01078	0.00018	2	69.7	2	69.1	1.1	123	69	69.1	1.1	0.860832
18MR-04	18MR-04_94	51.4	27.43	1.77	0.041	0.1735	0.003	15	1032	15	1030	16	1037	50	1037	50	0.675024
18MR-04	18MR-04_95	217.6	240.7	1.829	0.028	0.1711	0.0024	10	1055	10	1017	13	1137	27	1137	27	10.5541
18MR-04	18MR-04_96	132.1	59.3	24.35	0.27	0.6493	0.0066	11	3283	11	3224	26	3321	14	3321	14	2.92081
18MR-04	18MR-04_97	387	369	0.0773	0.0028	0.01213	0.00015	2.7	75.5	2.7	77.71	0.98	45	69	77.71	0.98	2.92715
18MR-04	18MR-04_98	1147	243.2	5.17	0.11	0.3352	0.0064	18	1844	18	1861	31	1812	16	1812	16	2.70419
18MR-04	18MR-04_99	309	30.3	0.826	0.024	0.0913	0.0016	13	609	13	563	9.7	780	43	563	9.7	7.55337
18MR-04	18MR-04_100	164.7	59.9	4.359	0.054	0.3015	0.0034	11	1706	11	1698	17	1708	22	1708	22	0.58548
18MR-04	18MR-04_101	247.4	170.3	10.595	0.087	0.4802	0.004	7.7	2487.2	7.7	2527	18	2459	11	2459	11	2.76535
18MR-04	18MR-04_102	480	442	0.0835	0.0024	0.01228	0.00015	2.2	81.4	2.2	78.65	0.95	174	59	78.65	0.95	3.37838
18MR-04	18MR-04_104	555.7	559.8	5.221	0.05	0.3334	0.0035	7.8	1856.7	7.8	1854	17	1858	15	1858	15	0.215285
18MR-04	18MR-04_105	825	36.7	0.746	0.015	0.0904	0.0013	8.6	565.2	8.6	557.7	7.5	594	36	557.7	7.5	1.32696
18MR-04	18MR-04_106	91.8	78.4	1.879	0.033	0.1752	0.0018	12	1072	12	1040.6	9.8	1128	35	1128	35	7.74823
18MR-04	18MR-04_107	419	390	1.708	0.019	0.1715	0.0014	7.1	1010.5	7.1	1020	7.9	990	19	990	19	3.0303
18MR-04	18MR-04_108	220.4	49.91	4.547	0.051	0.3168	0.0033	9.6	1739.5	9.6	1773	16	1699	16	1699	16	4.3555
18MR-04	18MR-04_109	146	3.74	17.37	0.34	0.5897	0.009	18	2952	18	2986	36	2933	22	2933	22	1.80702
18MR-04	18MR-04_110	238	251	0.0768	0.003	0.01186	0.00017	2.8	75	2.8	76	1.1	61	79	76	1.1	1.33333
18MR-04	18MR-04_112	990	386	0.0785	0.0025	0.01117	0.00018	2.4	76.6	2.4	71.6	1.1	236	69	71.6	1.1	6.52742
18MR-04	18MR-04_113	224.8	139	4.545	0.06	0.3073	0.0028	11	1738	11	1727	14	1749	25	1749	25	1.25786
18MR-04	18MR-04_114	270	181	0.1247	0.0045	0.01704	0.00021	4.1	119	4.1	108.9	1.3	311	78	108.9	1.3	8.48739
18MR-04	18MR-04_115	179	283	0.087	0.0044	0.01303	0.00022	4.1	84.4	4.1	83.4	1.4	124	97	83.4	1.4	1.18483
18MR-04	18MR-04_116	387.2	335.2	18.85	0.22	0.5543	0.0068	11	3033	11	2842	28	3163	14	3163	14	10.1486
18MR-04	18MR-04_117	67.1	32.7	0.128	0.0079	0.01968	0.00047	7.1	121.3	7.1	125.6	2.9	80	120	125.6	2.9	3.54493
18MR-04	18MR-04_118	136.5	25.36	4.76	0.095	0.318	0.0045	17	1775	17	1779	22	1770	23	1770	23	0.508475
18MR-04	18MR-04_119	538	358	2.303	0.027	0.2128	0.002	8.2	1212.3	8.2	1244	11	1154	19	1154	19	7.79896
18MR-04	18MR-04_120	274.4	263	0.5229	0.0098	0.06712	0.00084	6.5	426.3	6.5	418.7	5.1	461	42	418.7	5.1	1.78278
18MR-04	18MR-04_121	568	285	0.0813	0.0037	0.0118	0.0002	3.5	79.3	3.5	75.6	1.3	183	89	75.6	1.3	4.66583
18MR-04	18MR-04_122	404	51.2	10.9	0.26	0.4528	0.0098	22	2509	22	2404	43	2593	15	2593	15	7.28885
18MR-04	18MR-04_123	796	39.7	4.914	0.054	0.321	0.0032	9.3	1805.7	9.3	1794	16	1818	11	1818	11	1.32013
18MR-04	18MR-04_124	586	47.6	4.659	0.064	0.31	0.0038	12	1759	12	1740	19	1788	18	1788	18	2.68456
18MR-04	18MR-04_125	235	172.3	0.0485	0.0032	0.00686	0.00016	3.1	47.9	3.1	44.1	1.1	230	130	44.1	1.1	7.93319
18MR-04	18MR-04_126	32.13	22.05	1.862	0.057	0.1769	0.0028	21	1065	21	1049	15	1098	56	1098	56	4.46266
18MR-04	18MR-04_127	409	110.8	1.798	0.023	0.1783	0.0019	8.4	1043.7	8.4	1057	11	1015	21	1015	21	4.13793
18MR-04	18MR-04_128	351	145	2.77	0.12	0.2299	0.0098	31	1342	31	1332	51	1373	35	1373	35	2.98616	Core
18MR-04	18MR-04_128	3710	427	0.09	0.0021	0.01341	0.00024	2	87.5	2	85.9	1.5	159	42	85.9	1.5	1.82857	Rim
18MR-04	18MR-04_130	307	246	0.0781	0.0031	0.01188	0.00017	2.9	76.2	2.9	76.2	1.1	90	78	76.2	1.1	0
18MR-04	18MR-04_132	249	50.6	4.239	0.049	0.2813	0.003	9.7	1681.6	9.7	1597	15	1789	17	1789	17	10.7323
18MR-04	18MR-04_133	25.7	21.97	16.36	0.74	0.563	0.028	46	2876	46	2850	120	2920	70	2920	70	2.39726
18MR-04	18MR-04_134	460	623	22.25	0.55	0.646	0.011	25	3185	25	3208	42	3173	18	3173	18	1.10306
18MR-04	18MR-04_135	329	184	0.1099	0.004	0.01618	0.0002	3.6	105.7	3.6	103.5	1.3	155	71	103.5	1.3	2.08136
18MR-04	18MR-04_136	193	49.16	13.93	0.46	0.5054	0.0089	33	2735	33	2635	38	2810	36	2810	36	6.22776
18MR-04	18MR-04_137	114.8	100.9	4.336	0.054	0.2964	0.0028	10	1699	10	1673	14	1726	23	1726	23	3.07068
18MR-04	18MR-04_138	22.15	29.01	4.68	0.11	0.3025	0.0051	19	1759	19	1702	25	1832	43	1832	43	7.09607
18MR-04	18MR-04_139	512	591	19.87	0.19	0.5733	0.0057	9.2	3084	9.2	2920	23	3192	11	3192	11	8.5213
18MR-04	18MR-04_140	995	396	0.0568	0.0018	0.008139	9e-05	1.7	56.1	1.7	52.25	0.58	220	67	52.25	0.58	6.86275
18MR-04	18MR-04_141	294	186.5	3.246	0.048	0.244	0.0032	12	1466	12	1406	17	1563	21	1563	21	10.0448
18MR-04	18MR-04_142	331	100.2	0.0532	0.0025	0.00814	0.00016	2.4	52.5	2.4	52.3	1	116	97	52.3	1	0.380952
18MR-04	18MR-04_143	1450	512	0.0723	0.0023	0.01107	0.00023	2.2	70.8	2.2	71	1.5	99	60	71	1.5	0.282486
18MR-04	18MR-04_144	723	513	0.0835	0.0039	0.01195	0.00021	3.7	81.3	3.7	76.6	1.4	204	83	76.6	1.4	5.78106	Rim
18MR-04	18MR-04_145	329	122.4	4.97	0.59	0.2708	0.008	72	1778	72	1543	41	2050	130	2050	130	24.7317
18MR-04	18MR-04_146	123	191	13.67	0.13	0.5249	0.0042	8.6	2727	8.6	2719	18	2733	12	2733	12	0.512258
18MR-04	18MR-04_147	235.3	175.5	0.0757	0.0037	0.01173	0.00022	3.5	73.8	3.5	75.2	1.4	57	90	75.2	1.4	1.89702
18MR-04	18MR-04_148	440	198	0.0763	0.0046	0.01119	0.00037	4.3	74.5	4.3	71.8	2.3	170	110	71.8	2.3	3.62416
18MR-04	18MR-04_149	144.6	116	0.0803	0.0046	0.01151	0.00027	4.3	78.1	4.3	73.8	1.7	200	110	73.8	1.7	5.50576
18MR-04	18MR-04_150	475	157.8	0.0735	0.0025	0.01096	0.00015	2.4	71.9	2.4	70.24	0.95	131	64	70.24	0.95	2.30876
18MR-05	18MR-05_1	180.5	38.5	10.33	0.2	0.4627	0.0076	18	2462	18	2448	34	2453	21	2453	21	0.203832
18MR-05	18MR-05_2	507	376	4.59	0.036	0.3128	0.0026	6.5	1746.7	6.5	1754	13	1729	13	1729	13	1.44592
18MR-05	18MR-05_3	679	118.8	0.0783	0.0026	0.01208	0.0002	2.5	76.5	2.5	77.4	1.3	55	61	77.4	1.3	1.17647
18MR-05	18MR-05_4	189.1	289.7	24.34	0.19	0.6678	0.0064	7.5	3281.3	7.5	3296	25	3260	12	3260	12	1.10429
18MR-05	18MR-05_5	139.5	130.9	5.314	0.059	0.3377	0.0039	9.5	1869.4	9.5	1877	18	1855	19	1855	19	1.18598
18MR-05	18MR-05_6	193	223	0.0789	0.0034	0.01159	0.0002	3.2	76.9	3.2	74.3	1.2	149	89	74.3	1.2	3.38101
18MR-05	18MR-05_7	208	70.1	13.97	0.1	0.5244	0.0038	6.8	2746.7	6.8	2717	16	2755.5	9.7	2755.5	9.7	1.39721
18MR-05	18MR-05_8	855	246.1	4.777	0.043	0.3168	0.0027	7	1782.4	7	1774	13	1770	12	1770	12	0.225989
18MR-05	18MR-05_10	470.6	269.9	0.0999	0.0038	0.01376	0.00023	3.5	96.5	3.5	88.1	1.5	274	78	88.1	1.5	8.70466
18MR-05	18MR-05_11	277.3	112.3	0.0536	0.0022	0.00808	0.00013	2.1	52.9	2.1	51.86	0.84	117	85	51.86	0.84	1.96597
18MR-05	18MR-05_12	282	85.2	14	0.15	0.5608	0.0055	10	2748	10	2869	23	2652	13	2652	13	8.1825
18MR-05	18MR-05_13	242	56.3	4.424	0.085	0.304	0.0059	16	1713	16	1709	29	1714	32	1714	32	0.291715
18MR-05	18MR-05_15	165	76.4	0.0953	0.0043	0.01459	0.00021	4.1	92.6	4.1	93.4	1.3	88	93	93.4	1.3	0.863931
18MR-05	18MR-05_16	718	121.3	4.712	0.045	0.3206	0.0034	7.9	1768.5	7.9	1792	17	1738	14	1738	14	3.10702
18MR-05	18MR-05_17	310.5	120.5	0.026	0.0016	0.004039	7.2e-05	1.6	26	1.6	25.98	0.46	50	120	25.98	0.46	0.0769231
18MR-05	18MR-05_18	296	98.3	0.0771	0.0027	0.01154	0.00017	2.5	75.3	2.5	74	1.1	125	69	74	1.1	1.72643
18MR-05	18MR-05_19	327	184.9	0.0828	0.003	0.01178	0.00025	2.8	80.7	2.8	75.5	1.6	238	82	75.5	1.6	6.44362
18MR-05	18MR-05_20	116.8	134.5	13.05	0.17	0.509	0.0062	13	2685	13	2651	27	2711	17	2711	17	2.21321
18MR-05	18MR-05_21	270	169.2	0.0794	0.0032	0.01171	0.00022	3	77.4	3	75.1	1.4	153	83	75.1	1.4	2.97158
18MR-05	18MR-05_22	416	290	0.1	0.0028	0.0149	0.00024	2.6	96.7	2.6	95.3	1.5	146	60	95.3	1.5	1.44778
18MR-05	18MR-05_23	170.6	270	24.18	0.22	0.685	0.006	9.1	3274.6	9.1	3362	23	3225	11	3225	11	4.24806
18MR-05	18MR-05_24	310	54.37	4.693	0.048	0.325	0.0029	8.6	1764.7	8.6	1813	14	1707	16	1707	16	6.20972
18MR-05	18MR-05_25	638	394	5.211	0.064	0.3413	0.0041	11	1853	11	1892	20	1814	15	1814	15	4.29989	Core
18MR-05	18MR-05_25	327	22.5	0.0898	0.0059	0.01354	0.00039	5.5	87.2	5.5	86.7	2.5	120	140	86.7	2.5	0.573394	Rim
18MR-05	18MR-05_26	108.7	70.9	0.1006	0.0086	0.01344	0.00038	7.9	96.7	7.9	86	2.4	310	170	86	2.4	11.0651
18MR-05	18MR-05_28	24.47	25.3	14.46	0.22	0.5507	0.0067	14	2777	14	2826	28	2745	18	2745	18	2.95082
18MR-05	18MR-05_29	235.7	246	15.36	0.12	0.5722	0.0048	7.5	2837.1	7.5	2916	20	2784	11	2784	11	4.74138
18MR-05	18MR-05_30	201.8	107.5	10.17	0.11	0.461	0.0052	10	2449	10	2443	23	2457	17	2457	17	0.569801
18MR-05	18MR-05_31	165.3	130.2	5.61	0.067	0.347	0.0037	10	1916	10	1919	18	1914	15	1914	15	0.261233
18MR-05	18MR-05_32	220.3	177.4	2.12	0.067	0.1856	0.0065	22	1149	22	1095	35	1267	56	1267	56	13.5754
18MR-05	18MR-05_34	96.6	68.3	7.37	0.31	0.3638	0.0054	38	2134	38	1998	26	2257	60	2257	60	11.4754
18MR-05	18MR-05_35	319	285	0.0833	0.0035	0.01222	0.0002	3.2	81	3.2	78.3	1.2	166	81	78.3	1.2	3.33333
18MR-05	18MR-05_36	438.6	127.4	5.67	0.11	0.2893	0.0028	16	1924	16	1638	14	2245	21	2245	21	27.0379
18MR-05	18MR-05_38	64.1	66.7	3.729	0.077	0.2707	0.0043	17	1575	17	1544	22	1612	30	1612	30	4.21836
18MR-05	18MR-05_39	476	288	0.0519	0.0022	0.00774	0.00014	2.1	51.4	2.1	49.7	0.91	137	94	49.7	0.91	3.30739
18MR-05	18MR-05_40	1100	644	0.074	0.0019	0.01112	0.00016	1.8	72.4	1.8	71.3	1	107	55	71.3	1	1.51934
18MR-05	18MR-05_41	327	161	0.3507	0.0077	0.04867	0.00063	5.6	305.5	5.6	306.3	3.9	289	46	306.3	3.9	0.261866
18MR-05	18MR-05_42	168.8	83.8	2.574	0.031	0.2258	0.0021	8.8	1292.2	8.8	1312	11	1252	21	1252	21	4.79233
18MR-05	18MR-05_43	766	726	3.422	0.031	0.2668	0.0028	7.2	1508.5	7.2	1524	14	1479	16	1479	16	3.0426
18MR-05	18MR-05_44	95.6	65.6	13.95	0.18	0.5275	0.0066	12	2744	12	2733	29	2746	18	2746	18	0.473416
18MR-05	18MR-05_45	156	191	5.28	0.12	0.3266	0.0075	20	1860	20	1819	37	1905	23	1905	23	4.51444
18MR-05	18MR-05_46	231.6	176.3	0.0802	0.0032	0.01198	0.0002	3	78.2	3	76.8	1.3	127	81	76.8	1.3	1.79028
18MR-05	18MR-05_47	556	184.3	0.2719	0.0047	0.03848	0.00059	3.9	244.5	3.9	243.4	3.7	234	42	243.4	3.7	0.449898
18MR-05	18MR-05_51	79.3	72.9	15.24	0.15	0.5697	0.0047	9.6	2829.4	9.6	2906	19	2766	13	2766	13	5.06146
18MR-05	18MR-05_53	246.2	174.5	0.0842	0.0033	0.0123	0.00021	3	82.3	3	78.8	1.3	170	78	78.8	1.3	4.25273
18MR-05	18MR-05_54	3650	1615	0.04228	0.00066	0.006564	6.5e-05	0.64	42.04	0.64	42.18	0.42	40	32	42.18	0.42	0.333016
18MR-05	18MR-05_55	217	106	0.091	0.0051	0.01326	0.00034	4.8	88.2	4.8	84.9	2.2	170	110	84.9	2.2	3.7415
18MR-05	18MR-05_57	267.6	126	10.85	0.26	0.487	0.01	24	2506	24	2556	46	2462	15	2462	15	3.81803
18MR-05	18MR-05_58	276	315	0.0839	0.0032	0.01262	0.0002	3	81.6	3	80.9	1.3	114	73	80.9	1.3	0.857843
18MR-05	18MR-05_59	164.4	117.3	14.804	0.093	0.5501	0.0031	5.9	2802.2	5.9	2825	13	2779.6	9.8	2779.6	9.8	1.63333
18MR-05	18MR-05_60	97.7	124.4	14.87	0.18	0.5551	0.0071	12	2805	12	2844	30	2773	16	2773	16	2.5604
18MR-05	18MR-05_61	524	108.7	4.626	0.069	0.3194	0.0055	12	1752	12	1785	27	1712	24	1712	24	4.26402
18MR-05	18MR-05_62	209.7	198.4	3.216	0.039	0.2555	0.0027	9.5	1459.7	9.5	1466	14	1447	22	1447	22	1.31306
18MR-05	18MR-05_63	107.9	84.9	14.34	0.14	0.5398	0.0046	9.2	2771.8	9.2	2784	19	2763	12	2763	12	0.760043
18MR-05	18MR-05_64	97.4	87.5	14.93	0.14	0.5555	0.0051	8.8	2809.4	8.8	2847	21	2781	12	2781	12	2.37325
18MR-05	18MR-05_65	2640	1470	0.0756	0.0013	0.01137	0.00012	1.2	74	1.2	72.86	0.79	110	30	72.86	0.79	1.54054
18MR-05	18MR-05_66	278	272	0.0792	0.0031	0.01211	0.00015	2.9	77.2	2.9	77.61	0.93	86	75	77.61	0.93	0.531088
18MR-05	18MR-05_67	134.8	69.7	10.564	0.085	0.4777	0.0027	7.5	2484.7	7.5	2517	12	2459	11	2459	11	2.35868
18MR-05	18MR-05_68	97.6	163.2	7.569	0.078	0.4129	0.0031	9.3	2179.8	9.3	2228	14	2136	17	2136	17	4.30712
18MR-05	18MR-05_69	290	244	0.0785	0.0028	0.01188	0.00016	2.7	76.6	2.7	76.15	0.99	110	68	76.15	0.99	0.587467
18MR-05	18MR-05_70	68.4	97.1	5.798	0.076	0.3603	0.0035	11	1944	11	1983	17	1903	21	1903	21	4.20389
18MR-05	18MR-05_71	578	462.7	0.0478	0.0016	0.007498	8.4e-05	1.5	47.3	1.5	48.15	0.54	45	68	48.15	0.54	1.79704
18MR-05	18MR-05_72	579	208.6	0.0726	0.0021	0.0111	0.00012	2	71.1	2	71.14	0.75	88	59	71.14	0.75	0.0562588
18MR-05	18MR-05_73	123.8	37.7	22.98	0.85	0.6473	0.0098	40	3210	40	3215	38	3210	49	3210	49	0.155763
18MR-05	18MR-05_74	117.6	106.3	0.0907	0.0049	0.0118	0.00024	4.5	87.8	4.5	75.6	1.5	380	110	75.6	1.5	13.8952
18MR-05	18MR-05_75	147	87.2	12.69	0.14	0.4956	0.0053	10	2655	10	2594	23	2707	12	2707	12	4.17436
18MR-05	18MR-05_76	1054	1040	0.0693	0.0016	0.01052	0.00012	1.5	68	1.5	67.49	0.75	103	47	67.49	0.75	0.75
18MR-05	18MR-05_77	389	235	0.0795	0.003	0.01197	0.00018	2.8	77.5	2.8	76.7	1.2	117	70	76.7	1.2	1.03226
18MR-05	18MR-05_79	211.4	78.4	4.898	0.041	0.3245	0.002	7.1	1801	7.1	1811.6	9.8	1795	14	1795	14	0.924791
18MR-05	18MR-05_80	615	217	0.0631	0.0018	0.00974	9.1e-05	1.7	62.1	1.7	62.48	0.58	63	58	62.48	0.58	0.611916
18MR-05	18MR-05_81	149	86.8	13.66	0.15	0.5243	0.0043	10	2725	10	2716	18	2736	14	2736	14	0.730994
18MR-05	18MR-05_82	1130	468	0.0839	0.003	0.01272	0.00018	2.8	81.7	2.8	81.5	1.2	105	68	81.5	1.2	0.244798
18MR-05	18MR-05_84	23.9	50.3	3.095	0.078	0.248	0.0039	19	1426	19	1427	20	1424	46	1424	46	0.210674
18MR-05	18MR-05_85	127.7	69.7	4.891	0.075	0.3027	0.0035	13	1798	13	1704	18	1912	23	1912	23	10.8787
18MR-05	18MR-05_86	1490	344	0.0769	0.0019	0.01178	0.00012	1.8	75.4	1.8	75.5	0.74	88	52	75.5	0.74	0.132626
18MR-05	18MR-05_87	176	59.4	14.84	0.14	0.561	0.0054	9.1	2803.6	9.1	2869	22	2759	13	2759	13	3.98695
18MR-05	18MR-05_88	96	38.6	26.25	0.23	0.6934	0.0075	8.6	3355.3	8.6	3394	29	3328	14	3328	14	1.98317
18MR-05	18MR-05_89	323	164.1	11.069	0.078	0.4802	0.0031	6.5	2528.2	6.5	2528	14	2528.4	9.1	2528.4	9.1	0.0158203
18MR-05	18MR-05_90	266.1	273.9	0.5627	0.0092	0.0716	0.00063	6	452.6	6	445.7	3.8	479	36	445.7	3.8	1.52452
18MR-05	18MR-05_91	736	450	0.0776	0.003	0.01132	0.00019	2.8	75.8	2.8	72.6	1.2	169	77	72.6	1.2	4.22164
18MR-05	18MR-05_93	189.7	94.7	24.48	0.4	0.6637	0.0072	16	3287	16	3284	27	3280	20	3280	20	0.121951
18MR-05	18MR-05_96	268.5	80	2.288	0.027	0.2072	0.0018	8.2	1207.5	8.2	1213.6	9.7	1198	20	1198	20	1.30217
18MR-05	18MR-05_98	191.9	166.7	0.0862	0.0068	0.01146	0.00031	6.3	83.7	6.3	73.5	2	370	160	73.5	2	12.1864
18MR-05	18MR-05_99	292	200.5	10.44	0.3	0.4344	0.0081	28	2468	28	2324	37	2591	24	2591	24	10.3049
18MR-05	18MR-05_100	146.8	114.8	0.0866	0.0042	0.01197	0.0002	3.9	84	3.9	76.7	1.3	290	100	76.7	1.3	8.69048
18MR-05	18MR-05_101	576	444	11.172	0.076	0.5015	0.0033	6.4	2537.1	6.4	2620	14	2475	11	2475	11	5.85859
18MR-05	18MR-05_102	238	330	11.02	0.24	0.4458	0.007	22	2518	22	2374	32	2660	15	2660	15	10.7519
18MR-05	18MR-05_103	257.8	49.8	24.66	0.21	0.675	0.0052	8.4	3293.9	8.4	3324	20	3280.1	8.6	3280.1	8.6	1.33837
18MR-05	18MR-05_104	98.5	70	15.15	0.17	0.5711	0.0051	11	2823	11	2911	21	2764	15	2764	15	5.31838
18MR-05	18MR-05_105	47.15	26.47	0.812	0.022	0.0985	0.0013	13	602	13	605.7	7.6	570	62	605.7	7.6	0.614618
18MR-05	18MR-05_106	667	379	0.0818	0.0018	0.01234	0.00016	1.7	79.8	1.7	79	1	120	45	79	1	1.00251
18MR-05	18MR-05_107	435	41.2	23.06	0.37	0.6488	0.0076	16	3228	16	3223	30	3233	19	3233	19	0.30931
18MR-05	18MR-05_108	448	270.5	2.914	0.055	0.2281	0.0038	15	1386	15	1324	20	1481	31	1481	31	10.6009
18MR-05	18MR-05_109	554	437	0.0822	0.0024	0.01268	0.00016	2.1	80.4	2.1	81.2	1	68	60	81.2	1	0.995025
18MR-05	18MR-05_110	151	174.9	26.19	0.18	0.7195	0.0051	6.7	3352.9	6.7	3493	19	3274.7	7.9	3274.7	7.9	6.66626
18MR-05	18MR-05_111	756	577	9.79	0.56	0.371	0.021	64	2367	64	2010	100	2756	15	2756	15	27.0682
18MR-05	18MR-05_112	180.6	102.5	0.518	0.011	0.06711	0.00087	7.1	422.6	7.1	418.6	5.3	433	46	418.6	5.3	0.946522
18MR-05	18MR-05_114	320	30.4	1.787	0.026	0.178	0.0026	9.4	1039.3	9.4	1055	14	1013	27	1013	27	4.1461
18MR-05	18MR-05_115	117.8	108.7	0.0785	0.0045	0.01252	0.00024	4.2	76.4	4.2	80.2	1.5	30	110	80.2	1.5	4.97382
18MR-05	18MR-05_116	101.8	78.4	13.67	0.14	0.5202	0.0054	9.8	2725.9	9.8	2699	23	2747	17	2747	17	1.74736
18MR-05	18MR-05_117	220	217	0.0796	0.0037	0.01218	0.00018	3.5	77.6	3.5	78	1.2	95	86	78	1.2	0.515464
18MR-05	18MR-05_118	118	142	14.99	0.21	0.5719	0.0074	13	2814	13	2913	30	2752	15	2752	15	5.85029
18MR-05	18MR-05_119	231.2	129.2	4.577	0.043	0.3188	0.003	7.8	1744.4	7.8	1784	15	1710	17	1710	17	4.32749
18MR-05	18MR-05_120	296	247	0.0843	0.0045	0.01251	0.00024	4.2	82	4.2	80.1	1.5	150	110	80.1	1.5	2.31707
18MR-05	18MR-05_121	298	194	0.0715	0.004	0.01149	0.00029	3.8	69.9	3.8	73.7	1.8	50	120	73.7	1.8	5.43634
18MR-05	18MR-05_122	395.8	97.7	1.544	0.022	0.1363	0.0016	8.6	946.9	8.6	823.8	8.9	1251	23	823.8	8.9	13.0003
18MR-05	18MR-05_123	887	558	0.0844	0.0023	0.01235	0.00014	2.1	82.1	2.1	79.14	0.9	179	53	79.14	0.9	3.60536
18MR-05	18MR-05_124	263	93.6	7.99	0.24	0.396	0.01	29	2217	29	2147	47	2296	25	2296	25	6.48955
18MR-05	18MR-05_126	155	194.4	4.575	0.085	0.306	0.0059	16	1741	16	1719	29	1773	30	1773	30	3.04569
18MR-05	18MR-05_127	176	116	23.1	0.27	0.6273	0.0076	11	3230	11	3138	30	3291	14	3291	14	4.64904
18MR-05	18MR-05_128	259	297.9	0.0831	0.003	0.01282	0.00021	2.9	81.3	2.9	82.1	1.3	87	73	82.1	1.3	0.98401
18MR-05	18MR-05_130	490	233	0.0807	0.0033	0.01232	0.00017	3.1	78.6	3.1	79	1.1	100	79	79	1.1	0.508906
18MR-05	18MR-05_131	468	181.5	14.97	0.18	0.5531	0.0068	12	2812	12	2836	28	2789	11	2789	11	1.68519
18MR-05	18MR-05_132	64.7	96.2	14.07	0.12	0.5348	0.0045	8.2	2753.3	8.2	2761	19	2745	13	2745	13	0.582878
18MR-05	18MR-05_133	493	463	0.0797	0.0026	0.01223	0.00012	2.5	77.8	2.5	78.36	0.78	91	70	78.36	0.78	0.719794
18MR-05	18MR-05_134	775	181.4	0.0783	0.0023	0.01205	0.00011	2.2	76.4	2.2	77.22	0.7	76	59	77.22	0.7	1.0733
18MR-05	18MR-05_135	141	143	15.011	0.097	0.5608	0.0039	6.1	2815.3	6.1	2869	16	2770	10	2770	10	3.57401
18MR-05	18MR-05_136	1197	100.2	4.861	0.051	0.326	0.0035	8.9	1794.9	8.9	1819	17	1762	14	1762	14	3.23496
18MR-05	18MR-05_138	369	307	0.0799	0.0025	0.01226	0.00014	2.4	78	2.4	78.54	0.87	59	60	78.54	0.87	0.692308
18MR-05	18MR-05_139	598	241.1	4.817	0.043	0.3162	0.003	7.5	1787.1	7.5	1771	15	1803	14	1803	14	1.77482
18MR-05	18MR-05_142	214	97.6	0.078	0.0037	0.01199	0.00018	3.5	76	3.5	76.8	1.2	89	89	76.8	1.2	1.05263
18MR-05	18MR-05_143	22.1	16.01	14.6	0.28	0.5451	0.0092	18	2783	18	2805	39	2764	24	2764	24	1.48336
18MR-05	18MR-05_144	49.8	114.1	11.32	0.18	0.4606	0.0064	15	2548	15	2441	28	2626	20	2626	20	7.04494
18MR-05	18MR-05_145	331	160.2	20.34	0.26	0.596	0.0084	12	3106	12	3011	34	3165	19	3165	19	4.86572
18MR-05	18MR-05_146	119	117.4	4.692	0.053	0.3156	0.0024	9.4	1764.1	9.4	1768	12	1757	19	1757	19	0.626067
18MR-05	18MR-05_148	428	104.6	2.359	0.024	0.2104	0.0021	7.4	1229.3	7.4	1231	11	1228	20	1228	20	0.2443
18MR-05	18MR-05_149	270.6	282.5	2.033	0.021	0.1941	0.0013	7.1	1126.1	7.1	1143.6	7	1095	19	1095	19	4.43836
18MR-05	18MR-05_150	251.3	143.6	0.1098	0.0031	0.01582	0.00018	2.8	105.7	2.8	101.2	1.2	204	61	101.2	1.2	4.25733
18MR-06	18MR-06_4	246.8	119.9	4.46	0.12	0.2984	0.0034	11	1713	11	1683	17	1743	22	1743	22	3.44234
18MR-06	18MR-06_11	172.5	67.7	9.53	0.21	0.4047	0.0044	18	2387	18	2190	20	2538	30	2538	30	13.7116
18MR-06	18MR-06_12	1061	304	4.444	0.04	0.298	0.0023	7.4	1719.7	7.4	1681	11	1752	14	1752	14	4.05251
18MR-06	18MR-06_24	342	266.2	22.74	0.29	0.6263	0.0069	12	3214	12	3138	28	3239	12	3239	12	3.11825
18MR-06	18MR-06_25	815	211	5.55	0.088	0.3284	0.004	14	1908	14	1829	19	1978	23	1978	23	7.53286
18MR-06	18MR-06_26	1614	186	4.201	0.068	0.2469	0.0041	13	1673	13	1421	21	1991	26	1991	26	28.6288
18MR-06	18MR-06_28	283.2	106.7	4.69	0.14	0.3008	0.0037	17	1753	17	1695	18	1811	46	1811	46	6.4053
18MR-06	18MR-06_29	663	471	16.51	0.49	0.5039	0.0071	25	2895	25	2628	31	3083	39	3083	39	14.7584
18MR-06	18MR-06_31	216.8	70.4	4.831	0.069	0.3119	0.0033	12	1788	12	1750	16	1817	27	1817	27	3.6874
18MR-06	18MR-06_32	848	574	0.327	0.061	0.00209	0.00016	34	266	34	13.4	1.1	5700	420	13.4	1.1	94.9624
18MR-06	18MR-06_34	194.1	69.2	2.3	0.11	0.1811	0.003	22	1193	22	1073	16	1378	64	1378	64	22.1335
18MR-06	18MR-06_35	49.6	34.4	20.7	1.7	0.586	0.017	49	3093	49	2987	57	3107	69	3107	69	3.86225
18MR-06	18MR-06_38	659	239	10.86	0.34	0.458	0.014	33	2504	33	2451	54	2558	16	2558	16	4.18296
18MR-06	18MR-06_40	112.8	106	6.03	0.54	0.3176	0.0059	48	1933	48	1776	28	2052	85	2052	85	13.4503
18MR-06	18MR-06_41	303.8	119.9	4.951	0.068	0.3235	0.0035	12	1810	12	1806	17	1809	22	1809	22	0.165837
18MR-06	18MR-06_42	231.8	172.4	2.306	0.036	0.1996	0.0024	11	1213	11	1173	13	1281	28	1281	28	8.43091
18MR-06	18MR-06_47	263.4	120.9	3.17	0.72	0.1816	0.0068	78	1256	78	1062	28	1460	130	1460	130	27.2603
18MR-06	18MR-06_50	114.7	57.7	3.2	0.3	0.205	0.0039	44	1423	44	1201	21	1699	87	1699	87	29.3114
18MR-06	18MR-06_51	112.7	43.9	27.23	0.65	0.685	0.012	22	3384	22	3359	47	3389	41	3389	41	0.885217
18MR-06	18MR-06_52	416	110.8	4.553	0.075	0.2924	0.0046	14	1738	14	1652	23	1839	19	1839	19	10.1686
18MR-06	18MR-06_55	563	46.8	15.57	0.24	0.5431	0.0058	15	2848	15	2795	24	2889	19	2889	19	3.25372
18MR-06	18MR-06_58	743	156.6	4.993	0.063	0.323	0.0027	10	1816	10	1804	13	1833	20	1833	20	1.58211
18MR-06	18MR-06_59	70.9	111	8.51	0.72	0.3787	0.0058	48	2234	48	2068	26	2344	89	2344	89	11.7747
18MR-06	18MR-06_60	519	142.1	5.42	0.12	0.3177	0.003	15	1880	15	1778	15	1977	32	1977	32	10.0658
18MR-06	18MR-06_63	156	117.8	14.39	0.2	0.5359	0.0072	13	2774	13	2765	30	2780	20	2780	20	0.539568
18MR-06	18MR-06_65	501.9	149.5	17.65	0.31	0.555	0.0063	16	2967	16	2849	25	3046	27	3046	27	6.4675
18MR-06	18MR-06_66	216	157.6	5.56	0.083	0.3293	0.0034	12	1908	12	1838	16	1976	19	1976	19	6.98381
18MR-06	18MR-06_70	88.9	64.6	18.23	0.99	0.552	0.014	42	2979	42	2815	46	3053	65	3053	65	7.79561
18MR-06	18MR-06_72	747	519	11.36	0.28	0.4806	0.0088	22	2558	22	2528	38	2558	26	2558	26	1.17279
18MR-06	18MR-06_73	501	133.5	24.85	0.22	0.6368	0.0054	9	3302.5	9	3175	21	3373	12	3373	12	5.87015
18MR-06	18MR-06_80	512	56.2	2.18	0.093	0.1849	0.0034	22	1159	22	1093	18	1258	56	1258	56	13.1161
18MR-06	18MR-06_83	423	160.9	10.15	0.13	0.4492	0.0045	12	2447	12	2391	20	2482	17	2482	17	3.6664
18MR-06	18MR-06_84	1106	179.9	4.198	0.059	0.2731	0.0039	11	1672	11	1556	20	1810	13	1810	13	14.0331	Core
18MR-06	18MR-06_85	279	398	14.94	0.16	0.5457	0.0048	11	2811	11	2806	20	2804	14	2804	14	0.0713267
18MR-06	18MR-06_88	610	67.6	2.79	0.12	0.1988	0.0034	27	1340	27	1168	18	1602	66	1602	66	27.0911
18MR-06	18MR-06_89	233.1	203.5	5.57	0.52	0.3077	0.0041	54	1871	54	1729	20	2000	100	2000	100	13.55
18MR-06	18MR-06_91	249.5	241.1	12.35	0.23	0.4844	0.0074	18	2628	18	2544	32	2680	32	2680	32	5.07463
18MR-06	18MR-06_92	818	224.6	10.56	0.14	0.4722	0.0057	12	2484	12	2492	25	2466	14	2466	14	1.05434
18MR-06	18MR-06_93	121.9	100.9	4.3	0.51	0.2422	0.0049	51	1613	51	1397	25	1850	120	1850	120	24.4865
18MR-06	18MR-06_94	64	88	14.9	0.27	0.5322	0.0072	17	2805	17	2754	32	2832	26	2832	26	2.75424
18MR-06	18MR-06_96	374	325	5.38	0.59	0.2767	0.0047	86	1849	86	1574	24	2080	150	2080	150	24.3269
18MR-06	18MR-06_97	290.5	302.3	4.057	0.067	0.2839	0.0032	13	1644	13	1611	16	1684	23	1684	23	4.33492
18MR-06	18MR-06_101	535	114.7	5.79	0.12	0.3421	0.0029	17	1940	17	1896	14	1978	27	1978	27	4.1456
18MR-06	18MR-06_103	439	526	15.24	0.24	0.5434	0.0051	14	2826	14	2796	21	2838	20	2838	20	1.47992
18MR-06	18MR-06_105	521.1	197.1	12.21	0.12	0.5035	0.0055	9.3	2619.5	9.3	2628	24	2617	12	2617	12	0.420329
18MR-06	18MR-06_107	289.7	90.3	4.85	0.29	0.2982	0.0036	29	1753	29	1682	18	1830	55	1830	55	8.08743
18MR-06	18MR-06_109	568	132.6	5.21	0.066	0.3138	0.0033	11	1853	11	1759	16	1959	15	1959	15	10.2093
18MR-06	18MR-06_111	211	167	13.13	0.15	0.4926	0.0052	11	2688	11	2581	22	2772	15	2772	15	6.89033
18MR-06	18MR-06_116	187.2	86.7	5.068	0.076	0.3073	0.0039	13	1828	13	1726	19	1946	22	1946	22	11.3052
18MR-06	18MR-06_119	634	480	13.51	0.15	0.5212	0.0054	11	2714	11	2703	23	2727	14	2727	14	0.880088
18MR-06	18MR-06_120	212.8	160.9	7.06	0.16	0.3792	0.004	16	2119	16	2072	19	2150	26	2150	26	3.62791
18MR-06	18MR-06_122	323.2	235	24.86	0.26	0.6569	0.0064	10	3301	10	3254	25	3330	13	3330	13	2.28228
18MR-06	18MR-06_127	58.7	39.2	6.38	0.11	0.3338	0.004	15	2025	15	1856	20	2201	26	2201	26	15.6747
18MR-06	18MR-06_130	940	339	3.561	0.073	0.25	0.0032	16	1537	16	1438	16	1667	25	1667	25	13.7373
18MR-06	18MR-06_132	386	342	15.38	0.64	0.4855	0.0081	38	2826	38	2549	36	3023	70	3023	70	15.6798
18MR-06	18MR-06_133	614	180.2	8.68	0.43	0.3532	0.0061	45	2297	45	1948	29	2609	69	2609	69	25.3354
18MR-06	18MR-06_134	147.9	123.6	18.4	0.72	0.5633	0.0098	31	2995	31	2877	39	3060	57	3060	57	5.98039
18MR-06	18MR-06_135	229.3	104.7	22.9	0.22	0.6311	0.0061	9.4	3222	9.4	3153	24	3261	11	3261	11	3.31187
18MR-06	18MR-06_137	108.6	70.9	21.1	2.1	0.579	0.016	74	3078	74	2939	65	3140	110	3140	110	6.40127
18MR-06	18MR-06_141	979	127	4.665	0.062	0.2995	0.0037	11	1760	11	1688	18	1852	17	1852	17	8.85529
18MR-06	18MR-06_142	264.7	86.3	5.78	0.11	0.3246	0.0026	16	1940	16	1812	13	2081	27	2081	27	12.9265
18MR-06	18MR-06_145	587	220	4.782	0.093	0.2962	0.0038	17	1782	17	1671	19	1915	31	1915	31	12.7415
18MR-06	18MR-06_147	1221	71.6	13.21	0.38	0.462	0.013	27	2688	27	2444	56	2887	61	2887	61	15.3446
18MR-06	18MR-06_148	263.4	163.8	5.33	0.31	0.3049	0.0039	35	1845	35	1714	19	1980	75	1980	75	13.4343
18MR-06	18MR-06_149	120.9	82.1	26.6	1.3	0.669	0.012	36	3344	36	3296	44	3367	57	3367	57	2.1087
18MR-06	18MR-06_150	320	18.41	15.07	0.19	0.4478	0.0054	12	2819	12	2385	24	3152	21	3152	21	24.3338	Core
18MR-07	18MR-07_1	63.3	57	12.16	0.11	0.4983	0.004	8.5	2615.7	8.5	2606	17	2625	13	2625	13	0.72381
18MR-07	18MR-07_2	64.1	89.7	5.555	0.056	0.3461	0.0024	9	1908.9	9	1916	12	1899	17	1899	17	0.895208
18MR-07	18MR-07_3	260.2	92.9	2.363	0.025	0.2096	0.0012	7.2	1231.7	7.2	1226.5	6.5	1238	18	1238	18	0.928918
18MR-07	18MR-07_4	416	102.4	4.138	0.098	0.2741	0.0064	18	1663	18	1560	32	1801	34	1801	34	13.3815
18MR-07	18MR-07_5	62.6	29.15	5.235	0.061	0.3359	0.0027	9.9	1856.9	9.9	1866	13	1842	20	1842	20	1.30293
18MR-07	18MR-07_6	380	265	0.2131	0.0046	0.03041	0.0003	3.9	195.9	3.9	193.1	1.9	228	41	193.1	1.9	1.4293
18MR-07	18MR-07_7	93.4	99.5	15	0.14	0.5676	0.004	9	2814.3	9	2897	16	2756	14	2756	14	5.11611
18MR-07	18MR-07_8	272.9	85.2	2.192	0.02	0.1996	0.0017	6.4	1177.8	6.4	1173.2	9.2	1183	16	1183	16	0.828402
18MR-07	18MR-07_9	73.3	77	4.86	0.053	0.3141	0.0021	9.2	1794.2	9.2	1761	10	1833	20	1833	20	3.92799
18MR-07	18MR-07_10	276	139.5	0.1925	0.0047	0.02788	0.00034	4	178.5	4	177.3	2.1	191	53	177.3	2.1	0.672269
18MR-07	18MR-07_11	291	47.4	4.315	0.041	0.2994	0.0027	7.7	1695.5	7.7	1688	14	1701	14	1701	14	0.764256
18MR-07	18MR-07_12	119.3	104.1	16.86	0.16	0.5756	0.0044	8.9	2926.3	8.9	2930	18	2921	12	2921	12	0.308114
18MR-07	18MR-07_13	192	61.4	4.642	0.064	0.3157	0.0033	12	1755	12	1768	16	1733	15	1733	15	2.01962
18MR-07	18MR-07_14	271.2	178.9	4.121	0.045	0.2893	0.0025	8.9	1657.9	8.9	1638	12	1676	16	1676	16	2.2673	Core
18MR-07	18MR-07_14	772	90.2	0.142	0.025	0.01882	0.00083	21	134	21	120.2	5.3	170	170	120.2	5.3	10.2985	Rim
18MR-07	18MR-07_15	260.2	101.2	5.321	0.074	0.3294	0.0045	12	1871	12	1835	22	1904	16	1904	16	3.62395
18MR-07	18MR-07_16	81.2	46.6	16.61	0.18	0.5904	0.0049	11	2911	11	2990	20	2851	14	2851	14	4.87548
18MR-07	18MR-07_17	248.3	374	0.5298	0.0084	0.06817	0.00059	5.6	431.2	5.6	425.1	3.6	448	36	425.1	3.6	1.41466
18MR-07	18MR-07_18	230.8	88.9	1.746	0.018	0.1681	0.0013	6.9	1025.9	6.9	1001.7	7.2	1070	21	1070	21	6.38318
18MR-07	18MR-07_19	693	355	0.0951	0.0021	0.01403	0.00014	1.9	92.2	1.9	89.81	0.91	142	44	89.81	0.91	2.59219
18MR-07	18MR-07_20	99.3	76.4	3.975	0.061	0.2865	0.0029	12	1630	12	1623	15	1629	21	1629	21	0.368324	Rim
18MR-07	18MR-07_20	69	52.2	4.24	0.078	0.3078	0.0039	15	1680	15	1729	19	1608	29	1608	29	7.52488	Core
18MR-07	18MR-07_21	31.73	49.55	5.79	0.1	0.356	0.0035	12	1936	12	1962	16	1899	25	1899	25	3.31754
18MR-07	18MR-07_22	525	131.9	6.973	0.083	0.3195	0.0033	10	2107	10	1787	16	2429.2	9.9	2429.2	9.9	26.4367
18MR-07	18MR-07_23	38.4	100.1	7.83	0.29	0.37	0.013	33	2200	33	2023	61	2371	26	2371	26	14.6774
18MR-07	18MR-07_24	119.5	92.6	12	0.13	0.4964	0.0043	9.9	2602.7	9.9	2598	18	2599	13	2599	13	0.0384763
18MR-07	18MR-07_25	146.2	120	0.0955	0.0053	0.01348	0.00025	4.8	92.2	4.8	86.3	1.6	198	97	86.3	1.6	6.39913
18MR-07	18MR-07_26	161.3	77.5	4.08	0.026	0.2919	0.0015	5.2	1649.8	5.2	1651	7.4	1638	11	1638	11	0.793651
18MR-07	18MR-07_27	1059	138.8	6.52	0.11	0.3701	0.0074	15	2046	15	2028	35	2055	28	2055	28	1.31387	Core
18MR-07	18MR-07_28	198.2	159	24.84	0.16	0.6726	0.0044	6.5	3302.2	6.5	3315	17	3284.4	7.3	3284.4	7.3	0.931677
18MR-07	18MR-07_29	106.2	72.33	2.08	0.033	0.1938	0.0019	10	1144	10	1141	10	1140	25	1140	25	0.0877193
18MR-07	18MR-07_30	229	58.8	8.29	0.11	0.3917	0.0066	12	2262	12	2129	31	2375	23	2375	23	10.3579
18MR-07	18MR-07_31	106.4	94.8	13.32	0.16	0.5207	0.0058	11	2701	11	2701	24	2705	17	2705	17	0.147874
18MR-07	18MR-07_32	909	628	0.0991	0.0023	0.01413	0.00021	2.2	95.9	2.2	90.5	1.3	230	56	90.5	1.3	5.63087
18MR-07	18MR-07_33	323.7	57.8	11.975	0.096	0.5392	0.0036	7.5	2601.9	7.5	2780	15	2467	11	2467	11	12.6875	Core
18MR-07	18MR-07_33	1860	601	0.0751	0.0046	0.01166	0.00037	4.4	73.5	4.4	74.8	2.3	40	130	74.8	2.3	1.76871	Rim
18MR-07	18MR-07_34	478	310	0.0306	0.0015	0.004351	8.1e-05	1.5	30.5	1.5	27.98	0.52	216	98	27.98	0.52	8.2623
18MR-07	18MR-07_35	180.3	174.7	23.92	0.34	0.6723	0.0076	14	3263	14	3313	29	3230	11	3230	11	2.56966
18MR-07	18MR-07_36	788	18.5	1.847	0.025	0.1745	0.0018	8.9	1061	8.9	1036.4	9.6	1116	21	1116	21	7.13262
18MR-07	18MR-07_37	142.8	81.3	5.411	0.048	0.3514	0.0022	7.6	1885.9	7.6	1941	11	1830	17	1830	17	6.06557
18MR-07	18MR-07_38	177	128	4.196	0.056	0.3124	0.0025	11	1672	11	1752	12	1580	21	1580	21	10.8861
18MR-07	18MR-07_39	800	416	0.1025	0.0018	0.01542	0.00014	1.7	99.1	1.7	98.62	0.91	119	35	98.62	0.91	0.484359
18MR-07	18MR-07_40	177	109.6	0.1962	0.0066	0.0283	0.00032	5.6	181.4	5.6	179.9	2	225	73	179.9	2	0.826902
18MR-07	18MR-07_41	145	152.5	0.0831	0.0043	0.01287	0.00027	4.1	81.2	4.1	82.4	1.7	77	95	82.4	1.7	1.47783
18MR-07	18MR-07_42	188.9	242.3	1.976	0.021	0.1913	0.0012	7.1	1106.4	7.1	1128.2	6.4	1075	19	1075	19	4.94884
18MR-07	18MR-07_43	553	86	4.535	0.037	0.3097	0.0025	6.8	1736.9	6.8	1739	12	1749	12	1749	12	0.571755
18MR-07	18MR-07_45	472	195	4.052	0.073	0.2915	0.0044	15	1642	15	1648	22	1651	13	1651	13	0.181708
18MR-07	18MR-07_46	38.5	34.01	15.66	0.19	0.6002	0.0074	12	2855	12	3029	30	2742	18	2742	18	10.4668
18MR-07	18MR-07_47	70.6	22.84	0.071	0.018	0.00955	0.00025	5.5	60.9	5.5	61.3	1.6	50	140	61.3	1.6	0.656814
18MR-07	18MR-07_48	27.8	26	5.86	0.18	0.3524	0.0052	18	1941	18	1945	25	1949	37	1949	37	0.205233
18MR-07	18MR-07_49	223.4	104.1	0.0622	0.0027	0.00913	0.00013	2.6	61.2	2.6	58.56	0.83	175	87	58.56	0.83	4.31373
18MR-07	18MR-07_50	150.5	60.4	5.13	0.039	0.3442	0.0024	6.4	1840.6	6.4	1907	11	1781	14	1781	14	7.07468
18MR-07	18MR-07_51	181	165	0.0821	0.0034	0.01268	0.00018	3.2	79.9	3.2	81.2	1.2	73	79	81.2	1.2	1.62703
18MR-07	18MR-07_52	22.66	31.77	5.15	0.1	0.3408	0.0045	16	1839	16	1889	22	1796	32	1796	32	5.17817
18MR-07	18MR-07_53	464	303	3.485	0.066	0.2472	0.0049	15	1522	15	1423	26	1683	16	1683	16	15.4486
18MR-07	18MR-07_54	54.6	44.7	16.01	0.18	0.607	0.0065	11	2876	11	3057	26	2764	15	2764	15	10.6006
18MR-07	18MR-07_55	111.2	96.1	5.536	0.044	0.3606	0.0025	6.8	1905.7	6.8	1985	12	1829	17	1829	17	8.52925
18MR-07	18MR-07_56	75.7	106.3	5.895	0.067	0.3709	0.003	10	1960	10	2033	14	1893	18	1893	18	7.39567
18MR-07	18MR-07_57	168.1	70.5	5.25	0.045	0.3522	0.0024	7.7	1862	7.7	1945	12	1776	15	1776	15	9.51577
18MR-07	18MR-07_58	147.6	193.5	0.796	0.014	0.09593	0.00068	7.6	593.8	7.6	590.5	4	607	40	590.5	4	0.555743
18MR-07	18MR-07_59	117.4	142.1	5.712	0.066	0.3618	0.0031	10	1932	10	1990	15	1872	18	1872	18	6.30342
18MR-07	18MR-07_60	203	230	0.0885	0.006	0.01276	0.0002	4.1	83.9	4.1	81.7	1.3	145	89	81.7	1.3	2.62217
18MR-07	18MR-07_61	361	111.9	6.512	0.084	0.3662	0.0053	11	2046	11	2010	25	2088	20	2088	20	3.73563
18MR-07	18MR-07_63	109.4	98.2	0.0783	0.0047	0.01195	0.00027	4.4	76.2	4.4	76.5	1.7	90	110	76.5	1.7	0.393701
18MR-07	18MR-07_64	45.34	54.4	12.74	0.29	0.5251	0.0053	16	2650	16	2720	22	2599	22	2599	22	4.65564
18MR-07	18MR-07_65	90.4	107	11.36	0.23	0.4946	0.0047	17	2550	17	2590	20	2517	29	2517	29	2.90028
18MR-07	18MR-07_66	450.8	63.8	12.56	0.14	0.5257	0.0043	11	2646	11	2723	18	2589	13	2589	13	5.17574
18MR-07	18MR-07_68	406	323	0.0855	0.003	0.01294	0.00016	2.8	83.2	2.8	82.9	1	100	69	82.9	1	0.360577
18MR-07	18MR-07_69	604	303.1	0.094	0.0023	0.01428	0.00014	2.2	91.1	2.2	91.4	0.88	87	48	91.4	0.88	0.329308
18MR-07	18MR-07_70	88.9	64.5	14.25	0.14	0.5402	0.0057	9.3	2765.6	9.3	2783	24	2753	17	2753	17	1.08972
18MR-07	18MR-07_71	244	191	0.0914	0.0035	0.01322	0.00016	3.2	88.6	3.2	84.6	1	179	81	84.6	1	4.51467
18MR-07	18MR-07_72	46.9	47	2.002	0.04	0.196	0.0022	14	1117	14	1153	12	1033	43	1033	43	11.6167
18MR-07	18MR-07_73	342	214.4	11.163	0.065	0.5086	0.003	5.4	2536.5	5.4	2650	13	2443.9	9	2443.9	9	8.43324
18MR-07	18MR-07_74	499	240	0.0572	0.003	0.008172	9.5e-05	2.8	56.3	2.8	52.46	0.6	148	73	52.46	0.6	6.8206
18MR-07	18MR-07_75	63.4	65.2	6.06	0.064	0.373	0.0034	9.2	1983.1	9.2	2043	16	1913	18	1913	18	6.79561
18MR-07	18MR-07_76	370	257	0.1055	0.0037	0.0161	0.00027	3.4	101.6	3.4	102.9	1.7	69	63	102.9	1.7	1.27953
18MR-07	18MR-07_77	539	345.3	0.1096	0.0028	0.01575	0.00016	2.5	105.5	2.5	100.7	1	200	52	100.7	1	4.54976
18MR-07	18MR-07_78	285.4	134.9	0.1174	0.0033	0.01773	0.00021	3	112.5	3	113.3	1.4	100	58	113.3	1.4	0.711111
18MR-07	18MR-07_79	48.4	58.5	6.79	0.14	0.3829	0.005	18	2081	18	2089	23	2067	25	2067	25	1.06434
18MR-07	18MR-07_80	22.1	36.1	11.63	0.19	0.5114	0.0058	15	2571	15	2661	25	2492	21	2492	21	6.7817
18MR-07	18MR-07_81	16.54	2.82	17	0.33	0.605	0.01	19	2931	19	3047	41	2841	23	2841	23	7.25097
18MR-07	18MR-07_82	446	230.1	9.89	0.25	0.3917	0.0087	25	2418	25	2127	41	2650	15	2650	15	19.7358
18MR-07	18MR-07_83	89.9	64.9	2.319	0.035	0.213	0.002	10	1218	10	1245	11	1154	30	1154	30	7.88562
18MR-07	18MR-07_84	38.9	49.2	14.86	0.14	0.5652	0.0054	9.1	2805.5	9.1	2887	22	2743	15	2743	15	5.24973
18MR-07	18MR-07_85	107.2	90.2	26.59	0.16	0.6941	0.0043	5.9	3367.8	5.9	3397	16	3343.5	8.1	3343.5	8.1	1.60012
18MR-07	18MR-07_86	192	63.1	5.988	0.057	0.3769	0.0031	8.2	1973	8.2	2061	14	1871	15	1871	15	10.155
18MR-07	18MR-07_87	157.3	115.9	0.0967	0.0047	0.01485	0.00028	4.3	93.5	4.3	95	1.8	63	90	95	1.8	1.60428
18MR-07	18MR-07_88	57.5	51.1	4.427	0.065	0.3184	0.0035	12	1716	12	1781	17	1625	28	1625	28	9.6
18MR-07	18MR-07_89	315	377	0.0887	0.0041	0.01302	0.0002	3.8	86	3.8	83.4	1.3	135	82	83.4	1.3	3.02326
18MR-07	18MR-07_90	51.3	56.1	1.891	0.072	0.1765	0.0022	19	1065	19	1048	12	1091	59	1091	59	3.94134
18MR-07	18MR-07_92	168	59.4	5.012	0.053	0.3353	0.0034	8.8	1821.2	8.8	1863	17	1762	17	1762	17	5.73212
18MR-07	18MR-07_93	179	154	15.4	0.19	0.5786	0.0074	11	2839	11	2941	30	2758	17	2758	17	6.63524
18MR-07	18MR-07_94	78	190.5	6.004	0.078	0.3652	0.0035	11	1976	11	2006	17	1937	20	1937	20	3.56221
18MR-07	18MR-07_96	238	76.9	4.574	0.039	0.3153	0.0028	7.2	1743.5	7.2	1766	14	1709	14	1709	14	3.33528
18MR-07	18MR-07_97	9.77	7.67	14.28	0.3	0.5355	0.0093	20	2766	20	2760	39	2764	27	2764	27	0.144718
18MR-07	18MR-07_98	57.8	51.8	2.18	0.04	0.1978	0.0025	13	1172	13	1163	14	1182	39	1182	39	1.60745
18MR-07	18MR-07_99	327.3	111.4	4.652	0.038	0.3183	0.0024	6.9	1758	6.9	1781	12	1724	13	1724	13	3.30626
18MR-07	18MR-07_100	270	178	0.2278	0.0053	0.03204	0.00035	4.4	208	4.4	203.3	2.2	250	51	203.3	2.2	2.25962
18MR-07	18MR-07_101	314	155	0.4632	0.0078	0.05888	0.00066	5.4	386	5.4	368.7	4	468	40	368.7	4	4.48187
18MR-07	18MR-07_102	485	201.9	4.113	0.048	0.2805	0.0027	9.8	1656.8	9.8	1593	13	1724	12	1724	12	7.59861
18MR-07	18MR-07_103	291.1	249.3	0.5447	0.0073	0.07107	0.0004	4.8	441.1	4.8	442.6	2.4	409	31	442.6	2.4	0.340059
18MR-07	18MR-07_105	95.7	70.3	2.837	0.036	0.2421	0.0017	9.6	1364.1	9.6	1397.7	8.9	1298	24	1298	24	7.68105
18MR-07	18MR-07_106	70.6	80.3	1.837	0.027	0.1809	0.0014	9.5	1058.6	9.5	1071.6	7.5	1013	30	1013	30	5.7848
18MR-07	18MR-07_107	93.8	77.8	1.942	0.029	0.1851	0.0012	9.9	1093.9	9.9	1094.8	6.4	1070	30	1070	30	2.31776
18MR-07	18MR-07_108	144	148	0.089	0.0044	0.01296	0.00023	4.1	86.2	4.1	83	1.5	180	100	83	1.5	3.7123
18MR-07	18MR-07_109	48.8	27.2	1.895	0.038	0.1852	0.0021	13	1077	13	1095	12	1048	39	1048	39	4.48473
18MR-07	18MR-07_110	408	153.6	1.793	0.029	0.1747	0.0023	11	1042	11	1038	12	1037	21	1037	21	0.096432
18MR-07	18MR-07_111	425.5	210.3	0.0573	0.002	0.0078	0.0001	1.9	56.5	1.9	50.1	0.65	306	76	50.1	0.65	11.3274
18MR-07	18MR-07_112	334	89.7	2.232	0.033	0.2031	0.0027	10	1191	10	1192	14	1190	18	1190	18	0.168067
18MR-07	18MR-07_113	110.1	49.7	5.503	0.072	0.3517	0.0031	11	1899	11	1942	15	1855	18	1855	18	4.69003
18MR-07	18MR-07_114	209	82.4	0.576	0.013	0.06944	0.00062	7.8	462.4	7.8	432.7	3.7	599	53	432.7	3.7	6.42301
18MR-07	18MR-07_115	166	147	0.0719	0.0039	0.0107	0.00019	3.6	70.3	3.6	68.6	1.2	130	100	68.6	1.2	2.41821
18MR-07	18MR-07_116	400	343	4.252	0.08	0.2933	0.0051	16	1683	16	1657	26	1727	26	1727	26	4.05327
18MR-07	18MR-07_117	221.2	48.7	2.761	0.047	0.2144	0.0034	13	1343	13	1252	18	1504	19	1504	19	16.7553
18MR-07	18MR-07_118	272.8	235.6	4.185	0.049	0.3037	0.003	10	1668	10	1709	15	1632	16	1632	16	4.71814
18MR-07	18MR-07_119	375	377	0.1094	0.0031	0.01679	0.00019	2.8	105.2	2.8	107.3	1.2	87	57	107.3	1.2	1.9962
18MR-07	18MR-07_120	125.5	132.9	2.277	0.029	0.2104	0.0016	9.1	1204	9.1	1230.6	8.3	1176	22	1176	22	4.64286
18MR-07	18MR-07_121	79.1	107.7	2.909	0.046	0.2414	0.0028	12	1382	12	1394	14	1386	28	1386	28	0.577201
18MR-07	18MR-07_122	197	127	0.1831	0.0051	0.02667	0.00032	4.4	170.9	4.4	169.7	2	202	59	169.7	2	0.702165
18MR-07	18MR-07_123	286	162	0.1942	0.0048	0.02768	0.00032	4.1	179.9	4.1	176	2	245	51	176	2	2.16787
18MR-07	18MR-07_124	25.86	16.86	13.75	0.18	0.544	0.0057	12	2730	12	2799	24	2696	20	2696	20	3.82047
18MR-07	18MR-07_125	223.8	210.5	0.0932	0.0067	0.0126	0.00018	5.8	89.8	5.8	80.7	1.1	270	110	80.7	1.1	10.1336
18MR-07	18MR-07_126	322	93.4	3.47	0.065	0.2374	0.0052	15	1518	15	1372	27	1747	24	1747	24	21.4654
18MR-07	18MR-07_127	117.5	116.7	0.088	0.0059	0.01268	0.00029	5.4	85.3	5.4	81.2	1.9	200	120	81.2	1.9	4.80657
18MR-07	18MR-07_128	152	46.4	2.453	0.047	0.2024	0.0038	14	1257	14	1187	20	1386	31	1386	31	14.3579
18MR-07	18MR-07_129	305	169	0.2105	0.005	0.03117	0.00037	4.2	193.6	4.2	197.8	2.3	155	48	197.8	2.3	2.16942
18MR-07	18MR-07_130	501	270	2.187	0.018	0.2067	0.0016	5.8	1176.5	5.8	1211	8.4	1125	14	1125	14	7.64444
18MR-07	18MR-07_131	118	55.7	4.65	0.13	0.3219	0.0059	26	1764	26	1798	29	1711	53	1711	53	5.08475
18MR-07	18MR-07_132	262	170	0.1061	0.0053	0.01539	0.00032	4.8	102	4.8	98.5	2	177	90	98.5	2	3.43137
18MR-07	18MR-07_133	96.8	63.5	5.076	0.062	0.3434	0.0028	10	1831	10	1903	13	1756	19	1756	19	8.3713
18MR-07	18MR-07_134	43.6	28.5	6.003	0.081	0.3996	0.0043	12	1978	12	2166	20	1775	24	1775	24	22.0282
18MR-07	18MR-07_135	96	44.8	3.399	0.049	0.2722	0.0028	11	1503	11	1552	14	1426	32	1426	32	8.8359
18MR-07	18MR-07_136	310.4	206.7	1.001	0.018	0.099	0.0011	9.1	703	9.1	608.4	6.5	1019	39	608.4	6.5	13.4566
18MR-07	18MR-07_137	347.2	180.3	3.359	0.068	0.2386	0.0046	16	1493	16	1378	24	1644	23	1644	23	16.18
18MR-07	18MR-07_138	520	87.9	4.813	0.055	0.3218	0.0036	9.2	1787.5	9.2	1798	17	1763	15	1763	15	1.98525
18MR-07	18MR-07_139	174.2	129.1	3.871	0.086	0.2786	0.0039	18	1605	18	1584	20	1621	26	1621	26	2.28254
18MR-07	18MR-07_140	581	262	3.497	0.087	0.2347	0.0065	19	1523	19	1357	34	1758	37	1758	37	22.81
18MR-07	18MR-07_141	206.1	118.1	1.408	0.029	0.1322	0.0013	12	890	12	800.4	7.4	1119	36	800.4	7.4	10.0674
18MR-07	18MR-07_142	230.5	87.3	2.04	0.02	0.1899	0.0012	6.7	1128.4	6.7	1120.6	6.3	1130	19	1130	19	0.831858
18MR-07	18MR-07_144	112	113.1	14.36	0.11	0.5507	0.0034	7.2	2773	7.2	2828	14	2727	11	2727	11	3.7037
18MR-07	18MR-07_145	502	195.2	10.05	0.12	0.4578	0.0042	10	2438	10	2429	18	2442.4	8.4	2442.4	8.4	0.548641
18MR-07	18MR-07_146	411.6	96.5	6.53	0.16	0.3473	0.0063	22	2047	22	1921	30	2173	16	2173	16	11.5969	Core
18MR-07	18MR-07_146	660	241	0.0791	0.0033	0.01182	0.0002	3.1	77.3	3.1	75.7	1.3	119	82	75.7	1.3	2.06986	Rim
18MR-07	18MR-07_147	339.3	465	4.579	0.086	0.2952	0.0067	15	1744	15	1666	33	1833	30	1833	30	9.11075
18MR-07	18MR-07_149	488	261	0.1107	0.0033	0.01538	0.00015	3.1	106.8	3.1	98.41	0.95	289	62	98.41	0.95	7.85581
18MR-07	18MR-07_150	180	147.8	3.532	0.056	0.2832	0.0033	13	1533	13	1607	17	1433	24	1433	24	12.1424
18MR-08	18MR-08_1	90.2	99.4	0.3248	0.0094	0.04478	0.00061	7.3	285.5	7.3	282.4	3.8	281	61	282.4	3.8	1.08581
18MR-08	18MR-08_2	69	51.9	0.1018	0.0064	0.01465	0.00032	5.8	97.9	5.8	93.7	2	160	120	93.7	2	4.29009
18MR-08	18MR-08_3	647	74	0.0852	0.0056	0.01383	0.00049	5.2	83	5.2	88.6	3.1	-40	130	88.6	3.1	6.74699	Rim
[truncated: 3,513 more rows]
